# Supplementary material
Source: PubMed Central journal article supplement (PMC3529015)
Supplement: 1218668109_sapp.pdf [file 1218668109_sapp.pdf]

## **Section 1: Sorghum chromosome 2 originated by insertion of rice-like ancestral chromosome 9 into 7**

Wei et al (reference [11] in the main text) reconstructed sorghum chromosome 2 by end-to-end fusion of ancestral chromosomes 9 and 7 (see Fig. 3A of reference [11]). However, according to Fig. S1, counting from bottom to top, the 10 panels of the second row show the relationship between sorghum chromosome 2 and ten rice chromosomes. Large synteny blocks can be seen in 4 panels, i.e., s2-r3, s2-r7, s2-r8 and s2-r9. Ks analysis suggests that the s2-r3 and s2-r8 synteny blocks are secondary or come from paralogous gene pairs (see Materials and Methods). The patterns in s2-r7 and s2-r9 indicate that sorghum chromosome 2 originated through insertion of rice-like chromosome 9 into 7.

## **Section 2: Comparative maps of sorghum-maize, sorghum-rice and rice-maize**

The rice-maize comparative map is not shown here, but one can easily generate it using CoGe (<http://synteny.cnr.berkeley.edu/CoGe/>) or SyMAP (<http://www.symapdb.org/>).

Using to the three comparative maps, we checked all of the events discussed in this project and confirmed that they happened in the maize lineage. We did find some events that happened in sorghum or in rice or in the common sorghum-maize ancestor, but none of these are related to centromere long-distance movement or chromosome number change. Fig. S2 gives an example of an inversion that happened in rice or the sorghum-maize ancestor, as indicated by the fact that the inversion (marked by red ellipse) is found in rice-sorghum and rice-maize comparisons but not in the sorghum-maize comparison.

Besides events related to chromosome number reduction and movement of centromeres/pericentromeres, some other quite pronounced events that changed maize chromosome structures can be observed from the sorghum-maize comparative map:

(1) The terminal region (0Mb - 2.8Mb) of ancestral chromosome 7A (region a in Fig. S3) corresponds to the terminal region of maize chromosome 6 (0 - 9.7Mb), while its downstream region corresponds to the short arm of maize chromosome 10. 2.4Mb – 4.3Mb of ancestral chromosome 9A (b in Fig. S3) corresponds to the 83.5Mb - 90.7Mb of maize chromosome 10, while all the other regions in 9A correspond to maize chromosome 6. The two movements occurred between maize chromosome 6 and 10. One moved from chromosome 6 to 10, and the other from 10 to 6. Drastic genome rearrangements in the maize genome have removed much of the history of these events. How and when these two segments moved is not clear.

(2) On maize chromosome 4, many sequences belonging to the two arms of ancestral chromosome 5A are found in the centromere/pericentromere of ancestral chromosome 4B. This indicates extensive intra-chromosomal rearrangements of these sequences.

(3) The gene synteny pattern of maize chromosome 3 indicates an inversion that affected both ancestral chromosomes 3A and 8B. This inversion occurred after the whole-chromosome insertion event (main text). A similar insertion-inversion pattern is also found in the regions that correspond to ancestral chromosome 2B and 5B in maize chromosome 2, but the pattern of synteny blocks here is too complex to allow a simple reconstruction.

(4) Besides the events described above, numerous inversions at all scales are observed in all chromosomes.

### **Section 3: A whole-chromosome insertion that was adjacent to a centromeric/pericentromeric region**

The majority of genomic regions of maize chromosome 8 matched both sorghum chromosome 3 and 9 because the two sorghum chromosomes originated through WGD in the grass common ancestor, and they were orthologous to rice chromosome 1 and 5, respectively (Fig. S1 and see also [17] in the main text). Ks analysis detected the orthologous regions (See Materials and Methods) and showed that maize chromosome 8 originated by the insertion of ancestral chromosome 9B into 3B. The insertion site was adjacent to, but not within, the centromere/pericentromere region of current cen3 (Fig. S11).

## **Supplemental figures**

**Figure S1: Sorghum-rice comparative map**

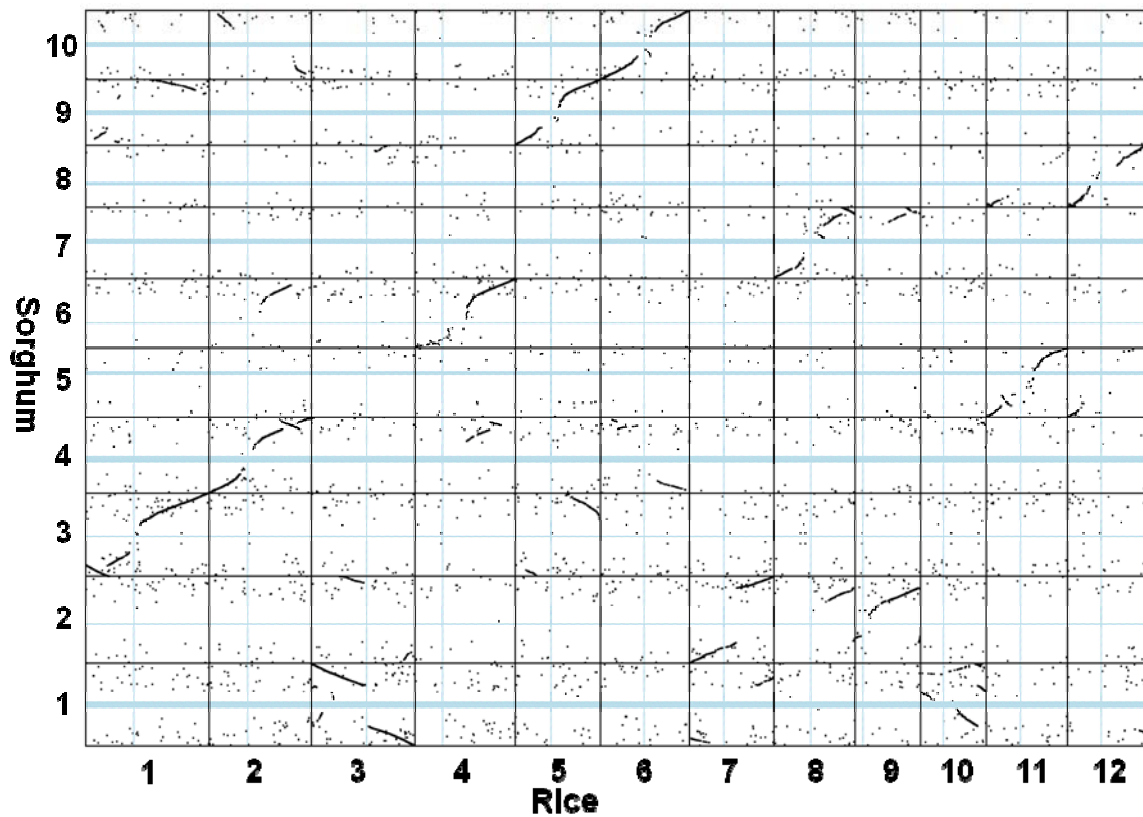

All of the orthologous centromeres shared by rice and sorghum are located inside centromeric/pericentromeric syntenic gaps (intersection of light blue bars inside syntenic gaps). This indicates that the positions of centromeres in rice and sorghum are stable, although it's possible that centromeres moved somewhat within the centromeric/pericentromeric regions. Row 2 shows that sorghum chromosome 2 originated by insertion of ancient chromosome 9 into 7 (see Section 1 for details).

**Figure S2: Differences between sorghum-maize and sorghum-rice comparative maps**

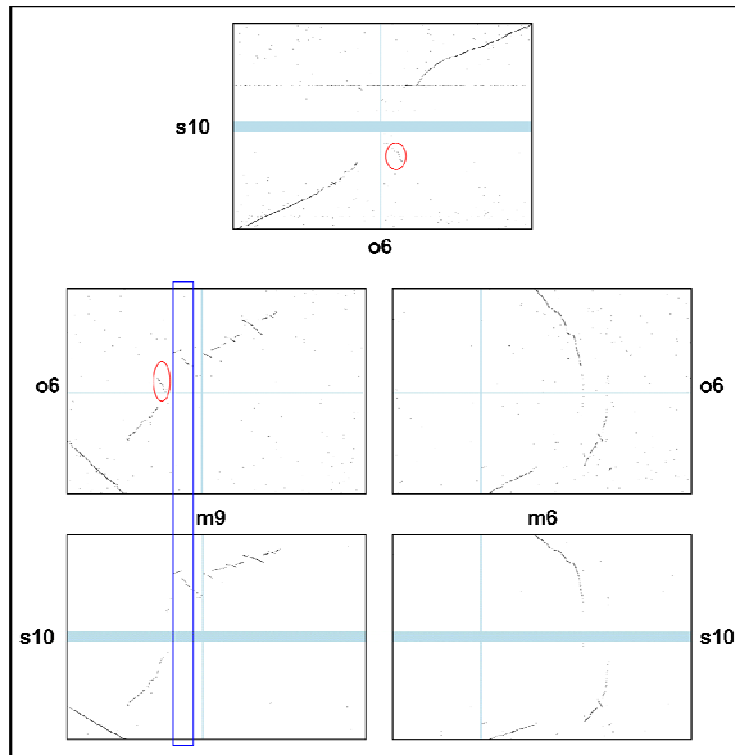

An example of an inversion that happened in rice or the sorghum-maize ancestor. The inversion (marked by red ellipse) is found in rice-sorghum and rice-maize comparisons but not in the sorghum-maize comparison.

**Figure S3: Sorghum-maize comparative map**

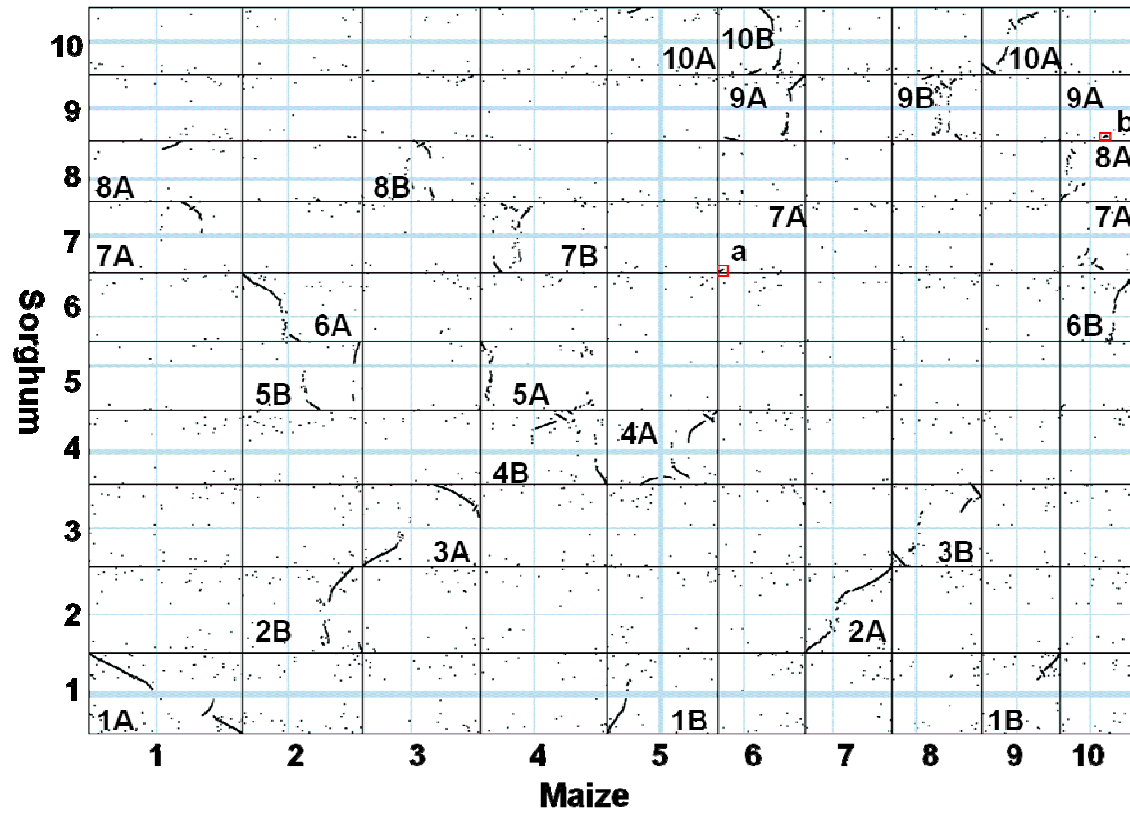

Two sets of sorghum-like ancient chromosomes are labeled as 1A, 1B, 2A, 2B, etc. In the text, each panel is labeled by “maize chromosome”-“ancestral chromosome”. For example, the comparative map of sorghum chromosome 1 v.s. maize chromosome 1 is labeled as “m1-1A”. Two regions moved between chromosome 6 to 10, i.e. a and b, are highlighted with red boxes. See Section 2 (1) for details of the two regions.

**Figure S4: Reconstruction of rearrangements that led to the evolution of maize chromosome 5 and 9**

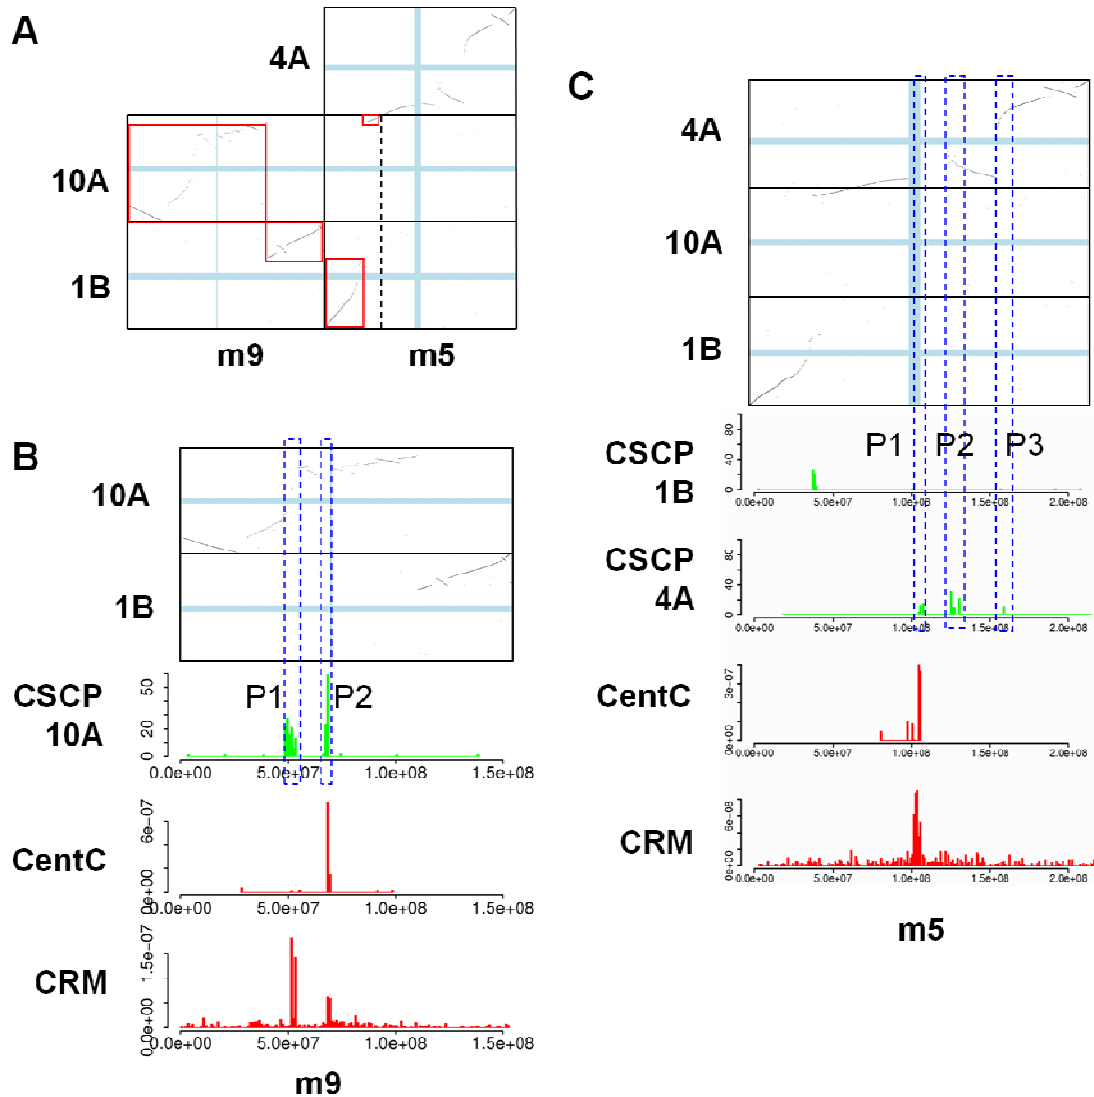

(A) M9 and M5 originated by translocation and fusion. The black dashed box marks the regions involved in the translocation. Red boxes mark syntenic blocks. Vertical and horizontal light blue bars mark the locations of centromeres. (B) and (C) The comparative map panels, the distribution of CSCPs (green) and of centromeric satellite repeats (red) are aligned according to the shared maize chromosome (X-axes).

**Figure S5: Reconstruction of chromosome reduction through comparative maps**

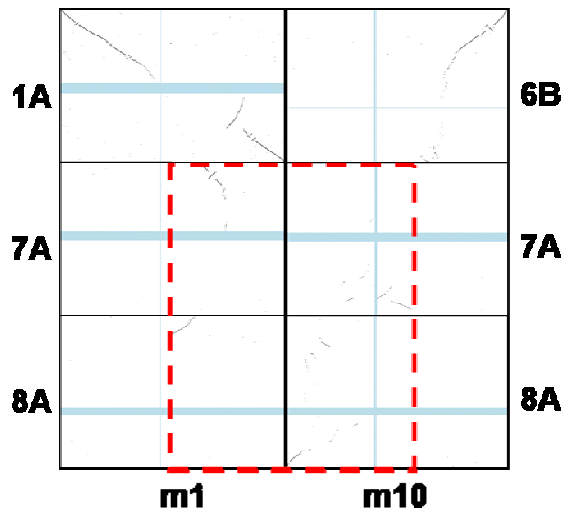

(A) Although with imprecise end points, the translocation between 7A and 8A can be traced (red dashed line box). The two recombinants of this translocation are components of m1 and m10. The progenitor of m1 originated through insertion of one recombinant into 1A. The progenitor of m10 originated through fusion of the other recombinant and 6B.



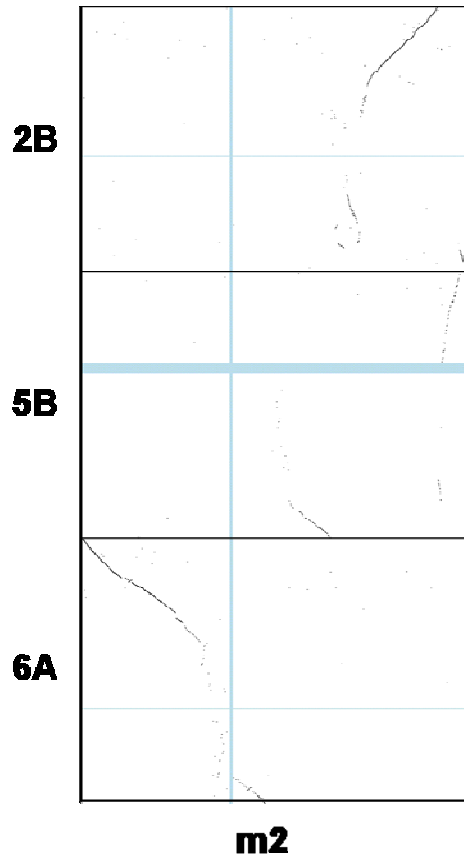

(B) Insertion of 2B into 5B, followed by rearrangements. The fusion of 6A and 5B may have happened either before or after the insertion.

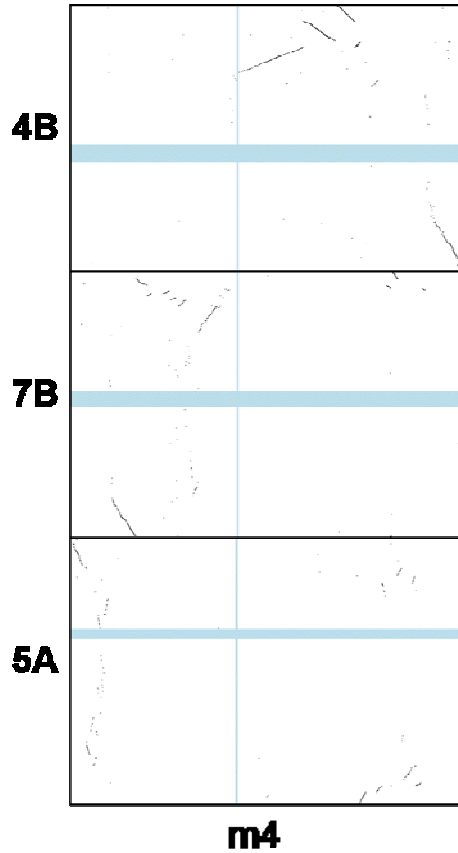

(C) M4 originated by two fusions: 5A with 7B and 7B with 4B. Extensive intra-chosomal movements can be seen.

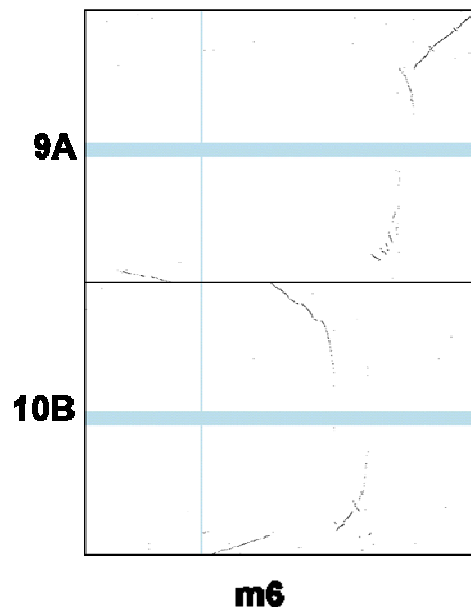

(D) Not considering the 5' end (region a in Fig. S3), m6 originated by insertion of 10B into 9A.

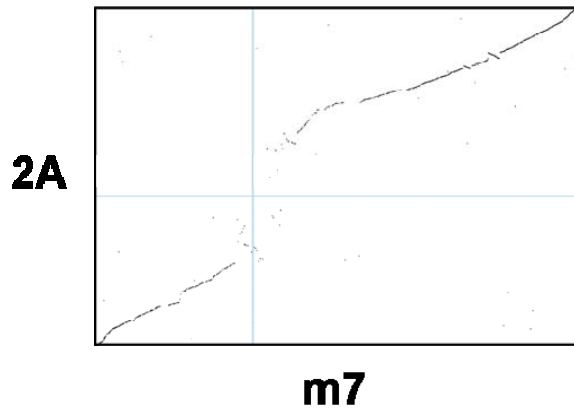

(E) M7 and 2A are orthologous chromosomes.

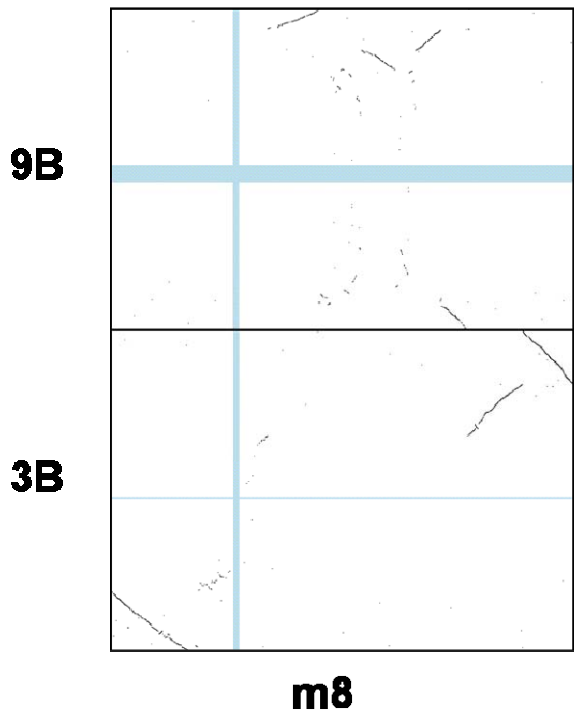

(F) M8 originated by insertion of ancestral 9B into 3B.

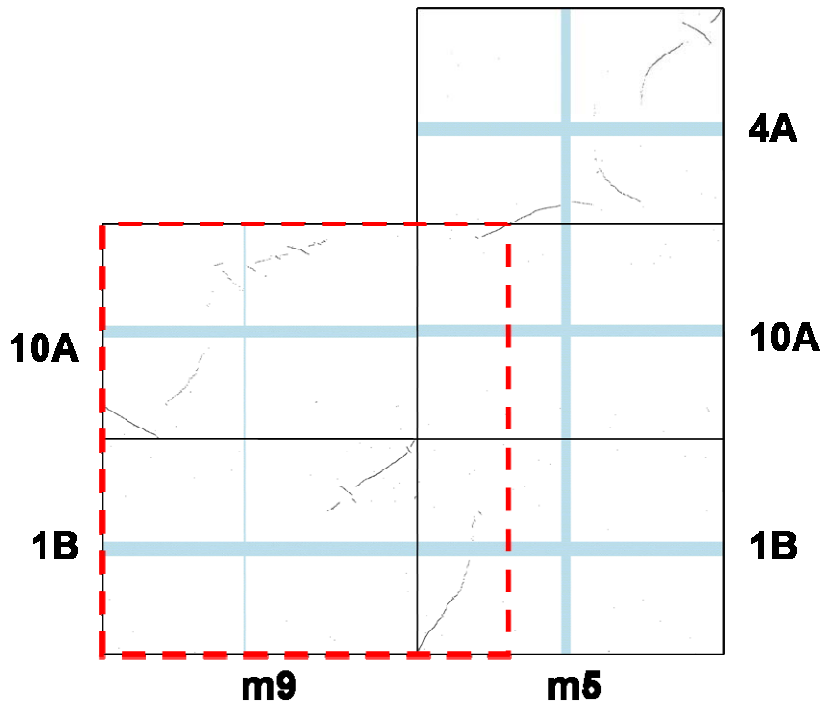

(G) See Fig. S4 and main text for details

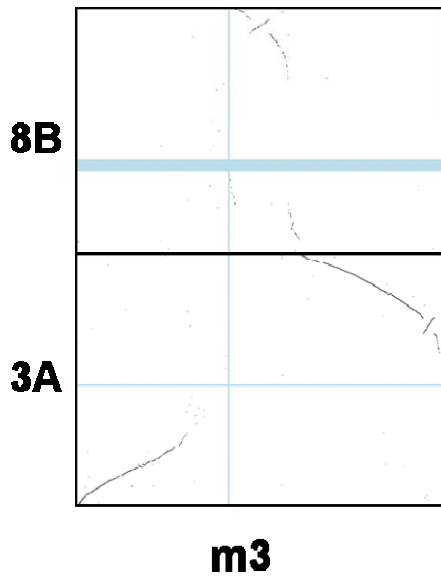

(H) See Fig. 1 and main text for details

## Figure S6: CSCP length distribution

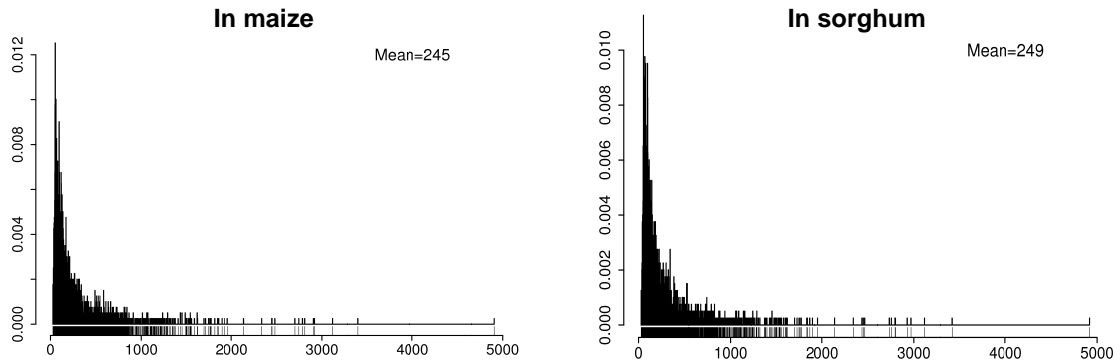

CSCP length distribution in sorghum and maize. Left: distribution in maize. Right: distribution in maize.

**Figure S7: Distribution of maize CSCPs related to sorghum centromeres/pericentromeres**

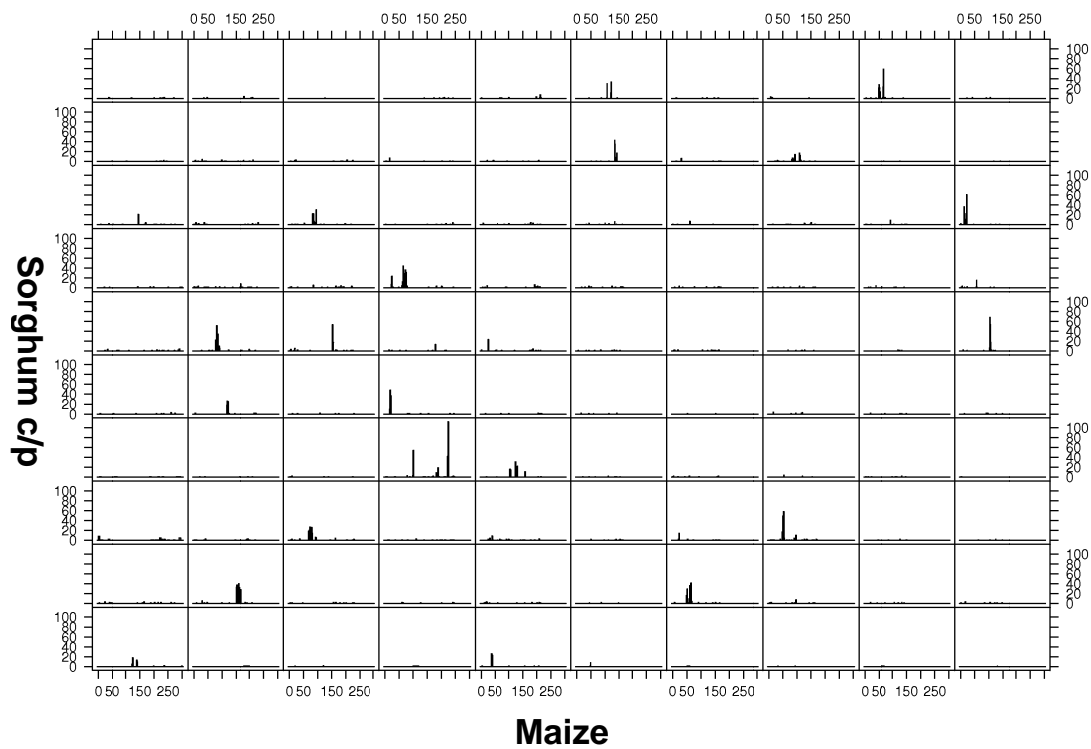

From left to right, column 1-10 represent maize chromosomes 1-10, respectively. The unit of coordinates is Mb. From bottom to top, rows 1-10 represent the distribution of maize CSCPs matching sorghum centromere/pericentromere 1-10, respectively. Y-axis of each panel shows the frequency of maize CSCPs. The panel ( $m, n$ ) represents CSCPs distribution in maize chromosome  $m$ , and these maize CSCPs are single hits of CSCPs in the sorghum chromosome  $n$  centromeric/pericentromeric region.

**Figure S8: Relationships of current and ancient centromeres/pericentromeres between sorghum and maize**

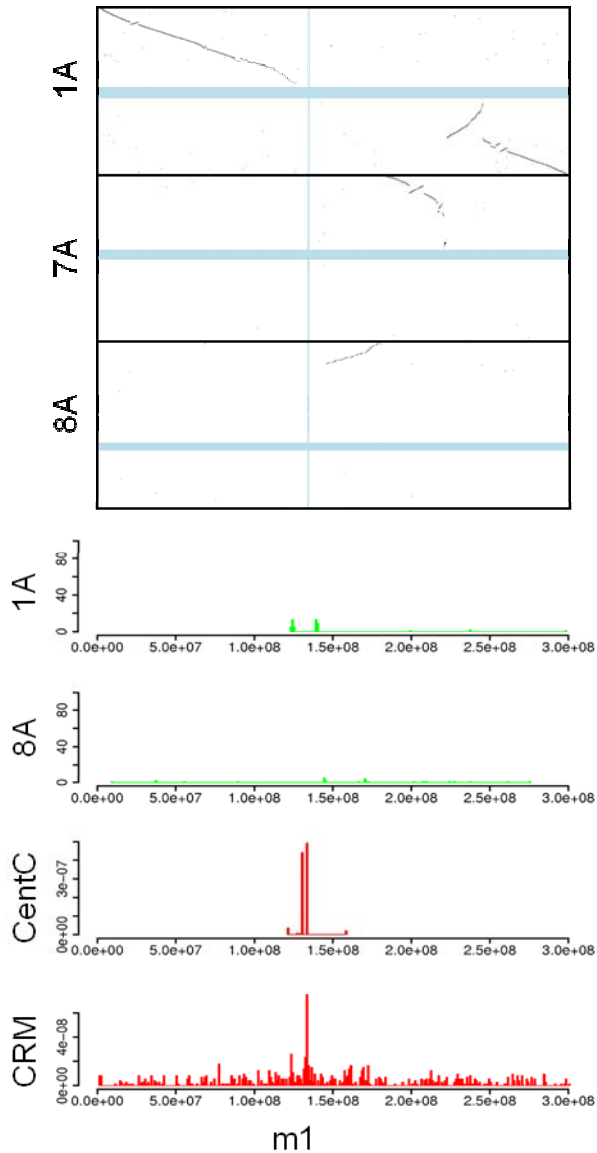

(A) Only one of the ten sorghum centromeres/pericentromeres, i.e. centromere/pericentromere 1A, has more than 10 related CSCP in maize chromosome 1 (m1). The position of CSCP peaks related to centromere/pericentromere 1A overlaps with current maize cen1. This indicates that maize cen1 originated from cen1A. The peak related to centromere/pericentromere 8A is lower than 10. Centromere/pericentromere 7A does not have related CSCPs in maize. We suggest that the chromosome segments of 7A and 8A that are components of m1 do not contain ancient centromeres. The location of CentC and CRMs peaks (red) is consistent with the estimated position of maize cen1.

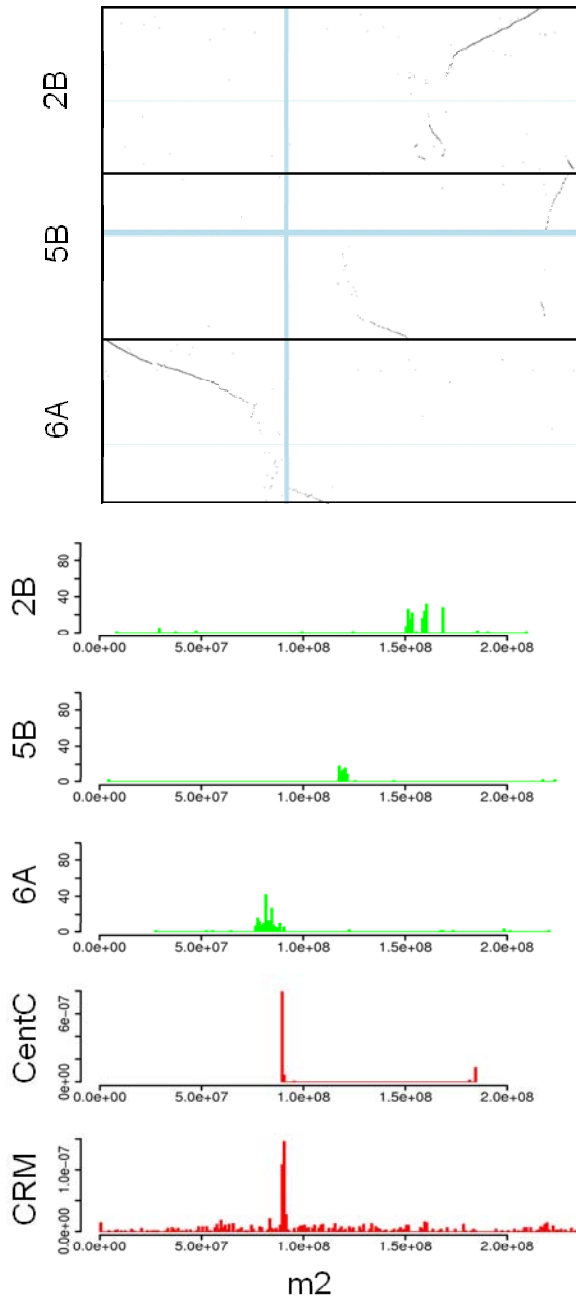

(B) Three sorghum centromeres/pericentromeres have counterparts in m2. Current maize cen2 is covered by CSCPs related to ancient centromere/pericentromere 6A and this indicates that it originated from cen6A. CSCP peaks related to centromere/pericentromere 5B and 2B give the location of ancient centromere/pericentromere remnants. The 2 ancient centromeres cannot be traced by CentC or CRM.



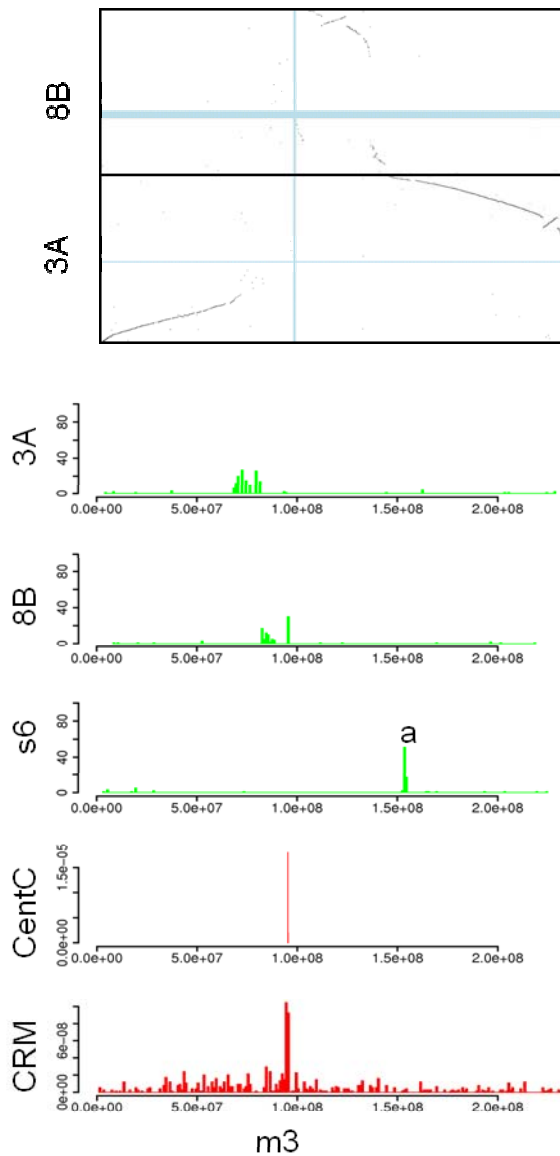

(C) Peak a related to centromere/pericentromere s6 corresponds to a region exhibiting a small synteny gap. This region may represent inter-chromosomal rearrangement of centromere/pericentromere s6 or assembly error. CSCP peaks related to centromere/pericentromere 8B cover maize cen3, which indicates that current maize cen3 originated from cen8B. Gene synteny patterns indicate movement of this centromere. The locations of CSCP peaks related to centromere/pericentromere 3A do not overlap with maize cen3A, indicating loss of this centromere (see main text for details).

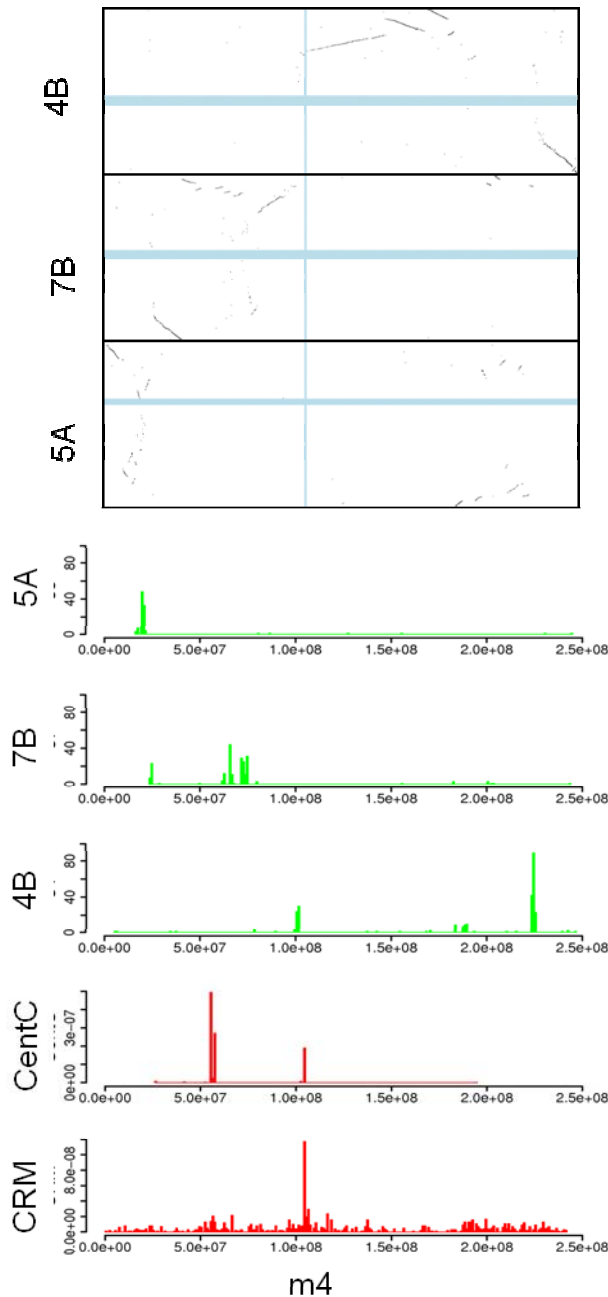

(D) CentC peak at 54Mb - 58Mb may be an artificial peak caused by a genome assembly error (Fig. S10). The gene synteny pattern and the distribution of CSCPs related to centromere/pericentromere 4B support the model that maize cen4 originated from cen4B and movement of this centromere by inversion (Fig. S9B). The CSCPs at ~225Mb of m4 are from part of ancient centromere/pericentromere 4A. This indicates that the break points of the inversion were located inside centromere/pericentromere 4A. Positions of CSCP peaks related to centromere/pericentromere 5A and 7B do not overlap with current centromere/pericentromere, indicating loss of these two centromeres.

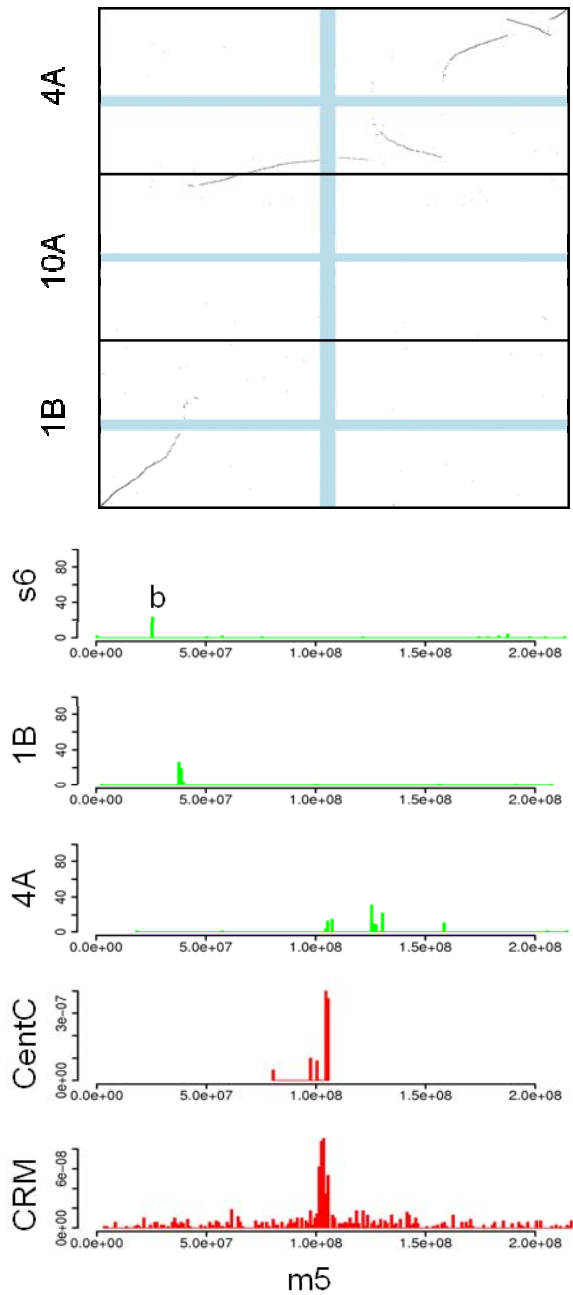

(E) Similar to peak a in (C), peak b may represent inter-chromosomal rearrangement of centromere/pericentromere s6 or assembly error. The synteny pattern and CSCP peaks related to centromere/pericentromere 4A indicates current maize cen5 originated from cen4A and the movement of this centromere (see main text and Fig. S4 for details). Centromere/pericentromere 10A does not have >10 counterpart sequences in m5. The position of the CSCP peak related to centromere/pericentromere 1B indicates functional loss of this centromere.

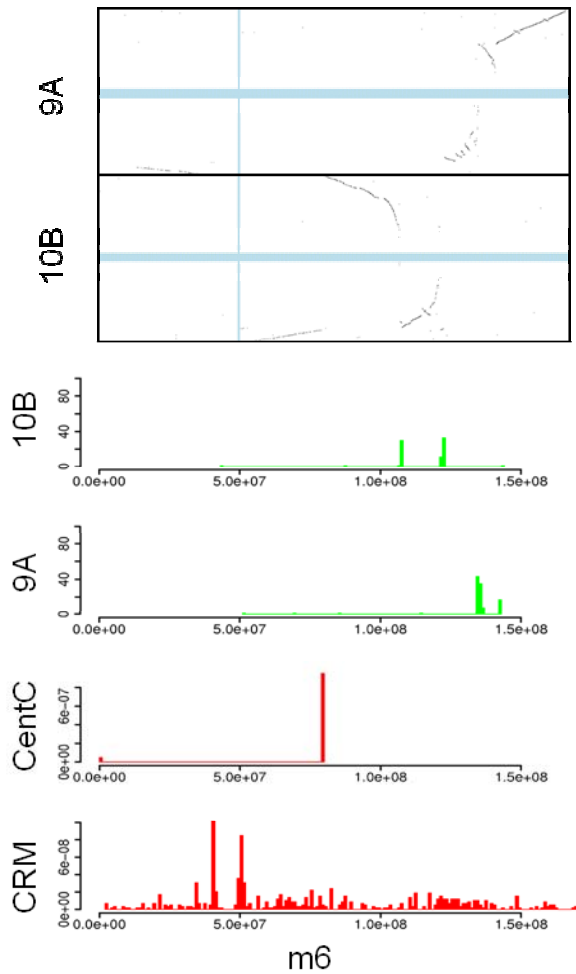

(F) Although it is clear that m6 originated by insertion of 10B into a chromosome arm of 9A, very few CentC repeats and CSCPs are detected at current cen6 (49 Mb - 54 Mb). Therefore CSCP data cannot provide direct evidence showing the origin of maize cen6. Given that maize cen6 is not a novel centromere, according to the comparative maps, the simplest model of maize cen6 evolution is that it originated from cen10B and experienced movement (Fig S9d). The CentC peak at 78 Mb - 90 Mb does not have CSCP and CRM support. It may be an assembly error.

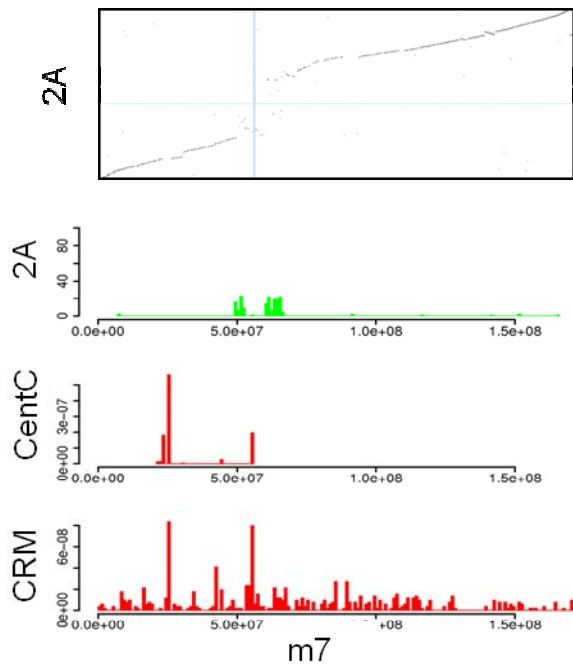

(G) CSCPs related to centromere/pericentromere 2A overlap with current maize cen7. This is direct evidence that maize cen7 originated from cen2A. The region 22Mb - 26Mb in m7 show CentC arrays and abundant CRMs. A gene synteny gap and low gene density are also found here. CSCPs do not support the conclusion that this region is related to any ancient centromere/pericentromere. The apparent centromeric repeat peaks in this region may be caused by an assembly error.

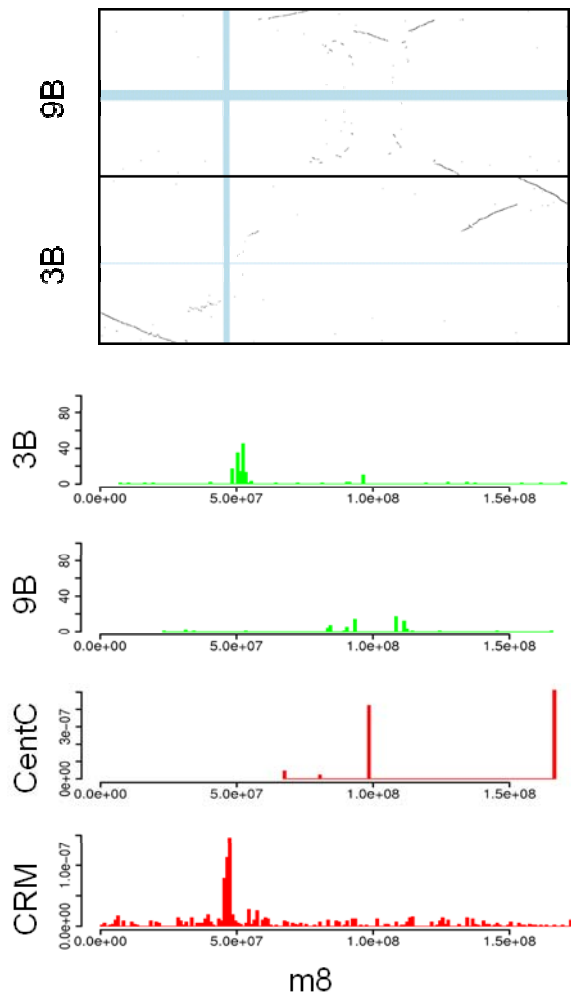

(H) The wide expansion of the distribution of CSCPs related to 9B may have been caused by the extensive rearrangements in this chromosome, as can be seen from the comparative map. Two CentC peaks that do not correspond to any centromere/pericentromere may be artificial peaks caused by assembly error (Fig. S10).

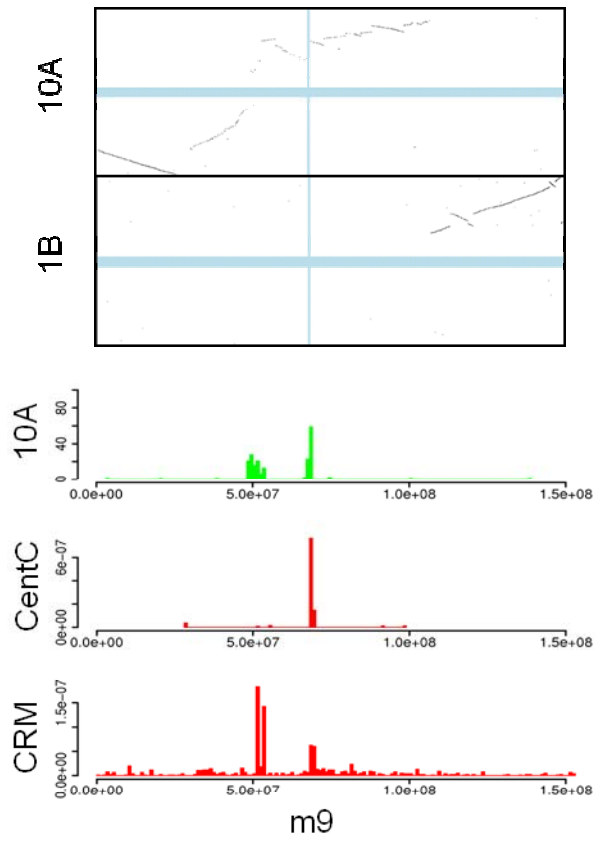

(I) Both CSCP peaks related to centromere/pericentromere 10A and CRM support the movement of maize cen9 (see Fig.S4 and Fig. S9E for details).

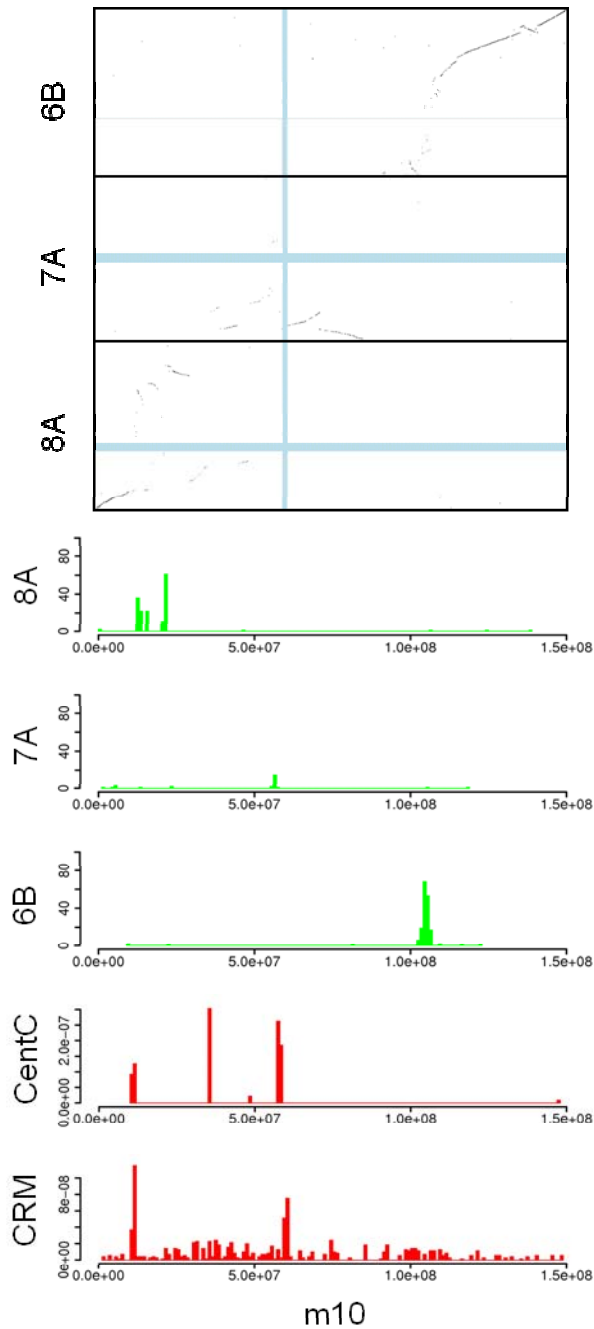

(J) A CentC peak is found at 34Mb - 36Mb. It may be artificial peak caused by assembly error (Fig. S10). The peak located at 11Mb - 13Mb corresponds to ancient centromere/pericentromere 8A. This peak is relocated in assembly release 5b.60 (Fig. S10). Current maize cen10 overlaps with centromere/pericentromere 7A, so it is likely to have originated from cen7A.



**Figure S9: Models for centromere/pericentromere movement on *Zea* chromosomes during the descent of maize from a tetraploid ancestor.**

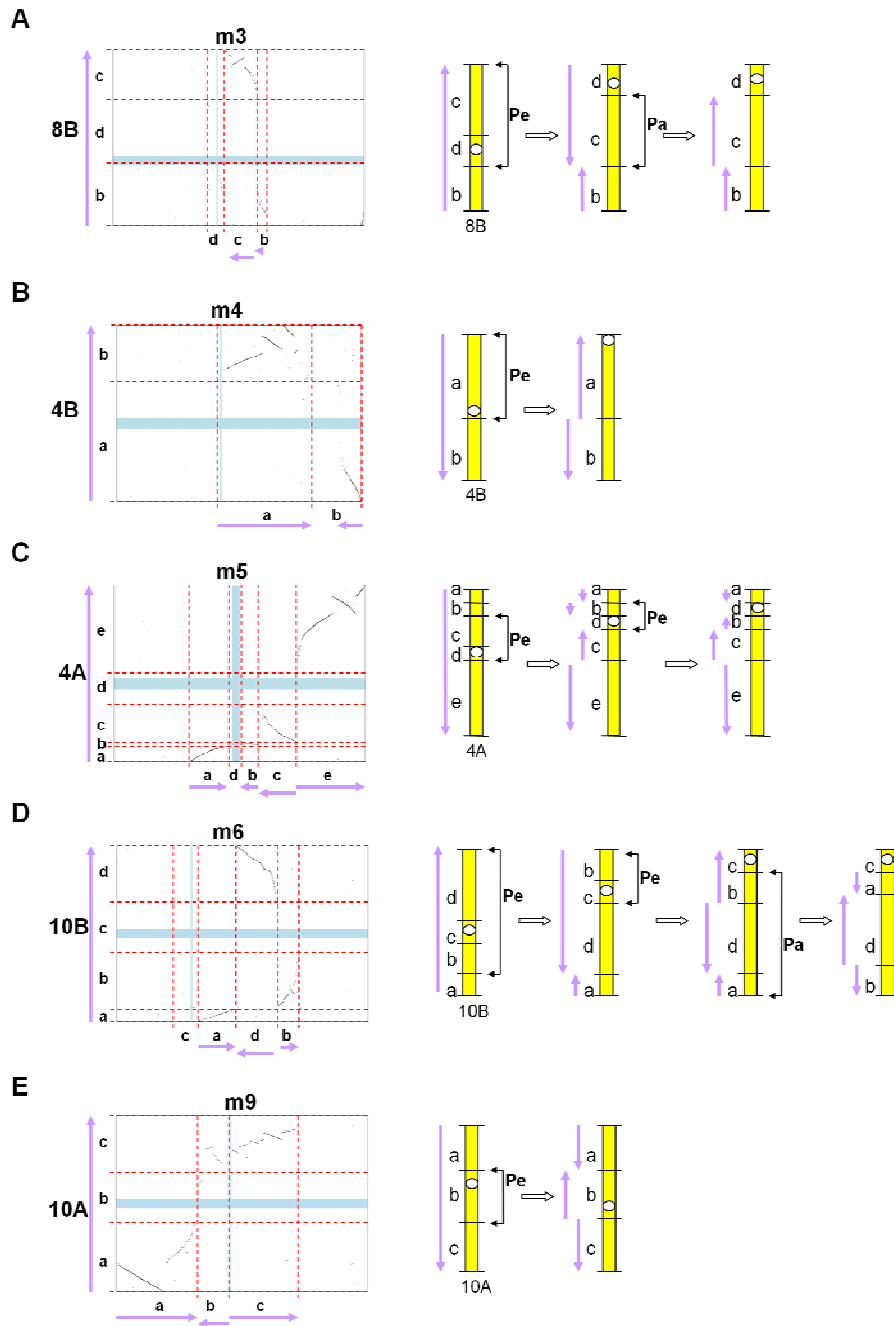

Pe and Pa are abbreviations for pericentric and paracentric inversion, respectively. Orchid arrows show the orientations of genomic regions. The arrows are not marked at some centromeres/pericentromeres because their orientations cannot be determined by the comparative map. Lower case letters and segments in chromosomes give the order of genomic regions that have been rearranged.

**Figure S10: CentC/CRM distribution in two maize assemblies**

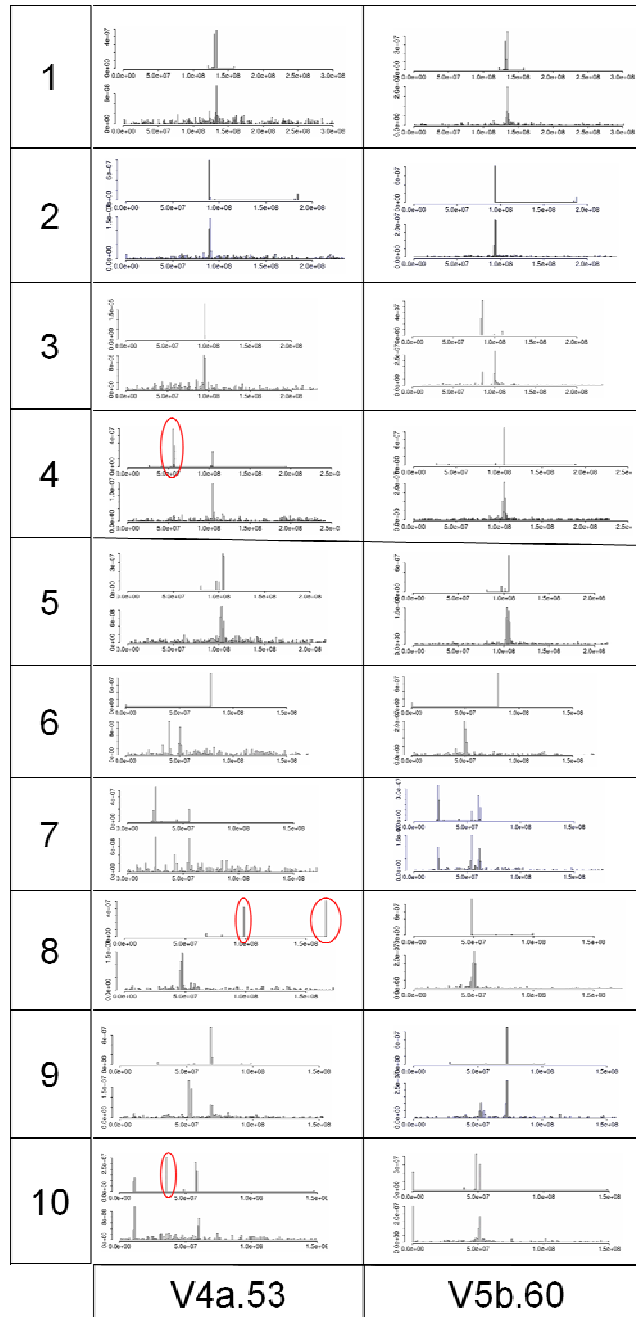

In assembly version 4a.53, Five CentC/CRM peaks were found at positions corresponding to neither ancient nor current centromeres (left column). Four of them (red ellipses) are not found in the maize genome release 5b.60 (right column). They might be artificial peaks caused by assembly error.

**Figure S11: A whole-chromosome insertion that was adjacent to a centromeric/pericentromeric region**

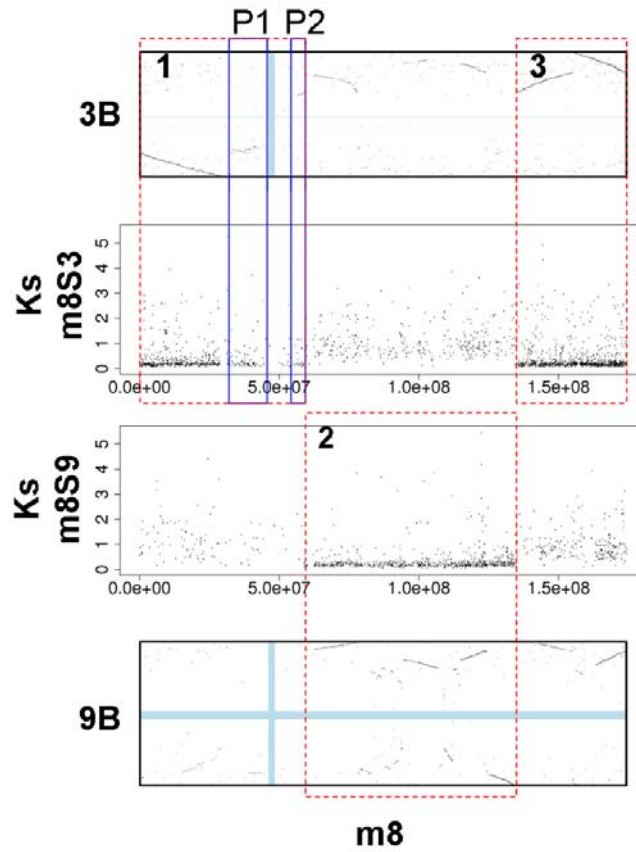

From top to bottom, the 4 subfigures represent a dot plot of all homologous gene pairs (including pairs with  $K_s$  values  $> 0.35$ ) between sorghum chromosome 3 and maize chromosome 8, the  $K_s$  of these gene pairs, the  $K_s$  of all homologous gene pairs between sorghum chromosome 9 and maize chromosome 8 and a dot plot of these gene pairs, respectively. They are aligned according to maize chromosome 8 (X-axes). Based on the  $K_s$  values (see Materials and Methods), region 1 and 3 (red dashed box) are orthologous to s3, while 2 is orthologous to s9. This pattern indicates that m8 originated by insertion of ancestral chromosome 9 into 3. The left and right sides of maize cen3 (light blue vertical bar) showed clear gene synteny (blue boxes P1 and P2) between sorghum and maize, thus the whole-chromosome insertion did not occur into the centromere/pericentromere of ancient chromosome 3, but into the DNA adjacent to it.

Figure S12: Ks values of gene pairs sharing mutual best BLASTP hits between sorghum and maize

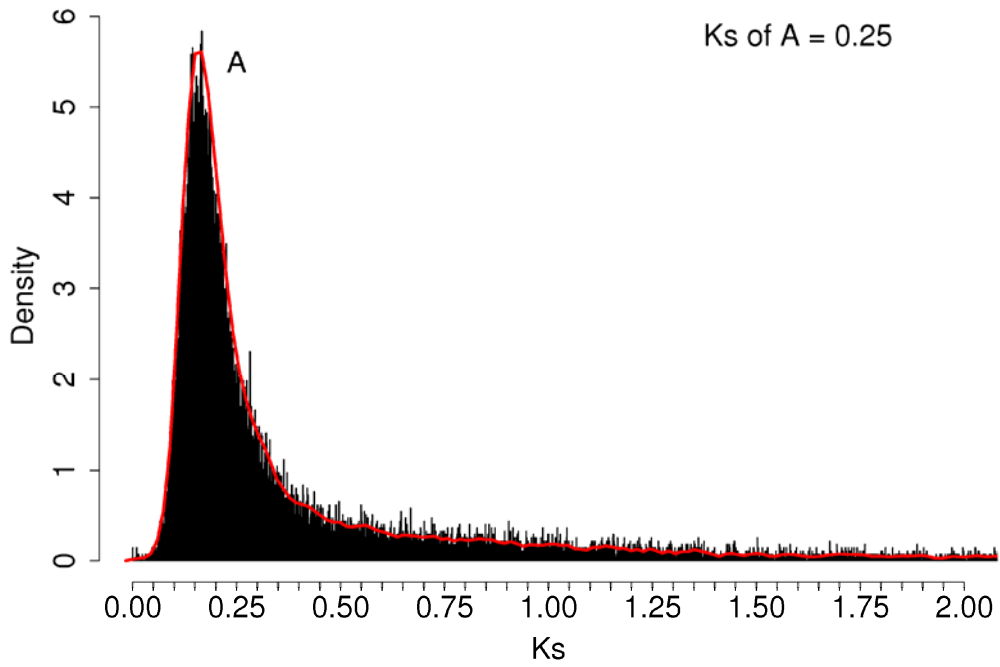

Distribution of Ks values between sorghum and maize protein coding genes exhibits unimodal distribution, with the Ks value of peak A is 0.25. Ks=0.35 includes in the majority of orthologous genes so we use gene pairs of which  $Ks \leq 0.35$  to draw the comparative map.

**Supplemental Table**

Table S1: CSCP Locations in Sorghum and Maize

| <b>Sorghum Chromosome</b> | <b>Start</b> | <b>Stop</b> | <b>Maize Chromosome</b> | <b>Start</b> | <b>Stop</b> | <b>Length in Sorghum</b> | <b>Length in Maize</b> |
|---------------------------|--------------|-------------|-------------------------|--------------|-------------|--------------------------|------------------------|
| Sb10                      | 25697554     | 25697783    | Zm1                     | 37278771     | 37278991    | 230                      | 221                    |
| Sb10                      | 25697367     | 25697548    | Zm1                     | 37279430     | 37279598    | 182                      | 169                    |
| Sb10                      | 25127294     | 25127392    | Zm1                     | 39134881     | 39134951    | 99                       | 71                     |
| Sb10                      | 37959560     | 37959640    | Zm1                     | 120382318    | 120382398   | 81                       | 81                     |
| Sb10                      | 28478363     | 28478427    | Zm1                     | 200341203    | 200341267   | 65                       | 65                     |
| Sb10                      | 37860756     | 37860830    | Zm1                     | 237920381    | 237920432   | 75                       | 52                     |
| Sb10                      | 37860896     | 37860970    | Zm1                     | 237920553    | 237920605   | 75                       | 53                     |
| Sb10                      | 36990971     | 36991113    | Zm1                     | 271852140    | 271852283   | 143                      | 144                    |
| Sb10                      | 38020762     | 38020832    | Zm10                    | 22986099     | 22986143    | 71                       | 45                     |
| Sb10                      | 37558399     | 37558518    | Zm10                    | 41577972     | 41578090    | 120                      | 119                    |
| Sb10                      | 37558004     | 37558097    | Zm10                    | 41579080     | 41579174    | 94                       | 95                     |
| Sb10                      | 37862429     | 37862789    | Zm10                    | 91698115     | 91698463    | 361                      | 349                    |
| Sb10                      | 25125591     | 25125672    | Zm10                    | 105784262    | 105784344   | 82                       | 83                     |
| Sb10                      | 25125753     | 25125950    | Zm10                    | 105784627    | 105784829   | 198                      | 203                    |
| Sb10                      | 27473525     | 27473651    | Zm2                     | 47927751     | 47927877    | 127                      | 127                    |
| Sb10                      | 27479286     | 27479412    | Zm2                     | 47927751     | 47927877    | 127                      | 127                    |
| Sb10                      | 37808366     | 37808522    | Zm2                     | 181631067    | 181631220   | 157                      | 154                    |
| Sb10                      | 37809625     | 37809795    | Zm2                     | 181631523    | 181631693   | 171                      | 171                    |
| Sb10                      | 37811789     | 37811892    | Zm2                     | 181631700    | 181631812   | 104                      | 113                    |
| Sb10                      | 25126212     | 25126291    | Zm2                     | 206691100    | 206691179   | 80                       | 80                     |
| Sb10                      | 35749360     | 35749762    | Zm2                     | 211597125    | 211597527   | 403                      | 403                    |
| Sb10                      | 35749793     | 35749992    | Zm2                     | 211597658    | 211597857   | 200                      | 200                    |
| Sb10                      | 38711093     | 38712924    | Zm3                     | 125712082    | 125713935   | 1832                     | 1854                   |

|      |          |          |     |           |           |     |     |
|------|----------|----------|-----|-----------|-----------|-----|-----|
| Sb10 | 38710934 | 38711023 | Zm3 | 125714007 | 125714096 | 90  | 90  |
| Sb10 | 37556912 | 37556982 | Zm4 | 139127071 | 139127141 | 71  | 71  |
| Sb10 | 28492889 | 28493003 | Zm4 | 174225121 | 174225236 | 115 | 116 |
| Sb10 | 38778211 | 38779148 | Zm4 | 225227484 | 225228424 | 938 | 941 |
| Sb10 | 26765492 | 26765582 | Zm4 | 241297321 | 241297411 | 91  | 91  |
| Sb10 | 37869812 | 37869887 | Zm5 | 69980976  | 69981051  | 76  | 76  |
| Sb10 | 28302468 | 28302575 | Zm5 | 75991664  | 75991723  | 108 | 60  |
| Sb10 | 37477577 | 37477645 | Zm5 | 211522407 | 211522478 | 69  | 72  |
| Sb10 | 33809544 | 33809669 | Zm5 | 213380010 | 213380136 | 126 | 127 |
| Sb10 | 33464172 | 33464297 | Zm5 | 213380010 | 213380136 | 126 | 127 |
| Sb10 | 33553179 | 33553304 | Zm5 | 213380010 | 213380136 | 126 | 127 |
| Sb10 | 34236554 | 34236678 | Zm5 | 213380010 | 213380136 | 125 | 127 |
| Sb10 | 33393293 | 33393431 | Zm5 | 213380010 | 213380149 | 139 | 140 |
| Sb10 | 34135110 | 34135193 | Zm5 | 213380010 | 213380093 | 84  | 84  |
| Sb10 | 33885683 | 33885808 | Zm5 | 213380010 | 213380136 | 126 | 127 |
| Sb10 | 37817416 | 37817625 | Zm7 | 13713682  | 13713889  | 210 | 208 |
| Sb10 | 38255092 | 38255200 | Zm7 | 121840832 | 121840940 | 109 | 109 |
| Sb10 | 38537362 | 38537728 | Zm7 | 147191325 | 147191693 | 367 | 369 |
| Sb10 | 34054126 | 34054234 | Zm7 | 160131634 | 160131747 | 109 | 114 |
| Sb10 | 35751381 | 35751485 | Zm8 | 7991577   | 7991673   | 105 | 97  |
| Sb10 | 25718237 | 25718332 | Zm8 | 12311327  | 12311361  | 96  | 35  |
| Sb10 | 27085239 | 27085415 | Zm8 | 143328138 | 143328310 | 177 | 173 |
| Sb10 | 28471153 | 28471385 | Zm6 | 107742246 | 107742481 | 233 | 236 |
| Sb10 | 37969643 | 37970111 | Zm6 | 107654583 | 107655049 | 469 | 467 |
| Sb10 | 37961055 | 37961889 | Zm6 | 107662610 | 107663431 | 835 | 822 |
| Sb10 | 27808308 | 27808382 | Zm6 | 107777131 | 107777193 | 75  | 63  |



|      |          |          |     |           |           |      |      |
|------|----------|----------|-----|-----------|-----------|------|------|
| Sb10 | 23661501 | 23661550 | Zm6 | 122385073 | 122385122 | 50   | 50   |
| Sb10 | 37964027 | 37964190 | Zm6 | 107660180 | 107660343 | 164  | 164  |
| Sb10 | 37959817 | 37960783 | Zm6 | 107663484 | 107664438 | 967  | 955  |
| Sb10 | 37968835 | 37968879 | Zm6 | 107655796 | 107655840 | 45   | 45   |
| Sb10 | 23664267 | 23664354 | Zm6 | 122387396 | 122387462 | 88   | 67   |
| Sb10 | 37963647 | 37963982 | Zm6 | 107660372 | 107660698 | 336  | 327  |
| Sb10 | 22330460 | 22330635 | Zm6 | 121827332 | 121827503 | 176  | 172  |
| Sb10 | 22329033 | 22329549 | Zm6 | 121829912 | 121830435 | 517  | 524  |
| Sb10 | 37961894 | 37963642 | Zm6 | 107660790 | 107662483 | 1749 | 1694 |
| Sb10 | 37970712 | 37970752 | Zm6 | 107653635 | 107653675 | 41   | 41   |
| Sb10 | 23665802 | 23665859 | Zm6 | 122388417 | 122388474 | 58   | 58   |
| Sb10 | 28470042 | 28470089 | Zm6 | 107743533 | 107743580 | 48   | 48   |
| Sb10 | 23663777 | 23664237 | Zm6 | 122386906 | 122387393 | 461  | 488  |
| Sb10 | 37965848 | 37965977 | Zm6 | 107658786 | 107658915 | 130  | 130  |
| Sb10 | 37968075 | 37968229 | Zm6 | 107656446 | 107656600 | 155  | 155  |
| Sb10 | 23298704 | 23298766 | Zm6 | 143540733 | 143540795 | 63   | 63   |
| Sb10 | 35927378 | 35927772 | Zm6 | 43335407  | 43335802  | 395  | 396  |
| Sb10 | 23093540 | 23095986 | Zm6 | 122543648 | 122546089 | 2447 | 2442 |
| Sb10 | 22328811 | 22328930 | Zm6 | 121830508 | 121830628 | 120  | 121  |
| Sb10 | 27812405 | 27812746 | Zm6 | 107779594 | 107779920 | 342  | 327  |
| Sb10 | 23101701 | 23101798 | Zm6 | 122533849 | 122533947 | 98   | 99   |
| Sb10 | 22323667 | 22323886 | Zm6 | 121840022 | 121840236 | 220  | 215  |
| Sb10 | 23101122 | 23101263 | Zm6 | 122534407 | 122534485 | 142  | 79   |
| Sb10 | 23180367 | 23180623 | Zm6 | 122475737 | 122475995 | 257  | 259  |
| Sb10 | 23241638 | 23241727 | Zm6 | 122473436 | 122473526 | 90   | 91   |
| Sb10 | 37957739 | 37958416 | Zm6 | 107665853 | 107666528 | 678  | 676  |

|      |          |          |     |           |           |      |      |
|------|----------|----------|-----|-----------|-----------|------|------|
| Sb10 | 37954355 | 37954443 | Zm6 | 107668186 | 107668274 | 89   | 89   |
| Sb10 | 23096017 | 23096528 | Zm6 | 122543143 | 122543647 | 512  | 505  |
| Sb10 | 37967312 | 37967614 | Zm6 | 107657062 | 107657364 | 303  | 303  |
| Sb10 | 23100164 | 23100261 | Zm6 | 122534930 | 122535027 | 98   | 98   |
| Sb10 | 23179602 | 23179950 | Zm6 | 122495528 | 122495867 | 349  | 340  |
| Sb10 | 28470242 | 28471040 | Zm6 | 107742555 | 107743353 | 799  | 799  |
| Sb10 | 37966005 | 37967296 | Zm6 | 107657432 | 107658747 | 1292 | 1316 |
| Sb10 | 37954496 | 37954977 | Zm6 | 107667650 | 107668154 | 482  | 505  |
| Sb10 | 23664903 | 23664980 | Zm6 | 122388018 | 122388095 | 78   | 78   |
| Sb10 | 23098153 | 23098237 | Zm6 | 122537073 | 122537153 | 85   | 81   |
| Sb10 | 23662295 | 23662432 | Zm6 | 122385893 | 122386028 | 138  | 136  |
| Sb10 | 37970423 | 37970646 | Zm6 | 107654063 | 107654289 | 224  | 227  |
| Sb10 | 22329563 | 22329615 | Zm6 | 121828536 | 121828588 | 53   | 53   |
| Sb10 | 27811797 | 27811858 | Zm6 | 107779027 | 107779088 | 62   | 62   |
| Sb10 | 23181719 | 23182889 | Zm6 | 122473812 | 122475000 | 1171 | 1189 |
| Sb10 | 22324621 | 22324777 | Zm6 | 121839155 | 121839309 | 157  | 155  |
| Sb10 | 37967969 | 37968022 | Zm6 | 107656653 | 107656706 | 54   | 54   |
| Sb10 | 23664717 | 23664815 | Zm6 | 122387831 | 122387929 | 99   | 99   |
| Sb10 | 23902031 | 23902085 | Zm6 | 122394143 | 122394197 | 55   | 55   |
| Sb10 | 27810209 | 27810714 | Zm6 | 107778522 | 107779010 | 506  | 489  |
| Sb10 | 23662543 | 23662621 | Zm6 | 122386071 | 122386149 | 79   | 79   |
| Sb10 | 22325220 | 22325315 | Zm6 | 121838976 | 121839069 | 96   | 94   |
| Sb10 | 23099465 | 23100016 | Zm6 | 122535139 | 122535691 | 552  | 553  |
| Sb10 | 22327096 | 22327577 | Zm6 | 121831497 | 121831970 | 482  | 474  |
| Sb10 | 37958514 | 37958991 | Zm6 | 107665260 | 107665735 | 478  | 476  |
| Sb10 | 23180265 | 23180304 | Zm6 | 122476352 | 122476391 | 40   | 40   |

|      |          |          |     |           |           |     |     |
|------|----------|----------|-----|-----------|-----------|-----|-----|
| Sb10 | 22323954 | 22324561 | Zm6 | 121839374 | 121839988 | 608 | 615 |
| Sb10 | 23181469 | 23181627 | Zm6 | 122475165 | 122475323 | 159 | 159 |
| Sb10 | 37985067 | 37985129 | Zm6 | 107630884 | 107630946 | 63  | 63  |
| Sb10 | 23101350 | 23101430 | Zm6 | 122534192 | 122534218 | 81  | 27  |
| Sb10 | 23665954 | 23666134 | Zm6 | 122388527 | 122388707 | 181 | 181 |
| Sb10 | 23663396 | 23663514 | Zm6 | 122386552 | 122386673 | 119 | 122 |
| Sb10 | 37970221 | 37970276 | Zm6 | 107654400 | 107654455 | 56  | 56  |
| Sb10 | 37968361 | 37968397 | Zm6 | 107656278 | 107656314 | 37  | 37  |
| Sb10 | 23097643 | 23097751 | Zm6 | 122537533 | 122537644 | 109 | 112 |
| Sb10 | 23178579 | 23178651 | Zm6 | 122495878 | 122495950 | 73  | 73  |
| Sb10 | 22328213 | 22328631 | Zm6 | 121830806 | 121831221 | 419 | 416 |
| Sb10 | 42781218 | 42781744 | Zm9 | 68242455  | 68242961  | 527 | 507 |
| Sb10 | 41892878 | 41892994 | Zm9 | 53140866  | 53140996  | 117 | 131 |
| Sb10 | 38674123 | 38674300 | Zm9 | 51406422  | 51406600  | 178 | 179 |
| Sb10 | 42815739 | 42816076 | Zm9 | 68207012  | 68207348  | 338 | 337 |
| Sb10 | 38674489 | 38674862 | Zm9 | 51411141  | 51411513  | 374 | 373 |
| Sb10 | 35186787 | 35186838 | Zm9 | 48385263  | 48385314  | 52  | 52  |
| Sb10 | 42218507 | 42218659 | Zm9 | 67572929  | 67573081  | 153 | 153 |
| Sb10 | 25726135 | 25726309 | Zm9 | 51121292  | 51121467  | 175 | 176 |
| Sb10 | 42760437 | 42761150 | Zm9 | 68271313  | 68272016  | 714 | 704 |
| Sb10 | 42251228 | 42251352 | Zm9 | 67529923  | 67530046  | 125 | 124 |
| Sb10 | 42815502 | 42815584 | Zm9 | 68207961  | 68208043  | 83  | 83  |
| Sb10 | 42771878 | 42772220 | Zm9 | 68247129  | 68247468  | 343 | 340 |
| Sb10 | 37890995 | 37891265 | Zm9 | 50782516  | 50782783  | 271 | 268 |
| Sb10 | 42254168 | 42254337 | Zm9 | 67529280  | 67529448  | 170 | 169 |
| Sb10 | 42790176 | 42790367 | Zm9 | 68238739  | 68238933  | 192 | 195 |

|      |          |          |     |          |          |      |      |
|------|----------|----------|-----|----------|----------|------|------|
| Sb10 | 27068529 | 27070297 | Zm9 | 49250291 | 49252062 | 1769 | 1772 |
| Sb10 | 35174619 | 35174872 | Zm9 | 48373867 | 48374106 | 254  | 240  |
| Sb10 | 42830475 | 42831073 | Zm9 | 68193204 | 68193781 | 599  | 578  |
| Sb10 | 42758967 | 42760395 | Zm9 | 68274963 | 68276399 | 1429 | 1437 |
| Sb10 | 35181375 | 35181489 | Zm9 | 48384351 | 48384468 | 115  | 118  |
| Sb10 | 42829857 | 42830159 | Zm9 | 68196483 | 68196770 | 303  | 288  |
| Sb10 | 35243023 | 35243184 | Zm9 | 48514737 | 48514898 | 162  | 162  |
| Sb10 | 37887361 | 37887455 | Zm9 | 50786383 | 50786477 | 95   | 95   |
| Sb10 | 27040503 | 27040739 | Zm9 | 49260896 | 49261133 | 237  | 238  |
| Sb10 | 42795258 | 42795426 | Zm9 | 68226209 | 68226387 | 169  | 179  |
| Sb10 | 35242668 | 35242819 | Zm9 | 48514368 | 48514517 | 152  | 150  |
| Sb10 | 42829068 | 42829850 | Zm9 | 68197334 | 68198112 | 783  | 779  |
| Sb10 | 37990924 | 37991270 | Zm9 | 49458445 | 49458616 | 347  | 172  |
| Sb10 | 42772539 | 42772655 | Zm9 | 68246501 | 68246617 | 117  | 117  |
| Sb10 | 41893403 | 41893734 | Zm9 | 53142197 | 53142458 | 332  | 262  |
| Sb10 | 42253734 | 42253980 | Zm9 | 67529565 | 67529808 | 247  | 244  |
| Sb10 | 42799008 | 42799454 | Zm9 | 68212176 | 68212609 | 447  | 434  |
| Sb10 | 37889805 | 37890060 | Zm9 | 50783552 | 50783802 | 256  | 251  |
| Sb10 | 35152404 | 35153490 | Zm9 | 48355693 | 48356788 | 1087 | 1096 |
| Sb10 | 42799917 | 42800136 | Zm9 | 68210806 | 68210994 | 220  | 189  |
| Sb10 | 37888546 | 37888844 | Zm9 | 50784878 | 50785189 | 299  | 312  |
| Sb10 | 25733049 | 25734085 | Zm9 | 51105714 | 51106743 | 1037 | 1030 |
| Sb10 | 42820375 | 42820865 | Zm9 | 68204420 | 68204911 | 491  | 492  |
| Sb10 | 37888003 | 37888168 | Zm9 | 50785695 | 50785860 | 166  | 166  |
| Sb10 | 35174049 | 35174295 | Zm9 | 48373312 | 48373559 | 247  | 248  |
| Sb10 | 37994206 | 37995042 | Zm9 | 49470469 | 49471312 | 837  | 844  |

|      |          |          |     |          |          |      |      |
|------|----------|----------|-----|----------|----------|------|------|
| Sb10 | 42763145 | 42763360 | Zm9 | 68268158 | 68268379 | 216  | 222  |
| Sb10 | 37995367 | 37995421 | Zm9 | 49471310 | 49471364 | 55   | 55   |
| Sb10 | 41896428 | 41896653 | Zm9 | 53151689 | 53151880 | 226  | 192  |
| Sb10 | 42801683 | 42801835 | Zm9 | 68209028 | 68209168 | 153  | 141  |
| Sb10 | 35138795 | 35139104 | Zm9 | 48351567 | 48351872 | 310  | 306  |
| Sb10 | 38006245 | 38006423 | Zm9 | 49482759 | 49482937 | 179  | 179  |
| Sb10 | 38776144 | 38776189 | Zm9 | 51484230 | 51484275 | 46   | 46   |
| Sb10 | 42227449 | 42228326 | Zm9 | 67568461 | 67569324 | 878  | 864  |
| Sb10 | 42831089 | 42831171 | Zm9 | 68193043 | 68193125 | 83   | 83   |
| Sb10 | 37993360 | 37993415 | Zm9 | 49469298 | 49469353 | 56   | 56   |
| Sb10 | 42236636 | 42237183 | Zm9 | 67559180 | 67559721 | 548  | 542  |
| Sb10 | 35184951 | 35185060 | Zm9 | 48383886 | 48383995 | 110  | 110  |
| Sb10 | 41169879 | 41170447 | Zm9 | 51585129 | 51585693 | 569  | 565  |
| Sb10 | 38299070 | 38300097 | Zm9 | 50254724 | 50255736 | 1028 | 1013 |
| Sb10 | 38674969 | 38675107 | Zm9 | 51411586 | 51411727 | 139  | 142  |
| Sb10 | 37888482 | 37888543 | Zm9 | 50785293 | 50785353 | 62   | 61   |
| Sb10 | 35137930 | 35138614 | Zm9 | 48350445 | 48351127 | 685  | 683  |
| Sb10 | 37989336 | 37989401 | Zm9 | 49450233 | 49450298 | 66   | 66   |
| Sb10 | 35181943 | 35182052 | Zm9 | 48384542 | 48384651 | 110  | 110  |
| Sb10 | 25734373 | 25734646 | Zm9 | 51105273 | 51105533 | 274  | 261  |
| Sb10 | 37988946 | 37989245 | Zm9 | 49449863 | 49450162 | 300  | 300  |
| Sb10 | 38293607 | 38293706 | Zm9 | 50244577 | 50244676 | 100  | 100  |
| Sb10 | 37988695 | 37988847 | Zm9 | 49449564 | 49449717 | 153  | 154  |
| Sb10 | 42227132 | 42227312 | Zm9 | 67569506 | 67569685 | 181  | 180  |
| Sb10 | 42238687 | 42238802 | Zm9 | 67552857 | 67552972 | 116  | 116  |
| Sb10 | 42792052 | 42792290 | Zm9 | 68237116 | 68237354 | 239  | 239  |

|      |          |          |     |           |           |      |      |
|------|----------|----------|-----|-----------|-----------|------|------|
| Sb10 | 42788238 | 42788857 | Zm9 | 68239804  | 68240420  | 620  | 617  |
| Sb10 | 38004935 | 38005115 | Zm9 | 49481494  | 49481674  | 181  | 181  |
| Sb10 | 42798431 | 42799001 | Zm9 | 68217627  | 68218196  | 571  | 570  |
| Sb10 | 35185138 | 35185252 | Zm9 | 48384351  | 48384468  | 115  | 118  |
| Sb10 | 42780994 | 42781029 | Zm9 | 68243148  | 68243183  | 36   | 36   |
| Sb10 | 42831712 | 42831767 | Zm9 | 68190021  | 68190076  | 56   | 56   |
| Sb10 | 41187525 | 41187713 | Zm9 | 100925399 | 100925583 | 189  | 185  |
| Sb10 | 41180013 | 41180079 | Zm9 | 51557767  | 51557833  | 67   | 67   |
| Sb10 | 41166528 | 41166737 | Zm9 | 51590441  | 51590650  | 210  | 210  |
| Sb10 | 42236134 | 42236404 | Zm9 | 67560208  | 67560461  | 271  | 254  |
| Sb10 | 42797891 | 42798299 | Zm9 | 68218539  | 68218947  | 409  | 409  |
| Sb10 | 42821565 | 42822009 | Zm9 | 68201663  | 68202110  | 445  | 448  |
| Sb10 | 42259627 | 42259752 | Zm9 | 67528753  | 67528878  | 126  | 126  |
| Sb10 | 41894583 | 41894779 | Zm9 | 53143497  | 53143702  | 197  | 206  |
| Sb10 | 42793806 | 42794012 | Zm9 | 68227361  | 68227560  | 207  | 200  |
| Sb10 | 42832181 | 42832355 | Zm9 | 68189715  | 68189846  | 175  | 132  |
| Sb10 | 38001641 | 38001923 | Zm9 | 49475734  | 49476009  | 283  | 276  |
| Sb10 | 38675169 | 38675236 | Zm9 | 51411790  | 51411856  | 68   | 67   |
| Sb10 | 35153992 | 35154200 | Zm9 | 48359276  | 48359411  | 209  | 136  |
| Sb10 | 42218759 | 42219145 | Zm9 | 67572447  | 67572829  | 387  | 383  |
| Sb10 | 37995452 | 37995831 | Zm9 | 49471380  | 49471766  | 380  | 387  |
| Sb10 | 41893749 | 41894511 | Zm9 | 53142615  | 53143390  | 763  | 776  |
| Sb10 | 42781109 | 42781192 | Zm9 | 68243016  | 68243099  | 84   | 84   |
| Sb10 | 42219929 | 42221757 | Zm9 | 67569893  | 67571704  | 1829 | 1812 |
| Sb10 | 37990076 | 37990235 | Zm9 | 49450958  | 49451079  | 160  | 122  |
| Sb10 | 42792856 | 42793774 | Zm9 | 68233370  | 68234282  | 919  | 913  |

|      |          |          |     |          |          |      |      |
|------|----------|----------|-----|----------|----------|------|------|
| Sb10 | 42831258 | 42831317 | Zm9 | 68192939 | 68192987 | 60   | 49   |
| Sb10 | 38290242 | 38290647 | Zm9 | 50234837 | 50235236 | 406  | 400  |
| Sb10 | 42235209 | 42236107 | Zm9 | 67560682 | 67561580 | 899  | 899  |
| Sb10 | 35154417 | 35154804 | Zm9 | 48360290 | 48360674 | 388  | 385  |
| Sb10 | 42765188 | 42765297 | Zm9 | 68266483 | 68266591 | 110  | 109  |
| Sb10 | 42765720 | 42766778 | Zm9 | 68264873 | 68265920 | 1059 | 1048 |
| Sb10 | 42831326 | 42831378 | Zm9 | 68191458 | 68191510 | 53   | 53   |
| Sb10 | 41895718 | 41896389 | Zm9 | 53145073 | 53145749 | 672  | 677  |
| Sb10 | 42770586 | 42770880 | Zm9 | 68253972 | 68254266 | 295  | 295  |
| Sb10 | 38676729 | 38676971 | Zm9 | 51413271 | 51413507 | 243  | 237  |
| Sb10 | 35186068 | 35186682 | Zm9 | 48384542 | 48385167 | 615  | 626  |
| Sb10 | 42765425 | 42765531 | Zm9 | 68266283 | 68266388 | 107  | 106  |
| Sb10 | 42808482 | 42809095 | Zm9 | 68208199 | 68208789 | 614  | 591  |
| Sb10 | 42249712 | 42250203 | Zm9 | 67549125 | 67549628 | 492  | 504  |
| Sb10 | 35160684 | 35161157 | Zm9 | 48362570 | 48363043 | 474  | 474  |
| Sb10 | 42235008 | 42235180 | Zm9 | 67561580 | 67561752 | 173  | 173  |
| Sb10 | 42801167 | 42801657 | Zm9 | 68209169 | 68209663 | 491  | 495  |
| Sb10 | 42772816 | 42773210 | Zm9 | 68245565 | 68245954 | 395  | 390  |
| Sb10 | 42219741 | 42219812 | Zm9 | 67571823 | 67571878 | 72   | 56   |
| Sb10 | 41929429 | 41929604 | Zm9 | 52493613 | 52493788 | 176  | 176  |
| Sb10 | 37991348 | 37991504 | Zm9 | 49459421 | 49459572 | 157  | 152  |
| Sb10 | 42218315 | 42218376 | Zm9 | 67573205 | 67573263 | 62   | 59   |
| Sb10 | 25726321 | 25727423 | Zm9 | 51114007 | 51115109 | 1103 | 1103 |
| Sb10 | 35241971 | 35242288 | Zm9 | 48513144 | 48513444 | 318  | 301  |
| Sb10 | 42823532 | 42823708 | Zm9 | 68198183 | 68198352 | 177  | 170  |
| Sb10 | 25734649 | 25735052 | Zm9 | 51104845 | 51105247 | 404  | 403  |

|      |          |          |     |          |          |     |     |
|------|----------|----------|-----|----------|----------|-----|-----|
| Sb10 | 41166885 | 41167723 | Zm9 | 51589456 | 51590296 | 839 | 841 |
| Sb10 | 42761181 | 42761432 | Zm9 | 68270716 | 68270959 | 252 | 244 |
| Sb10 | 42821017 | 42821445 | Zm9 | 68202124 | 68202545 | 429 | 422 |
| Sb10 | 35181188 | 35181297 | Zm9 | 48383886 | 48383995 | 110 | 110 |
| Sb10 | 42764081 | 42764195 | Zm9 | 68267025 | 68267138 | 115 | 114 |
| Sb10 | 42778818 | 42779369 | Zm9 | 68245026 | 68245570 | 552 | 545 |
| Sb10 | 42781750 | 42781928 | Zm9 | 68242297 | 68242472 | 179 | 176 |
| Sb10 | 42802440 | 42802587 | Zm9 | 68209028 | 68209163 | 148 | 136 |
| Sb10 | 42259894 | 42260463 | Zm9 | 67528156 | 67528712 | 570 | 557 |
| Sb10 | 42816100 | 42816285 | Zm9 | 68206826 | 68207011 | 186 | 186 |
| Sb10 | 37993079 | 37993258 | Zm9 | 49469023 | 49469201 | 180 | 179 |
| Sb10 | 37993562 | 37994202 | Zm9 | 49469501 | 49470138 | 641 | 638 |
| Sb10 | 25728031 | 25728316 | Zm9 | 51106770 | 51107056 | 286 | 287 |
| Sb10 | 27813128 | 27813200 | Zm9 | 38298202 | 38298274 | 73  | 73  |
| Sb10 | 42772695 | 42772812 | Zm9 | 68246343 | 68246459 | 118 | 117 |
| Sb10 | 42832615 | 42832773 | Zm9 | 68189262 | 68189413 | 159 | 152 |
| Sb10 | 38290909 | 38291398 | Zm9 | 50235239 | 50235731 | 490 | 493 |
| Sb10 | 42780685 | 42780916 | Zm9 | 68243806 | 68244042 | 232 | 237 |
| Sb10 | 37895269 | 37895371 | Zm9 | 50658576 | 50658681 | 103 | 106 |
| Sb10 | 42790460 | 42790569 | Zm9 | 68238497 | 68238608 | 110 | 112 |
| Sb10 | 27060443 | 27060938 | Zm9 | 49258628 | 49259125 | 496 | 498 |
| Sb10 | 38294614 | 38294709 | Zm9 | 50254442 | 50254533 | 96  | 92  |
| Sb10 | 42261121 | 42261210 | Zm9 | 66139150 | 66139237 | 90  | 88  |
| Sb10 | 38775749 | 38775975 | Zm9 | 51483836 | 51484066 | 227 | 231 |
| Sb10 | 35241487 | 35241675 | Zm9 | 48512696 | 48512881 | 189 | 186 |
| Sb10 | 38291807 | 38292123 | Zm9 | 50235757 | 50236063 | 317 | 307 |



|      |          |          |     |          |          |     |     |
|------|----------|----------|-----|----------|----------|-----|-----|
| Sb10 | 37888255 | 37888329 | Zm9 | 50785561 | 50785635 | 75  | 75  |
| Sb10 | 41958010 | 41958108 | Zm9 | 52317560 | 52317658 | 99  | 99  |
| Sb10 | 42802275 | 42802388 | Zm9 | 68208915 | 68209024 | 114 | 110 |
| Sb10 | 37775543 | 37776028 | Zm9 | 50833004 | 50833489 | 486 | 486 |
| Sb10 | 35154206 | 35154277 | Zm9 | 48360090 | 48360161 | 72  | 72  |
| Sb10 | 42794022 | 42794402 | Zm9 | 68226809 | 68227181 | 381 | 373 |
| Sb10 | 42228333 | 42228461 | Zm9 | 67567276 | 67567382 | 129 | 107 |
| Sb10 | 42831420 | 42831698 | Zm9 | 68191159 | 68191437 | 279 | 279 |
| Sb10 | 37996071 | 37996484 | Zm9 | 49471769 | 49472180 | 414 | 412 |
| Sb10 | 27067765 | 27068374 | Zm9 | 49252220 | 49252837 | 610 | 618 |
| Sb10 | 41326837 | 41326933 | Zm9 | 20745445 | 20745541 | 97  | 97  |
| Sb10 | 41948796 | 41948905 | Zm9 | 52318236 | 52318350 | 110 | 115 |
| Sb10 | 42794464 | 42794791 | Zm9 | 68226404 | 68226747 | 328 | 344 |
| Sb10 | 38002380 | 38002598 | Zm9 | 49476427 | 49476650 | 219 | 224 |
| Sb10 | 41893188 | 41893394 | Zm9 | 53141176 | 53141380 | 207 | 205 |
| Sb10 | 38003525 | 38003682 | Zm9 | 49480490 | 49480647 | 158 | 158 |
| Sb10 | 42254345 | 42254591 | Zm9 | 67528908 | 67529148 | 247 | 241 |
| Sb10 | 38002754 | 38003311 | Zm9 | 49479895 | 49480445 | 558 | 551 |
| Sb10 | 27039307 | 27039474 | Zm9 | 49262014 | 49262181 | 168 | 168 |
| Sb10 | 41929780 | 41930316 | Zm9 | 52492925 | 52493461 | 537 | 537 |
| Sb10 | 35136718 | 35136868 | Zm9 | 48349648 | 48349792 | 151 | 145 |
| Sb10 | 42766780 | 42767358 | Zm9 | 68264119 | 68264703 | 579 | 585 |
| Sb10 | 38675400 | 38675511 | Zm9 | 51412002 | 51412113 | 112 | 112 |
| Sb10 | 42761727 | 42762641 | Zm9 | 68268989 | 68269888 | 915 | 900 |
| Sb10 | 41957766 | 41957929 | Zm9 | 52317749 | 52317911 | 164 | 163 |
| Sb10 | 37990496 | 37990869 | Zm9 | 49451407 | 49451754 | 374 | 348 |

|      |          |          |     |           |           |      |      |
|------|----------|----------|-----|-----------|-----------|------|------|
| Sb10 | 41892628 | 41892801 | Zm9 | 53140462  | 53140638  | 174  | 177  |
| Sb10 | 42236422 | 42236617 | Zm9 | 67559859  | 67560029  | 196  | 171  |
| Sb10 | 41311505 | 41311646 | Zm9 | 138631577 | 138631719 | 142  | 143  |
| Sb10 | 42808248 | 42808436 | Zm9 | 68208822  | 68209007  | 189  | 186  |
| Sb10 | 41892083 | 41892597 | Zm9 | 53139965  | 53140460  | 515  | 496  |
| Sb1  | 39037757 | 39037978 | Zm5 | 38978226  | 38978446  | 222  | 221  |
| Sb1  | 39036875 | 39036961 | Zm5 | 38977265  | 38977351  | 87   | 87   |
| Sb1  | 39517510 | 39517852 | Zm5 | 37881455  | 37881812  | 343  | 358  |
| Sb1  | 39904836 | 39905037 | Zm5 | 207755554 | 207755622 | 202  | 69   |
| Sb1  | 39506113 | 39506146 | Zm5 | 37887286  | 37887319  | 34   | 34   |
| Sb1  | 39510858 | 39511078 | Zm5 | 37882511  | 37882727  | 221  | 217  |
| Sb1  | 39034227 | 39034393 | Zm5 | 156501949 | 156502116 | 167  | 168  |
| Sb1  | 40895244 | 40895385 | Zm1 | 125514862 | 125515003 | 142  | 142  |
| Sb1  | 39497607 | 39497688 | Zm5 | 37889209  | 37889288  | 82   | 80   |
| Sb1  | 39505670 | 39505792 | Zm5 | 37887657  | 37887779  | 123  | 123  |
| Sb1  | 39505357 | 39505476 | Zm5 | 37887973  | 37888094  | 120  | 122  |
| Sb1  | 40668744 | 40669150 | Zm1 | 124679638 | 124680040 | 407  | 403  |
| Sb1  | 38936457 | 38936501 | Zm1 | 123487533 | 123487577 | 45   | 45   |
| Sb1  | 39524323 | 39524651 | Zm5 | 37879699  | 37880025  | 329  | 327  |
| Sb1  | 39497443 | 39497490 | Zm5 | 37889356  | 37889403  | 48   | 48   |
| Sb1  | 39913805 | 39913890 | Zm1 | 199850181 | 199850264 | 86   | 84   |
| Sb1  | 40258198 | 40259895 | Zm5 | 39109812  | 39111522  | 1698 | 1711 |
| Sb1  | 39751422 | 39751737 | Zm6 | 48499492  | 48499815  | 316  | 324  |
| Sb1  | 40666065 | 40666431 | Zm1 | 124673778 | 124674138 | 367  | 361  |
| Sb1  | 40895466 | 40895665 | Zm1 | 125515346 | 125515566 | 200  | 221  |
| Sb1  | 39896621 | 39896996 | Zm6 | 48499898  | 48500220  | 376  | 323  |

|     |          |          |      |           |           |     |     |
|-----|----------|----------|------|-----------|-----------|-----|-----|
| Sb1 | 40144666 | 40144750 | Zm5  | 38167825  | 38167909  | 85  | 85  |
| Sb1 | 39286714 | 39286862 | Zm10 | 129862019 | 129862113 | 149 | 95  |
| Sb1 | 39895229 | 39895534 | Zm6  | 48500785  | 48501020  | 306 | 236 |
| Sb1 | 40153182 | 40153703 | Zm5  | 38155831  | 38156360  | 522 | 530 |
| Sb1 | 39509479 | 39509546 | Zm5  | 37883987  | 37884043  | 68  | 57  |
| Sb1 | 40148964 | 40149353 | Zm5  | 38164191  | 38164575  | 390 | 385 |
| Sb1 | 39506468 | 39506628 | Zm5  | 37886928  | 37887088  | 161 | 161 |
| Sb1 | 39509828 | 39510179 | Zm5  | 37883382  | 37883733  | 352 | 352 |
| Sb1 | 40658890 | 40658968 | Zm1  | 124660902 | 124660982 | 79  | 81  |
| Sb1 | 39527847 | 39527944 | Zm5  | 37877478  | 37877571  | 98  | 94  |
| Sb1 | 39865431 | 39865498 | Zm5  | 2748153   | 2748220   | 68  | 68  |
| Sb1 | 39497324 | 39497401 | Zm5  | 37889459  | 37889540  | 78  | 82  |
| Sb1 | 39529224 | 39529288 | Zm6  | 49115547  | 49115611  | 65  | 65  |
| Sb1 | 40668533 | 40668742 | Zm1  | 124676995 | 124677204 | 210 | 210 |
| Sb1 | 39895644 | 39895793 | Zm6  | 48500587  | 48500740  | 150 | 154 |
| Sb1 | 40150344 | 40150442 | Zm5  | 38159783  | 38159882  | 99  | 100 |
| Sb1 | 39517896 | 39518780 | Zm5  | 37880530  | 37881409  | 885 | 880 |
| Sb1 | 39039171 | 39039488 | Zm5  | 38980014  | 38980331  | 318 | 318 |
| Sb1 | 39038008 | 39038387 | Zm5  | 38978492  | 38978857  | 380 | 366 |
| Sb1 | 40660398 | 40661046 | Zm1  | 124672800 | 124673448 | 649 | 649 |
| Sb1 | 40253145 | 40253874 | Zm5  | 39111541  | 39112267  | 730 | 727 |
| Sb1 | 40659935 | 40660101 | Zm1  | 124670428 | 124670594 | 167 | 167 |
| Sb1 | 39752169 | 39752371 | Zm6  | 48498741  | 48498913  | 203 | 173 |
| Sb1 | 39897837 | 39898039 | Zm6  | 48498741  | 48498913  | 203 | 173 |
| Sb1 | 39897090 | 39897405 | Zm6  | 48499492  | 48499815  | 316 | 324 |
| Sb1 | 40667394 | 40668199 | Zm1  | 124675706 | 124676505 | 806 | 800 |

|     |          |          |      |           |           |     |     |
|-----|----------|----------|------|-----------|-----------|-----|-----|
| Sb1 | 40666638 | 40666830 | Zm1  | 124674651 | 124674836 | 193 | 186 |
| Sb1 | 40669238 | 40669388 | Zm1  | 124680104 | 124680251 | 151 | 148 |
| Sb1 | 40149902 | 40150036 | Zm5  | 38159900  | 38160034  | 135 | 135 |
| Sb1 | 39037366 | 39037507 | Zm5  | 38977805  | 38977945  | 142 | 141 |
| Sb1 | 40260020 | 40260973 | Zm5  | 39108743  | 39109711  | 954 | 969 |
| Sb1 | 39527025 | 39527781 | Zm5  | 37877574  | 37878326  | 757 | 753 |
| Sb1 | 39511128 | 39511752 | Zm5  | 37881820  | 37882463  | 625 | 644 |
| Sb1 | 39504521 | 39504637 | Zm5  | 37888507  | 37888624  | 117 | 118 |
| Sb1 | 40151183 | 40151786 | Zm5  | 38158804  | 38159435  | 604 | 632 |
| Sb1 | 40897926 | 40898037 | Zm1  | 125518216 | 125518324 | 112 | 109 |
| Sb1 | 39751101 | 39751382 | Zm6  | 48499844  | 48500125  | 282 | 282 |
| Sb1 | 38934884 | 38935062 | Zm1  | 123488366 | 123488544 | 179 | 179 |
| Sb1 | 40658986 | 40659062 | Zm1  | 124661050 | 124661096 | 77  | 47  |
| Sb1 | 40665834 | 40665918 | Zm1  | 124673476 | 124673560 | 85  | 85  |
| Sb1 | 39503307 | 39503546 | Zm5  | 37888902  | 37889142  | 240 | 241 |
| Sb1 | 39046843 | 39047538 | Zm5  | 38983604  | 38984300  | 696 | 697 |
| Sb1 | 39037025 | 39037320 | Zm5  | 38977420  | 38977714  | 296 | 295 |
| Sb1 | 39035835 | 39035949 | Zm1  | 237920139 | 237920253 | 115 | 115 |
| Sb1 | 38825946 | 38826107 | Zm8  | 93558804  | 93558965  | 162 | 162 |
| Sb1 | 33684605 | 33684752 | Zm3  | 19790800  | 19790946  | 148 | 147 |
| Sb1 | 39286292 | 39286661 | Zm10 | 129861550 | 129861916 | 370 | 367 |
| Sb1 | 38936813 | 38936886 | Zm1  | 123486984 | 123487057 | 74  | 74  |
| Sb1 | 39891438 | 39891509 | Zm8  | 32568720  | 32568792  | 72  | 73  |
| Sb1 | 40145512 | 40145632 | Zm5  | 38165899  | 38166020  | 121 | 122 |
| Sb1 | 39749028 | 39749367 | Zm6  | 48501451  | 48501776  | 340 | 326 |
| Sb1 | 39045175 | 39045902 | Zm5  | 38981744  | 38982475  | 728 | 732 |

|     |          |          |     |           |           |     |     |
|-----|----------|----------|-----|-----------|-----------|-----|-----|
| Sb1 | 39904244 | 39904281 | Zm5 | 191537297 | 191537331 | 38  | 35  |
| Sb1 | 38936253 | 38936331 | Zm1 | 123487672 | 123487748 | 79  | 77  |
| Sb1 | 40897399 | 40897655 | Zm1 | 125517671 | 125517935 | 257 | 265 |
| Sb1 | 40896941 | 40897125 | Zm1 | 125517220 | 125517338 | 185 | 119 |
| Sb1 | 39749557 | 39749863 | Zm6 | 48500785  | 48501020  | 307 | 236 |
| Sb1 | 39894701 | 39895039 | Zm6 | 48501451  | 48501776  | 339 | 326 |
| Sb1 | 39534265 | 39534401 | Zm1 | 298523577 | 298523712 | 137 | 136 |
| Sb1 | 40665922 | 40666000 | Zm1 | 124673633 | 124673716 | 79  | 84  |
| Sb1 | 39504824 | 39505225 | Zm5 | 37888226  | 37888624  | 402 | 399 |
| Sb1 | 39749973 | 39750122 | Zm6 | 48500587  | 48500740  | 150 | 154 |
| Sb1 | 39037527 | 39037640 | Zm5 | 38977996  | 38978104  | 114 | 109 |
| Sb1 | 39035180 | 39035394 | Zm1 | 237920553 | 237920765 | 215 | 213 |
| Sb1 | 40261004 | 40261119 | Zm5 | 39108622  | 39108738  | 116 | 117 |
| Sb1 | 39518911 | 39519288 | Zm5 | 37880022  | 37880396  | 378 | 375 |
| Sb1 | 39509714 | 39509784 | Zm5 | 37883751  | 37883819  | 71  | 69  |
| Sb1 | 40151944 | 40152085 | Zm5 | 38157855  | 38157993  | 142 | 139 |
| Sb1 | 39507037 | 39507238 | Zm5 | 37886316  | 37886509  | 202 | 194 |
| Sb1 | 39047592 | 39048141 | Zm5 | 38984309  | 38984858  | 550 | 550 |
| Sb1 | 39046015 | 39046758 | Zm5 | 38982571  | 38983312  | 744 | 742 |
| Sb1 | 39895885 | 39895940 | Zm6 | 48500462  | 48500517  | 56  | 56  |
| Sb1 | 40666873 | 40667321 | Zm1 | 124674944 | 124675392 | 449 | 449 |
| Sb1 | 38936009 | 38936120 | Zm1 | 123487909 | 123487971 | 112 | 63  |
| Sb1 | 32889076 | 32889201 | Zm1 | 139992433 | 139992550 | 126 | 118 |
| Sb1 | 32889534 | 32889616 | Zm1 | 139993110 | 139993143 | 83  | 34  |
| Sb1 | 32889725 | 32889799 | Zm1 | 139993252 | 139993326 | 75  | 75  |
| Sb1 | 32889847 | 32889938 | Zm1 | 139993607 | 139993696 | 92  | 90  |

|     |          |          |     |           |           |      |      |
|-----|----------|----------|-----|-----------|-----------|------|------|
| Sb1 | 32890532 | 32890809 | Zm1 | 139994275 | 139994547 | 278  | 273  |
| Sb1 | 32891059 | 32891115 | Zm1 | 139994803 | 139994845 | 57   | 43   |
| Sb1 | 32892194 | 32892898 | Zm1 | 139995955 | 139996678 | 705  | 724  |
| Sb1 | 32893112 | 32893344 | Zm1 | 139996893 | 139997128 | 233  | 236  |
| Sb1 | 32893447 | 32893829 | Zm1 | 139997258 | 139997635 | 383  | 378  |
| Sb1 | 32893901 | 32893936 | Zm1 | 139997706 | 139997741 | 36   | 36   |
| Sb1 | 32499583 | 32499752 | Zm1 | 140455486 | 140455655 | 170  | 170  |
| Sb1 | 32496692 | 32496745 | Zm1 | 140456682 | 140456733 | 54   | 52   |
| Sb1 | 32496157 | 32496366 | Zm1 | 140457033 | 140457242 | 210  | 210  |
| Sb1 | 32495841 | 32495929 | Zm1 | 140457461 | 140457537 | 89   | 77   |
| Sb1 | 32495556 | 32495675 | Zm1 | 140457614 | 140457733 | 120  | 120  |
| Sb1 | 32494672 | 32494742 | Zm1 | 140458151 | 140458222 | 71   | 72   |
| Sb1 | 32494476 | 32494571 | Zm1 | 140458318 | 140458414 | 96   | 97   |
| Sb2 | 37088230 | 37088360 | Zm2 | 152295872 | 152295998 | 131  | 127  |
| Sb2 | 39483999 | 39484411 | Zm7 | 61312843  | 61313252  | 413  | 410  |
| Sb2 | 29966487 | 29966549 | Zm5 | 18473545  | 18473603  | 63   | 59   |
| Sb2 | 44073086 | 44073144 | Zm2 | 159028382 | 159028441 | 59   | 60   |
| Sb2 | 37832723 | 37832783 | Zm1 | 260779817 | 260779877 | 61   | 61   |
| Sb2 | 37098314 | 37098421 | Zm2 | 152285050 | 152285157 | 108  | 108  |
| Sb2 | 29921689 | 29921715 | Zm7 | 62111432  | 62111457  | 27   | 26   |
| Sb2 | 31145572 | 31145608 | Zm7 | 65339173  | 65339209  | 37   | 37   |
| Sb2 | 37114009 | 37118928 | Zm2 | 152272755 | 152277662 | 4920 | 4908 |
| Sb2 | 45091453 | 45091540 | Zm6 | 147593242 | 147593330 | 88   | 89   |
| Sb2 | 44072669 | 44072972 | Zm2 | 159028567 | 159028870 | 304  | 304  |
| Sb2 | 26298813 | 26299017 | Zm7 | 51444920  | 51445124  | 205  | 205  |
| Sb2 | 37096907 | 37097066 | Zm3 | 156253385 | 156253544 | 160  | 160  |

|     |          |          |      |           |           |     |     |
|-----|----------|----------|------|-----------|-----------|-----|-----|
| Sb2 | 26298710 | 26298767 | Zm7  | 51445176  | 51445233  | 58  | 58  |
| Sb2 | 41906367 | 41906550 | Zm6  | 86156767  | 86156951  | 184 | 185 |
| Sb2 | 44075793 | 44076713 | Zm2  | 159022636 | 159023531 | 921 | 896 |
| Sb2 | 37378192 | 37378280 | Zm8  | 90185817  | 90185908  | 89  | 92  |
| Sb2 | 45426064 | 45426470 | Zm7  | 60447266  | 60447669  | 407 | 404 |
| Sb2 | 27811906 | 27811984 | Zm7  | 49728257  | 49728335  | 79  | 79  |
| Sb2 | 25304967 | 25305076 | Zm2  | 158622048 | 158622158 | 110 | 111 |
| Sb2 | 45949844 | 45950115 | Zm2  | 168868118 | 168868386 | 272 | 269 |
| Sb2 | 31155018 | 31155076 | Zm7  | 65347806  | 65347864  | 59  | 59  |
| Sb2 | 45391442 | 45391706 | Zm2  | 150988603 | 150988864 | 265 | 262 |
| Sb2 | 27374957 | 27375021 | Zm2  | 160564818 | 160564882 | 65  | 65  |
| Sb2 | 27810980 | 27811045 | Zm7  | 49729122  | 49729187  | 66  | 66  |
| Sb2 | 45982744 | 45982818 | Zm2  | 168948302 | 168948376 | 75  | 75  |
| Sb2 | 40527496 | 40527824 | Zm7  | 63952482  | 63952808  | 329 | 327 |
| Sb2 | 25872622 | 25872672 | Zm7  | 50763910  | 50763960  | 51  | 51  |
| Sb2 | 45151730 | 45151790 | Zm7  | 63182719  | 63182776  | 61  | 58  |
| Sb2 | 27599880 | 27599928 | Zm9  | 121676408 | 121676456 | 49  | 49  |
| Sb2 | 37820853 | 37821696 | Zm2  | 151792260 | 151793103 | 844 | 844 |
| Sb2 | 25303137 | 25303193 | Zm5  | 129398806 | 129398862 | 57  | 57  |
| Sb2 | 26300903 | 26301146 | Zm7  | 51444166  | 51444408  | 244 | 243 |
| Sb2 | 42666968 | 42667045 | Zm7  | 91563930  | 91564001  | 78  | 72  |
| Sb2 | 41907898 | 41908076 | Zm10 | 17172840  | 17172979  | 179 | 140 |
| Sb2 | 39485823 | 39486288 | Zm7  | 61303873  | 61304359  | 466 | 487 |
| Sb2 | 26310669 | 26310754 | Zm7  | 51422323  | 51422406  | 86  | 84  |
| Sb2 | 40417488 | 40417587 | Zm7  | 141322255 | 141322349 | 100 | 95  |
| Sb2 | 27847719 | 27847783 | Zm7  | 64940358  | 64940423  | 65  | 66  |

|     |          |          |      |           |           |      |      |
|-----|----------|----------|------|-----------|-----------|------|------|
| Sb2 | 37347275 | 37347504 | Zm1  | 164499848 | 164500072 | 230  | 225  |
| Sb2 | 41385263 | 41385340 | Zm3  | 165227854 | 165227933 | 78   | 80   |
| Sb2 | 39152116 | 39152205 | Zm10 | 147425472 | 147425561 | 90   | 90   |
| Sb2 | 45982865 | 45985326 | Zm2  | 168948378 | 168950853 | 2462 | 2476 |
| Sb2 | 27588054 | 27588409 | Zm2  | 160598014 | 160598338 | 356  | 325  |
| Sb2 | 27850530 | 27850582 | Zm7  | 64942592  | 64942644  | 53   | 53   |
| Sb2 | 38879327 | 38879507 | Zm7  | 61303818  | 61303993  | 181  | 176  |
| Sb2 | 40352930 | 40353102 | Zm1  | 215885909 | 215886081 | 173  | 173  |
| Sb2 | 44093744 | 44093810 | Zm2  | 159015089 | 159015141 | 67   | 53   |
| Sb2 | 45978794 | 45978875 | Zm2  | 168944072 | 168944153 | 82   | 82   |
| Sb2 | 37841087 | 37841184 | Zm2  | 151796776 | 151796870 | 98   | 95   |
| Sb2 | 26292622 | 26292941 | Zm7  | 51445326  | 51445637  | 320  | 312  |
| Sb2 | 45145954 | 45146053 | Zm8  | 8616508   | 8616607   | 100  | 100  |
| Sb2 | 27847360 | 27847614 | Zm7  | 64940031  | 64940294  | 255  | 264  |
| Sb2 | 31139594 | 31140079 | Zm7  | 65332091  | 65332577  | 486  | 487  |
| Sb2 | 27378405 | 27378498 | Zm2  | 160566926 | 160567020 | 94   | 95   |
| Sb2 | 43358151 | 43358305 | Zm1  | 22671929  | 22672063  | 155  | 135  |
| Sb2 | 45991258 | 45991337 | Zm2  | 168952668 | 168952747 | 80   | 80   |
| Sb2 | 25356120 | 25356531 | Zm2  | 158563125 | 158563537 | 412  | 413  |
| Sb2 | 40530121 | 40530255 | Zm7  | 63950058  | 63950194  | 135  | 137  |
| Sb2 | 37110277 | 37110813 | Zm2  | 152280349 | 152280897 | 537  | 549  |
| Sb2 | 25356570 | 25357165 | Zm2  | 158562516 | 158563114 | 596  | 599  |
| Sb2 | 25327663 | 25328080 | Zm2  | 158589967 | 158590386 | 418  | 420  |
| Sb2 | 27225144 | 27225209 | Zm7  | 51899288  | 51899353  | 66   | 66   |
| Sb2 | 29921797 | 29922176 | Zm7  | 62110956  | 62111337  | 380  | 382  |
| Sb2 | 28689220 | 28689401 | Zm2  | 160112140 | 160112325 | 182  | 186  |



|     |          |          |     |           |           |      |      |
|-----|----------|----------|-----|-----------|-----------|------|------|
| Sb2 | 45889901 | 45890164 | Zm2 | 153164172 | 153164432 | 264  | 261  |
| Sb2 | 28686479 | 28686650 | Zm2 | 160114627 | 160114787 | 172  | 161  |
| Sb2 | 27813055 | 27813112 | Zm7 | 49727126  | 49727183  | 58   | 58   |
| Sb2 | 43357942 | 43358037 | Zm1 | 22671696  | 22671775  | 96   | 80   |
| Sb2 | 45447734 | 45448074 | Zm2 | 153406821 | 153407150 | 341  | 330  |
| Sb2 | 41908473 | 41908529 | Zm9 | 141691516 | 141691561 | 57   | 46   |
| Sb2 | 27136558 | 27136649 | Zm7 | 165775669 | 165775762 | 92   | 94   |
| Sb2 | 39964341 | 39964672 | Zm7 | 64200149  | 64200483  | 332  | 335  |
| Sb2 | 25345501 | 25345688 | Zm2 | 158585684 | 158585864 | 188  | 181  |
| Sb2 | 45972564 | 45972655 | Zm2 | 168939427 | 168939518 | 92   | 92   |
| Sb2 | 45992929 | 45993145 | Zm2 | 168955901 | 168956125 | 217  | 225  |
| Sb2 | 39958008 | 39958110 | Zm7 | 64202548  | 64202650  | 103  | 103  |
| Sb2 | 29516085 | 29516254 | Zm7 | 62497951  | 62498108  | 170  | 158  |
| Sb2 | 44079169 | 44079717 | Zm2 | 159017331 | 159017863 | 549  | 533  |
| Sb2 | 27811429 | 27811869 | Zm7 | 49728390  | 49728830  | 441  | 441  |
| Sb2 | 27812354 | 27812409 | Zm7 | 49727799  | 49727854  | 56   | 56   |
| Sb2 | 37821769 | 37821966 | Zm2 | 151793207 | 151793414 | 198  | 208  |
| Sb2 | 45989576 | 45989649 | Zm2 | 168951871 | 168951944 | 74   | 74   |
| Sb2 | 37842545 | 37842820 | Zm2 | 151799159 | 151799442 | 276  | 284  |
| Sb2 | 31166011 | 31166097 | Zm7 | 65365845  | 65365931  | 87   | 87   |
| Sb2 | 41387709 | 41387869 | Zm5 | 15056843  | 15057003  | 161  | 161  |
| Sb2 | 37842921 | 37843142 | Zm2 | 151799560 | 151799785 | 222  | 226  |
| Sb2 | 27810722 | 27810837 | Zm7 | 49729288  | 49729405  | 116  | 118  |
| Sb2 | 31146720 | 31146874 | Zm7 | 65341609  | 65341758  | 155  | 150  |
| Sb2 | 45135956 | 45136108 | Zm3 | 193829864 | 193830016 | 153  | 153  |
| Sb2 | 45991356 | 45992644 | Zm2 | 168953044 | 168954341 | 1289 | 1298 |

|     |          |          |     |           |           |     |     |
|-----|----------|----------|-----|-----------|-----------|-----|-----|
| Sb2 | 26336362 | 26336551 | Zm1 | 38252201  | 38252390  | 190 | 190 |
| Sb2 | 45891953 | 45892119 | Zm2 | 153166874 | 153167042 | 167 | 169 |
| Sb2 | 25581951 | 25581993 | Zm3 | 3666615   | 3666657   | 43  | 43  |
| Sb2 | 45150189 | 45150305 | Zm2 | 151055975 | 151056087 | 117 | 113 |
| Sb2 | 45892122 | 45892223 | Zm2 | 153167132 | 153167220 | 102 | 89  |
| Sb2 | 26278677 | 26278837 | Zm7 | 51394359  | 51394517  | 161 | 159 |
| Sb2 | 45161204 | 45161277 | Zm2 | 151050091 | 151050143 | 74  | 53  |
| Sb2 | 37376747 | 37377257 | Zm7 | 151621646 | 151622147 | 511 | 502 |
| Sb2 | 41910391 | 41910423 | Zm2 | 29067915  | 29067947  | 33  | 33  |
| Sb2 | 44768793 | 44768959 | Zm3 | 200321909 | 200322074 | 167 | 166 |
| Sb2 | 28683371 | 28683512 | Zm2 | 160123180 | 160123319 | 142 | 140 |
| Sb2 | 45777925 | 45778037 | Zm4 | 65207713  | 65207826  | 113 | 114 |
| Sb2 | 45430756 | 45430898 | Zm7 | 60386099  | 60386234  | 143 | 136 |
| Sb2 | 45003134 | 45003253 | Zm7 | 63354218  | 63354282  | 120 | 65  |
| Sb2 | 45390342 | 45390461 | Zm2 | 151045349 | 151045468 | 120 | 120 |
| Sb2 | 27524509 | 27524558 | Zm7 | 52129259  | 52129308  | 50  | 50  |
| Sb2 | 45451445 | 45451707 | Zm2 | 153392773 | 153393036 | 263 | 264 |
| Sb2 | 45390606 | 45390876 | Zm2 | 151045144 | 151045316 | 271 | 173 |
| Sb2 | 31166166 | 31166616 | Zm7 | 65366045  | 65366494  | 451 | 450 |
| Sb2 | 31159486 | 31159706 | Zm7 | 65359071  | 65359289  | 221 | 219 |
| Sb2 | 38878979 | 38879229 | Zm7 | 61304101  | 61304359  | 251 | 259 |
| Sb2 | 26972627 | 26972700 | Zm2 | 8226702   | 8226775   | 74  | 74  |
| Sb2 | 29051072 | 29051266 | Zm7 | 49864042  | 49864236  | 195 | 195 |
| Sb2 | 37834894 | 37835209 | Zm2 | 151796331 | 151796643 | 316 | 313 |
| Sb2 | 28678807 | 28678862 | Zm2 | 160130259 | 160130314 | 56  | 56  |
| Sb2 | 27845098 | 27845594 | Zm7 | 64937788  | 64938272  | 497 | 485 |

|     |          |          |     |           |           |      |      |
|-----|----------|----------|-----|-----------|-----------|------|------|
| Sb2 | 45395971 | 45396463 | Zm2 | 150980440 | 150980933 | 493  | 494  |
| Sb2 | 26309710 | 26310118 | Zm7 | 51423341  | 51423746  | 409  | 406  |
| Sb2 | 45053787 | 45053889 | Zm1 | 44134699  | 44134801  | 103  | 103  |
| Sb2 | 37843435 | 37843790 | Zm2 | 151799914 | 151800272 | 356  | 359  |
| Sb2 | 45946996 | 45947044 | Zm2 | 168866888 | 168866936 | 49   | 49   |
| Sb2 | 38863163 | 38863286 | Zm7 | 61327601  | 61327724  | 124  | 124  |
| Sb2 | 37104819 | 37104950 | Zm1 | 202779873 | 202779988 | 132  | 116  |
| Sb2 | 26331136 | 26331325 | Zm1 | 38252201  | 38252390  | 190  | 190  |
| Sb2 | 45975013 | 45975091 | Zm2 | 168941281 | 168941359 | 79   | 79   |
| Sb2 | 42665485 | 42665565 | Zm7 | 91565412  | 91565488  | 81   | 77   |
| Sb2 | 37111312 | 37111701 | Zm2 | 152279931 | 152280333 | 390  | 403  |
| Sb2 | 38845784 | 38845970 | Zm7 | 61347974  | 61348158  | 187  | 185  |
| Sb2 | 37105863 | 37108664 | Zm2 | 152282197 | 152285008 | 2802 | 2812 |
| Sb2 | 38878086 | 38878465 | Zm7 | 61312875  | 61313252  | 380  | 378  |
| Sb2 | 31138530 | 31138677 | Zm7 | 65329875  | 65330021  | 148  | 147  |
| Sb2 | 45449635 | 45449895 | Zm2 | 153395730 | 153395990 | 261  | 261  |
| Sb2 | 33059762 | 33060279 | Zm8 | 96147347  | 96147864  | 518  | 518  |
| Sb2 | 25313199 | 25313724 | Zm2 | 158611670 | 158612197 | 526  | 528  |
| Sb2 | 27586969 | 27587075 | Zm2 | 160596893 | 160596998 | 107  | 106  |
| Sb2 | 28685765 | 28685819 | Zm2 | 160115049 | 160115103 | 55   | 55   |
| Sb2 | 37823552 | 37823732 | Zm2 | 151794932 | 151795106 | 181  | 175  |
| Sb2 | 25325757 | 25325948 | Zm2 | 158590706 | 158590904 | 192  | 199  |
| Sb2 | 27623297 | 27623582 | Zm7 | 52242838  | 52243125  | 286  | 288  |
| Sb2 | 40077409 | 40077476 | Zm1 | 224635630 | 224635697 | 68   | 68   |
| Sb2 | 37377294 | 37377581 | Zm7 | 151620972 | 151621263 | 288  | 292  |
| Sb2 | 29902446 | 29902761 | Zm7 | 62134289  | 62134603  | 316  | 315  |

|     |          |          |     |           |           |      |      |
|-----|----------|----------|-----|-----------|-----------|------|------|
| Sb2 | 25327333 | 25327549 | Zm2 | 158590488 | 158590696 | 217  | 209  |
| Sb2 | 31092196 | 31092293 | Zm4 | 126214904 | 126215001 | 98   | 98   |
| Sb2 | 45393334 | 45394658 | Zm2 | 150982034 | 150983324 | 1325 | 1291 |
| Sb2 | 27589455 | 27590474 | Zm2 | 160598494 | 160599509 | 1020 | 1016 |
| Sb2 | 28678952 | 28679125 | Zm2 | 160127118 | 160127286 | 174  | 169  |
| Sb2 | 31139046 | 31139516 | Zm7 | 65331550  | 65332023  | 471  | 474  |
| Sb2 | 37108679 | 37108797 | Zm2 | 152282038 | 152282155 | 119  | 118  |
| Sb2 | 43358327 | 43358436 | Zm1 | 22672116  | 22672226  | 110  | 111  |
| Sb2 | 29046240 | 29046404 | Zm7 | 49865155  | 49865319  | 165  | 165  |
| Sb2 | 45947752 | 45947984 | Zm2 | 168867287 | 168867494 | 233  | 208  |
| Sb2 | 45891197 | 45891461 | Zm2 | 153166120 | 153166378 | 265  | 259  |
| Sb2 | 39957720 | 39957891 | Zm7 | 64202739  | 64202910  | 172  | 172  |
| Sb2 | 45423452 | 45423495 | Zm7 | 60449771  | 60449814  | 44   | 44   |
| Sb2 | 45425215 | 45425894 | Zm7 | 60447866  | 60448550  | 680  | 685  |
| Sb2 | 27849215 | 27849443 | Zm7 | 64941311  | 64941547  | 229  | 237  |
| Sb2 | 45993553 | 45993633 | Zm2 | 168956832 | 168956914 | 81   | 83   |
| Sb2 | 27586756 | 27586869 | Zm2 | 160596581 | 160596694 | 114  | 114  |
| Sb2 | 31138369 | 31138519 | Zm7 | 65329672  | 65329822  | 151  | 151  |
| Sb2 | 45003007 | 45003072 | Zm7 | 63354085  | 63354150  | 66   | 66   |
| Sb2 | 40528290 | 40528577 | Zm7 | 63951783  | 63952056  | 288  | 274  |
| Sb2 | 45979432 | 45979516 | Zm2 | 168945094 | 168945177 | 85   | 84   |
| Sb2 | 45890174 | 45890893 | Zm2 | 153164804 | 153165383 | 720  | 580  |
| Sb2 | 25870442 | 25870519 | Zm7 | 50766064  | 50766138  | 78   | 75   |
| Sb2 | 31145864 | 31146001 | Zm7 | 65340616  | 65340753  | 138  | 138  |
| Sb2 | 27422549 | 27422609 | Zm2 | 160570281 | 160570344 | 61   | 64   |
| Sb2 | 27584406 | 27584952 | Zm2 | 160591812 | 160592360 | 547  | 549  |

|     |          |          |      |           |           |      |      |
|-----|----------|----------|------|-----------|-----------|------|------|
| Sb2 | 31159143 | 31159481 | Zm7  | 65358691  | 65359027  | 339  | 337  |
| Sb2 | 24004889 | 24005236 | Zm2  | 160150924 | 160151274 | 348  | 351  |
| Sb2 | 45002714 | 45002878 | Zm7  | 63353794  | 63353937  | 165  | 144  |
| Sb2 | 38849164 | 38849940 | Zm7  | 61343847  | 61344624  | 777  | 778  |
| Sb2 | 27813290 | 27813916 | Zm7  | 49726319  | 49726937  | 627  | 619  |
| Sb2 | 40405950 | 40406021 | Zm1  | 43227643  | 43227714  | 72   | 72   |
| Sb2 | 37347566 | 37347658 | Zm1  | 164500124 | 164500217 | 93   | 94   |
| Sb2 | 42588215 | 42588928 | Zm2  | 158770968 | 158771686 | 714  | 719  |
| Sb2 | 27587488 | 27587656 | Zm2  | 160597333 | 160597496 | 169  | 164  |
| Sb2 | 29902920 | 29903038 | Zm7  | 62134047  | 62134165  | 119  | 119  |
| Sb2 | 37829111 | 37829598 | Zm2  | 151795834 | 151796340 | 488  | 507  |
| Sb2 | 45975200 | 45975311 | Zm2  | 168941459 | 168941576 | 112  | 118  |
| Sb2 | 37820602 | 37820824 | Zm2  | 151792016 | 151792244 | 223  | 229  |
| Sb2 | 28685066 | 28685268 | Zm2  | 160120759 | 160120961 | 203  | 203  |
| Sb2 | 39483387 | 39483884 | Zm7  | 61313469  | 61313954  | 498  | 486  |
| Sb2 | 28682466 | 28682718 | Zm2  | 160124805 | 160125048 | 253  | 244  |
| Sb2 | 27814210 | 27814376 | Zm7  | 49726043  | 49726209  | 167  | 167  |
| Sb2 | 40978540 | 40978592 | Zm2  | 29026414  | 29026466  | 53   | 53   |
| Sb2 | 45948351 | 45948429 | Zm2  | 168867792 | 168867870 | 79   | 79   |
| Sb2 | 27163031 | 27163348 | Zm8  | 8512470   | 8512788   | 318  | 319  |
| Sb2 | 31138773 | 31139042 | Zm7  | 65330133  | 65330399  | 270  | 267  |
| Sb2 | 41908314 | 41908408 | Zm10 | 17171686  | 17171759  | 95   | 74   |
| Sb2 | 26520525 | 26520580 | Zm5  | 61375309  | 61375364  | 56   | 56   |
| Sb2 | 45430968 | 45432067 | Zm7  | 60384934  | 60386046  | 1100 | 1113 |
| Sb2 | 39958452 | 39958689 | Zm7  | 64201977  | 64202212  | 238  | 236  |
| Sb2 | 44075621 | 44075749 | Zm2  | 159023541 | 159023669 | 129  | 129  |

|     |          |          |     |           |           |     |     |
|-----|----------|----------|-----|-----------|-----------|-----|-----|
| Sb2 | 33061578 | 33061759 | Zm8 | 96149216  | 96149279  | 182 | 64  |
| Sb2 | 45150789 | 45150864 | Zm7 | 63181934  | 63182009  | 76  | 76  |
| Sb2 | 44074623 | 44074718 | Zm2 | 159026010 | 159026106 | 96  | 97  |
| Sb2 | 40406294 | 40406458 | Zm5 | 11352746  | 11352910  | 165 | 165 |
| Sb2 | 27588442 | 27588571 | Zm2 | 160598339 | 160598468 | 130 | 130 |
| Sb2 | 26310452 | 26310539 | Zm7 | 51423037  | 51423120  | 88  | 84  |
| Sb2 | 26309022 | 26309212 | Zm7 | 51424570  | 51424760  | 191 | 191 |
| Sb2 | 27812633 | 27812924 | Zm7 | 49727308  | 49727599  | 292 | 292 |
| Sb2 | 38849994 | 38850263 | Zm7 | 61343483  | 61343757  | 270 | 275 |
| Sb2 | 37822917 | 37823495 | Zm2 | 151794250 | 151794837 | 579 | 588 |
| Sb2 | 27585752 | 27585841 | Zm2 | 160592917 | 160593006 | 90  | 90  |
| Sb2 | 26277648 | 26278194 | Zm7 | 51393304  | 51393846  | 547 | 543 |
| Sb2 | 27034871 | 27034953 | Zm5 | 182181877 | 182181944 | 83  | 68  |
| Sb2 | 27226131 | 27226184 | Zm7 | 51900575  | 51900628  | 54  | 54  |
| Sb2 | 25317451 | 25317669 | Zm2 | 158596953 | 158597171 | 219 | 219 |
| Sb2 | 45441860 | 45442403 | Zm7 | 66013620  | 66014163  | 544 | 544 |
| Sb2 | 40265483 | 40265530 | Zm2 | 47927974  | 47928018  | 48  | 45  |
| Sb2 | 45448500 | 45449096 | Zm2 | 153396668 | 153397216 | 597 | 549 |
| Sb2 | 28681277 | 28681599 | Zm2 | 160125951 | 160126274 | 323 | 324 |
| Sb2 | 45423777 | 45423905 | Zm7 | 60449407  | 60449535  | 129 | 129 |
| Sb2 | 45451845 | 45452208 | Zm2 | 153392143 | 153392507 | 364 | 365 |
| Sb2 | 27477084 | 27477178 | Zm1 | 158233225 | 158233319 | 95  | 95  |
| Sb2 | 26990536 | 26990692 | Zm3 | 164332806 | 164332962 | 157 | 157 |
| Sb2 | 45392420 | 45393156 | Zm2 | 150983460 | 150984184 | 737 | 725 |
| Sb2 | 25305178 | 25305335 | Zm2 | 158619002 | 158619159 | 158 | 158 |
| Sb2 | 30036364 | 30036474 | Zm7 | 116187847 | 116187957 | 111 | 111 |

|     |          |          |     |           |           |      |      |
|-----|----------|----------|-----|-----------|-----------|------|------|
| Sb2 | 45442568 | 45442907 | Zm7 | 66014559  | 66014888  | 340  | 330  |
| Sb2 | 45952442 | 45952723 | Zm2 | 168870681 | 168870957 | 282  | 277  |
| Sb2 | 39959061 | 39959234 | Zm7 | 64201516  | 64201685  | 174  | 170  |
| Sb2 | 45449218 | 45449599 | Zm2 | 153396047 | 153396427 | 382  | 381  |
| Sb2 | 26862490 | 26862746 | Zm9 | 106595746 | 106595965 | 257  | 220  |
| Sb2 | 45427103 | 45427198 | Zm7 | 60446674  | 60446767  | 96   | 94   |
| Sb2 | 25306221 | 25306805 | Zm2 | 158613901 | 158614488 | 585  | 588  |
| Sb2 | 27587672 | 27587987 | Zm2 | 160597532 | 160597846 | 316  | 315  |
| Sb2 | 31148471 | 31149297 | Zm7 | 65342149  | 65342976  | 827  | 828  |
| Sb2 | 29241780 | 29241871 | Zm7 | 49809616  | 49809707  | 92   | 92   |
| Sb2 | 37822419 | 37822754 | Zm2 | 151793789 | 151794119 | 336  | 331  |
| Sb2 | 45161283 | 45161377 | Zm2 | 151049799 | 151049893 | 95   | 95   |
| Sb2 | 42574259 | 42574310 | Zm2 | 124950458 | 124950509 | 52   | 52   |
| Sb2 | 45425018 | 45425122 | Zm7 | 60448649  | 60448754  | 105  | 106  |
| Sb2 | 45449103 | 45449192 | Zm2 | 153396484 | 153396573 | 90   | 90   |
| Sb2 | 26299331 | 26299485 | Zm7 | 51444441  | 51444595  | 155  | 155  |
| Sb2 | 25325604 | 25325727 | Zm2 | 158590948 | 158591071 | 124  | 124  |
| Sb2 | 27225398 | 27225461 | Zm7 | 51899595  | 51899662  | 64   | 68   |
| Sb2 | 40088460 | 40088534 | Zm5 | 21463060  | 21463134  | 75   | 75   |
| Sb2 | 44074837 | 44074930 | Zm2 | 159024063 | 159024159 | 94   | 97   |
| Sb2 | 40528602 | 40529893 | Zm7 | 63950482  | 63951779  | 1292 | 1298 |
| Sb2 | 28687256 | 28688710 | Zm2 | 160112481 | 160113987 | 1455 | 1507 |
| Sb2 | 45447492 | 45447650 | Zm2 | 153407277 | 153407435 | 159  | 159  |
| Sb2 | 45889695 | 45889793 | Zm2 | 153163934 | 153164032 | 99   | 99   |
| Sb2 | 31137811 | 31138078 | Zm7 | 65329102  | 65329368  | 268  | 267  |
| Sb2 | 29966187 | 29966374 | Zm5 | 18473745  | 18473871  | 188  | 127  |

|     |          |          |     |           |           |      |      |
|-----|----------|----------|-----|-----------|-----------|------|------|
| Sb2 | 38848660 | 38848924 | Zm7 | 61344672  | 61344941  | 265  | 270  |
| Sb2 | 26310225 | 26310349 | Zm7 | 51423211  | 51423333  | 125  | 123  |
| Sb2 | 45423950 | 45424023 | Zm7 | 60449303  | 60449376  | 74   | 74   |
| Sb2 | 31166866 | 31167449 | Zm7 | 65366870  | 65367459  | 584  | 590  |
| Sb2 | 45151915 | 45151977 | Zm7 | 63183466  | 63183528  | 63   | 63   |
| Sb2 | 45985366 | 45985793 | Zm2 | 168950894 | 168951325 | 428  | 432  |
| Sb2 | 25345747 | 25346204 | Zm2 | 158585212 | 158585672 | 458  | 461  |
| Sb2 | 44079764 | 44079854 | Zm2 | 159017671 | 159017762 | 91   | 92   |
| Sb2 | 25317175 | 25317429 | Zm2 | 158597225 | 158597476 | 255  | 252  |
| Sb2 | 27159606 | 27159714 | Zm1 | 3216951   | 3217060   | 109  | 110  |
| Sb2 | 44072499 | 44072613 | Zm2 | 159028932 | 159029049 | 115  | 118  |
| Sb2 | 45979623 | 45982591 | Zm2 | 168945302 | 168948219 | 2969 | 2918 |
| Sb2 | 38862350 | 38863065 | Zm7 | 61328053  | 61328770  | 716  | 718  |
| Sb2 | 27582879 | 27582917 | Zm7 | 52151626  | 52151664  | 39   | 39   |
| Sb2 | 41910528 | 41911004 | Zm2 | 29067339  | 29067816  | 477  | 478  |
| Sb2 | 25869251 | 25869303 | Zm7 | 50767657  | 50767708  | 53   | 52   |
| Sb2 | 44079856 | 44080079 | Zm2 | 159017331 | 159017563 | 224  | 233  |
| Sb2 | 38846010 | 38848441 | Zm7 | 61345483  | 61347928  | 2432 | 2446 |
| Sb2 | 40356557 | 40356680 | Zm1 | 215885300 | 215885422 | 124  | 123  |
| Sb2 | 31144951 | 31145570 | Zm7 | 65338298  | 65338908  | 620  | 611  |
| Sb2 | 27638192 | 27638730 | Zm7 | 52247357  | 52247840  | 539  | 484  |
| Sb2 | 29922862 | 29922939 | Zm2 | 99644853  | 99644930  | 78   | 78   |
| Sb2 | 45427413 | 45427688 | Zm7 | 60446172  | 60446447  | 276  | 276  |
| Sb2 | 45148595 | 45148859 | Zm2 | 151056754 | 151057001 | 265  | 248  |
| Sb2 | 26292272 | 26292429 | Zm7 | 51446064  | 51446221  | 158  | 158  |
| Sb2 | 27586305 | 27586471 | Zm2 | 160593120 | 160593281 | 167  | 162  |



|     |          |          |      |           |           |      |      |
|-----|----------|----------|------|-----------|-----------|------|------|
| Sb2 | 39964734 | 39964879 | Zm7  | 64199954  | 64200094  | 146  | 141  |
| Sb2 | 27848944 | 27849193 | Zm7  | 64941043  | 64941279  | 250  | 237  |
| Sb2 | 27137106 | 27137222 | Zm4  | 60770582  | 60770698  | 117  | 117  |
| Sb2 | 45443125 | 45443521 | Zm7  | 66015055  | 66015445  | 397  | 391  |
| Sb2 | 25869375 | 25869447 | Zm10 | 85635448  | 85635490  | 73   | 43   |
| Sb2 | 41425241 | 41425334 | Zm2  | 190813252 | 190813345 | 94   | 94   |
| Sb2 | 37822034 | 37822265 | Zm2  | 151793410 | 151793640 | 232  | 231  |
| Sb2 | 45892855 | 45893673 | Zm2  | 153168023 | 153168857 | 819  | 835  |
| Sb2 | 27637909 | 27638029 | Zm7  | 52247087  | 52247207  | 121  | 121  |
| Sb2 | 27035527 | 27035649 | Zm5  | 182182534 | 182182652 | 123  | 119  |
| Sb2 | 44077803 | 44078551 | Zm2  | 159020462 | 159021205 | 749  | 744  |
| Sb2 | 26292447 | 26292527 | Zm7  | 51445996  | 51446077  | 81   | 82   |
| Sb2 | 45778296 | 45778485 | Zm2  | 153351538 | 153351732 | 190  | 195  |
| Sb2 | 37375830 | 37375917 | Zm2  | 151751378 | 151751466 | 88   | 89   |
| Sb2 | 27637649 | 27637774 | Zm7  | 52246822  | 52246947  | 126  | 126  |
| Sb2 | 37347689 | 37347787 | Zm1  | 164500319 | 164500412 | 99   | 94   |
| Sb2 | 26309294 | 26309388 | Zm7  | 51424383  | 51424477  | 95   | 95   |
| Sb2 | 45893966 | 45894041 | Zm2  | 153169632 | 153169705 | 76   | 74   |
| Sb2 | 45971454 | 45971713 | Zm2  | 168871534 | 168871797 | 260  | 264  |
| Sb2 | 38864086 | 38864244 | Zm7  | 61325689  | 61325847  | 159  | 159  |
| Sb2 | 31145616 | 31145741 | Zm7  | 65339254  | 65339379  | 126  | 126  |
| Sb2 | 25871081 | 25872142 | Zm7  | 50764425  | 50765485  | 1062 | 1061 |
| Sb2 | 45950356 | 45951062 | Zm2  | 168868935 | 168869655 | 707  | 721  |
| Sb2 | 39957440 | 39957581 | Zm7  | 64203019  | 64203163  | 142  | 145  |
| Sb2 | 37088828 | 37089111 | Zm2  | 152295112 | 152295397 | 284  | 286  |
| Sb2 | 27227069 | 27227140 | Zm7  | 51901129  | 51901196  | 72   | 68   |

|     |          |          |     |           |           |      |      |
|-----|----------|----------|-----|-----------|-----------|------|------|
| Sb2 | 45449969 | 45450307 | Zm2 | 153394768 | 153395103 | 339  | 336  |
| Sb2 | 38863739 | 38863844 | Zm7 | 61327399  | 61327504  | 106  | 106  |
| Sb2 | 38852552 | 38852784 | Zm7 | 61342885  | 61343117  | 233  | 233  |
| Sb2 | 38864335 | 38864619 | Zm7 | 61324476  | 61324766  | 285  | 291  |
| Sb2 | 44077673 | 44077801 | Zm2 | 159021323 | 159021454 | 129  | 132  |
| Sb2 | 26102277 | 26102357 | Zm4 | 242028576 | 242028656 | 81   | 81   |
| Sb2 | 45428649 | 45430026 | Zm7 | 60444100  | 60445446  | 1378 | 1347 |
| Sb2 | 45161438 | 45161577 | Zm2 | 151049623 | 151049762 | 140  | 140  |
| Sb2 | 45424808 | 45424910 | Zm7 | 60448827  | 60448932  | 103  | 106  |
| Sb2 | 44078553 | 44078763 | Zm2 | 159020171 | 159020384 | 211  | 214  |
| Sb2 | 37104227 | 37104373 | Zm1 | 141570357 | 141570497 | 147  | 141  |
| Sb2 | 45993280 | 45993486 | Zm2 | 168956234 | 168956438 | 207  | 205  |
| Sb2 | 29052017 | 29052081 | Zm7 | 49863271  | 49863333  | 65   | 63   |
| Sb2 | 27849724 | 27849904 | Zm7 | 64941780  | 64941969  | 181  | 190  |
| Sb2 | 26278272 | 26278476 | Zm7 | 51393871  | 51394075  | 205  | 205  |
| Sb2 | 31167681 | 31168426 | Zm7 | 65367861  | 65368591  | 746  | 731  |
| Sb2 | 37109089 | 37110244 | Zm2 | 152280878 | 152282011 | 1156 | 1134 |
| Sb2 | 39965377 | 39965436 | Zm9 | 133091925 | 133091984 | 60   | 60   |
| Sb2 | 38862133 | 38862249 | Zm7 | 61328665  | 61328781  | 117  | 117  |
| Sb2 | 45450872 | 45451175 | Zm2 | 153393042 | 153393341 | 304  | 300  |
| Sb2 | 37111778 | 37113915 | Zm2 | 152277738 | 152279872 | 2138 | 2135 |
| Sb2 | 45427792 | 45427962 | Zm7 | 60445896  | 60446066  | 171  | 171  |
| Sb2 | 37121187 | 37121524 | Zm2 | 152267183 | 152267528 | 338  | 346  |
| Sb2 | 45892618 | 45892717 | Zm2 | 153167809 | 153167859 | 100  | 51   |
| Sb2 | 37122363 | 37122733 | Zm2 | 152266411 | 152266763 | 371  | 353  |
| Sb2 | 45315749 | 45315878 | Zm9 | 73483480  | 73483609  | 130  | 130  |

|     |          |          |      |           |           |      |      |
|-----|----------|----------|------|-----------|-----------|------|------|
| Sb2 | 27623604 | 27624416 | Zm7  | 52243325  | 52244131  | 813  | 807  |
| Sb2 | 26292140 | 26292244 | Zm7  | 51400622  | 51400719  | 105  | 98   |
| Sb2 | 25869150 | 25869248 | Zm7  | 50767754  | 50767835  | 99   | 82   |
| Sb2 | 38853396 | 38853492 | Zm7  | 61342092  | 61342188  | 97   | 97   |
| Sb2 | 45450407 | 45450537 | Zm2  | 153393887 | 153394015 | 131  | 129  |
| Sb2 | 40530298 | 40530731 | Zm7  | 63949589  | 63950036  | 434  | 448  |
| Sb2 | 42667645 | 42667704 | Zm2  | 159615430 | 159615489 | 60   | 60   |
| Sb2 | 28683823 | 28684807 | Zm2  | 160121538 | 160122519 | 985  | 982  |
| Sb2 | 44076719 | 44077641 | Zm2  | 159021666 | 159022573 | 923  | 908  |
| Sb2 | 45986105 | 45986155 | Zm2  | 168951719 | 168951769 | 51   | 51   |
| Sb2 | 41446189 | 41446340 | Zm3  | 178234273 | 178234426 | 152  | 154  |
| Sb2 | 45994346 | 45995456 | Zm2  | 168956920 | 168957994 | 1111 | 1075 |
| Sb2 | 41908088 | 41908213 | Zm10 | 17171864  | 17171988  | 126  | 125  |
| Sb2 | 38852874 | 38853327 | Zm7  | 61342385  | 61342838  | 454  | 454  |
| Sb2 | 26990737 | 26990820 | Zm3  | 9607273   | 9607356   | 84   | 84   |
| Sb2 | 39171017 | 39171059 | Zm5  | 209144449 | 209144485 | 43   | 37   |
| Sb2 | 45383489 | 45383637 | Zm2  | 150988632 | 150988779 | 149  | 148  |
| Sb2 | 27623089 | 27623207 | Zm7  | 52242632  | 52242757  | 119  | 126  |
| Sb2 | 31146070 | 31146699 | Zm7  | 65340777  | 65341383  | 630  | 607  |
| Sb2 | 41387871 | 41387917 | Zm5  | 15056750  | 15056796  | 47   | 47   |
| Sb2 | 38860557 | 38862093 | Zm7  | 61331104  | 61332648  | 1537 | 1545 |
| Sb2 | 27849504 | 27849672 | Zm7  | 64941599  | 64941756  | 169  | 158  |
| Sb2 | 28683518 | 28683821 | Zm2  | 160122553 | 160122857 | 304  | 305  |
| Sb2 | 42667218 | 42667374 | Zm2  | 159615605 | 159615760 | 157  | 156  |
| Sb2 | 37841220 | 37841335 | Zm2  | 151798951 | 151799068 | 116  | 118  |
| Sb2 | 45989917 | 45990386 | Zm2  | 168951944 | 168952410 | 470  | 467  |

|     |          |          |      |           |           |      |      |
|-----|----------|----------|------|-----------|-----------|------|------|
| Sb2 | 28684846 | 28684926 | Zm2  | 160121127 | 160121207 | 81   | 81   |
| Sb2 | 37119046 | 37120664 | Zm2  | 152271024 | 152272643 | 1619 | 1620 |
| Sb2 | 44088316 | 44088389 | Zm2  | 159015335 | 159015407 | 74   | 73   |
| Sb2 | 40527250 | 40527422 | Zm7  | 63952882  | 63953054  | 173  | 173  |
| Sb2 | 45151005 | 45151078 | Zm2  | 151055264 | 151055332 | 74   | 69   |
| Sb2 | 28685848 | 28686364 | Zm2  | 160114443 | 160114951 | 517  | 509  |
| Sb2 | 37098036 | 37098153 | Zm2  | 152292069 | 152292181 | 118  | 113  |
| Sb2 | 37834319 | 37834398 | Zm7  | 7945810   | 7945889   | 80   | 80   |
| Sb2 | 38877457 | 38877972 | Zm7  | 61313469  | 61313971  | 516  | 503  |
| Sb2 | 32091311 | 32091389 | Zm1  | 260044642 | 260044721 | 79   | 80   |
| Sb2 | 44085921 | 44086523 | Zm2  | 159015571 | 159016165 | 603  | 595  |
| Sb2 | 27848025 | 27848353 | Zm7  | 64940628  | 64940950  | 329  | 323  |
| Sb2 | 37122157 | 37122240 | Zm2  | 152266865 | 152266948 | 84   | 84   |
| Sb2 | 41906223 | 41906277 | Zm10 | 128031580 | 128031634 | 55   | 55   |
| Sb2 | 45450541 | 45450803 | Zm2  | 153393596 | 153393857 | 263  | 262  |
| Sb2 | 41907398 | 41907458 | Zm2  | 29066216  | 29066276  | 61   | 61   |
| Sb2 | 26862278 | 26862322 | Zm9  | 106596165 | 106596208 | 45   | 44   |
| Sb2 | 28681707 | 28682450 | Zm2  | 160125130 | 160125856 | 744  | 727  |
| Sb2 | 33060782 | 33060968 | Zm8  | 96148337  | 96148452  | 187  | 116  |
| Sb2 | 45432332 | 45432653 | Zm7  | 60384355  | 60384682  | 322  | 328  |
| Sb2 | 37384022 | 37384127 | Zm2  | 151756845 | 151756949 | 106  | 105  |
| Sb2 | 28685276 | 28685426 | Zm2  | 160115311 | 160115461 | 151  | 151  |
| Sb2 | 29051659 | 29051832 | Zm7  | 49863511  | 49863687  | 174  | 177  |
| Sb2 | 45442451 | 45442557 | Zm7  | 66014297  | 66014396  | 107  | 100  |
| Sb2 | 45391863 | 45391912 | Zm2  | 150987473 | 150987522 | 50   | 50   |
| Sb2 | 27225264 | 27225322 | Zm7  | 51899447  | 51899507  | 59   | 61   |

|     |          |          |     |           |           |      |     |
|-----|----------|----------|-----|-----------|-----------|------|-----|
| Sb2 | 37097075 | 37097129 | Zm3 | 156253631 | 156253685 | 55   | 55  |
| Sb2 | 45991019 | 45991177 | Zm2 | 168952512 | 168952663 | 159  | 152 |
| Sb2 | 29965895 | 29966045 | Zm5 | 18474115  | 18474226  | 151  | 112 |
| Sb2 | 45001770 | 45002008 | Zm7 | 63352843  | 63353086  | 239  | 244 |
| Sb2 | 31143830 | 31144830 | Zm7 | 65337197  | 65338187  | 1001 | 991 |
| Sb2 | 27851589 | 27851650 | Zm7 | 64943287  | 64943347  | 62   | 61  |
| Sb3 | 38369404 | 38369458 | Zm1 | 247388    | 247442    | 55   | 55  |
| Sb3 | 38363978 | 38364032 | Zm1 | 247388    | 247442    | 55   | 55  |
| Sb3 | 30552463 | 30552732 | Zm1 | 3996436   | 3996705   | 270  | 270 |
| Sb3 | 30552893 | 30553159 | Zm1 | 3996909   | 3997178   | 267  | 270 |
| Sb3 | 30553232 | 30553290 | Zm1 | 3997219   | 3997278   | 59   | 60  |
| Sb3 | 30558927 | 30559033 | Zm1 | 4003352   | 4003460   | 107  | 109 |
| Sb3 | 30559093 | 30559581 | Zm1 | 4003488   | 4003972   | 489  | 485 |
| Sb3 | 25794273 | 25794361 | Zm1 | 6185987   | 6186075   | 89   | 89  |
| Sb3 | 27773445 | 27773628 | Zm1 | 10716999  | 10717182  | 184  | 184 |
| Sb3 | 26928989 | 26929218 | Zm1 | 37278771  | 37278991  | 230  | 221 |
| Sb3 | 26929224 | 26929409 | Zm1 | 37279430  | 37279599  | 186  | 170 |
| Sb3 | 26288147 | 26288233 | Zm1 | 208537621 | 208537707 | 87   | 87  |
| Sb3 | 43829598 | 43829701 | Zm1 | 221550349 | 221550447 | 104  | 99  |
| Sb3 | 43798333 | 43798436 | Zm1 | 221550349 | 221550447 | 104  | 99  |
| Sb3 | 43828943 | 43829070 | Zm1 | 221550487 | 221550613 | 128  | 127 |
| Sb3 | 43797678 | 43797805 | Zm1 | 221550487 | 221550613 | 128  | 127 |
| Sb3 | 38337397 | 38337653 | Zm1 | 222020093 | 222020341 | 257  | 249 |
| Sb3 | 38729240 | 38729319 | Zm1 | 225663599 | 225663678 | 80   | 80  |
| Sb3 | 38729146 | 38729226 | Zm1 | 225663732 | 225663814 | 81   | 83  |
| Sb3 | 43324148 | 43324205 | Zm1 | 231752109 | 231752166 | 58   | 58  |

|     |          |          |      |           |           |     |     |
|-----|----------|----------|------|-----------|-----------|-----|-----|
| Sb3 | 36134972 | 36135086 | Zm1  | 237920139 | 237920253 | 115 | 115 |
| Sb3 | 36134355 | 36134569 | Zm1  | 237920553 | 237920765 | 215 | 213 |
| Sb3 | 33317218 | 33317270 | Zm1  | 252213638 | 252213690 | 53  | 53  |
| Sb3 | 30886667 | 30887351 | Zm1  | 270975642 | 270976323 | 685 | 682 |
| Sb3 | 43001366 | 43001414 | Zm1  | 291616681 | 291616729 | 49  | 49  |
| Sb3 | 43001245 | 43001361 | Zm1  | 291617384 | 291617499 | 117 | 116 |
| Sb3 | 43001056 | 43001219 | Zm1  | 291617501 | 291617664 | 164 | 164 |
| Sb3 | 42906018 | 42906190 | Zm1  | 291617728 | 291617900 | 173 | 173 |
| Sb3 | 38435828 | 38436027 | Zm10 | 103024166 | 103024351 | 200 | 186 |
| Sb3 | 28940029 | 28940104 | Zm10 | 104680343 | 104680418 | 76  | 76  |
| Sb3 | 40116640 | 40116874 | Zm10 | 124773724 | 124773955 | 235 | 232 |
| Sb3 | 40116920 | 40117127 | Zm10 | 124774013 | 124774220 | 208 | 208 |
| Sb3 | 27967297 | 27967383 | Zm10 | 148018105 | 148018191 | 87  | 87  |
| Sb3 | 43185693 | 43185748 | Zm2  | 2353543   | 2353598   | 56  | 56  |
| Sb3 | 42882302 | 42882526 | Zm2  | 9881020   | 9881244   | 225 | 225 |
| Sb3 | 28366030 | 28366128 | Zm2  | 36437317  | 36437416  | 99  | 100 |
| Sb3 | 42445775 | 42446406 | Zm2  | 40967919  | 40968558  | 632 | 640 |
| Sb3 | 38739276 | 38739336 | Zm2  | 147638054 | 147638113 | 61  | 60  |
| Sb3 | 43783894 | 43783947 | Zm2  | 167983895 | 167983943 | 54  | 49  |
| Sb3 | 41901738 | 41901840 | Zm2  | 190812841 | 190812943 | 103 | 103 |
| Sb3 | 41901573 | 41901649 | Zm2  | 190813376 | 190813452 | 77  | 77  |
| Sb3 | 27644550 | 27644598 | Zm2  | 194325660 | 194325708 | 49  | 49  |
| Sb3 | 38662414 | 38662469 | Zm2  | 195752898 | 195752953 | 56  | 56  |
| Sb3 | 38438162 | 38438378 | Zm2  | 201547976 | 201548195 | 217 | 220 |
| Sb3 | 27178920 | 27179258 | Zm3  | 8613616   | 8613962   | 339 | 347 |
| Sb3 | 42155938 | 42156269 | Zm3  | 8613640   | 8613971   | 332 | 332 |

|     |          |          |     |          |          |      |      |
|-----|----------|----------|-----|----------|----------|------|------|
| Sb3 | 43190311 | 43190447 | Zm3 | 19790806 | 19790942 | 137  | 137  |
| Sb3 | 38664697 | 38664765 | Zm3 | 37335806 | 37335838 | 69   | 33   |
| Sb3 | 38664847 | 38664927 | Zm3 | 37335989 | 37336031 | 81   | 43   |
| Sb3 | 27299030 | 27299222 | Zm3 | 68786893 | 68787083 | 193  | 191  |
| Sb3 | 27298290 | 27298387 | Zm3 | 68788322 | 68788416 | 98   | 95   |
| Sb3 | 27297160 | 27297222 | Zm3 | 68789082 | 68789144 | 63   | 63   |
| Sb3 | 27295736 | 27296500 | Zm3 | 68789766 | 68790551 | 765  | 786  |
| Sb3 | 27295352 | 27295478 | Zm3 | 68790822 | 68790948 | 127  | 127  |
| Sb3 | 37408169 | 37408839 | Zm3 | 69865647 | 69866333 | 671  | 687  |
| Sb3 | 37409442 | 37409623 | Zm3 | 69870719 | 69870898 | 182  | 180  |
| Sb3 | 37411324 | 37411388 | Zm3 | 69889345 | 69889409 | 65   | 65   |
| Sb3 | 37411406 | 37412279 | Zm3 | 69889446 | 69890318 | 874  | 873  |
| Sb3 | 37412340 | 37412521 | Zm3 | 69890352 | 69890533 | 182  | 182  |
| Sb3 | 37413664 | 37414883 | Zm3 | 69891593 | 69892799 | 1220 | 1207 |
| Sb3 | 37406857 | 37407039 | Zm3 | 69935030 | 69935210 | 183  | 181  |
| Sb3 | 37407094 | 37407182 | Zm3 | 69935302 | 69935387 | 89   | 86   |
| Sb3 | 37407425 | 37407555 | Zm3 | 69935591 | 69935729 | 131  | 139  |
| Sb3 | 37407796 | 37408060 | Zm3 | 69935815 | 69936078 | 265  | 264  |
| Sb3 | 29394818 | 29395307 | Zm3 | 70476561 | 70477054 | 490  | 494  |
| Sb3 | 29397854 | 29398108 | Zm3 | 70477206 | 70477453 | 255  | 248  |
| Sb3 | 29398185 | 29398406 | Zm3 | 70477480 | 70477688 | 222  | 209  |
| Sb3 | 29399391 | 29399518 | Zm3 | 70477821 | 70477939 | 128  | 119  |
| Sb3 | 29400852 | 29400986 | Zm3 | 70485256 | 70485394 | 135  | 139  |
| Sb3 | 29401018 | 29402186 | Zm3 | 70485396 | 70486544 | 1169 | 1149 |
| Sb3 | 29402406 | 29402962 | Zm3 | 70488429 | 70489005 | 557  | 577  |
| Sb3 | 29404768 | 29404904 | Zm3 | 70489136 | 70489272 | 137  | 137  |

|     |          |          |     |          |          |      |      |
|-----|----------|----------|-----|----------|----------|------|------|
| Sb3 | 29408248 | 29408294 | Zm3 | 70490500 | 70490546 | 47   | 47   |
| Sb3 | 29408297 | 29408770 | Zm3 | 70491127 | 70491599 | 474  | 473  |
| Sb3 | 29408997 | 29409235 | Zm3 | 70491684 | 70491919 | 239  | 236  |
| Sb3 | 29410397 | 29410586 | Zm3 | 70492038 | 70492223 | 190  | 186  |
| Sb3 | 29410597 | 29411984 | Zm3 | 70492383 | 70493736 | 1388 | 1354 |
| Sb3 | 29425152 | 29425450 | Zm3 | 70534025 | 70534322 | 299  | 298  |
| Sb3 | 29425482 | 29425924 | Zm3 | 70534348 | 70534775 | 443  | 428  |
| Sb3 | 29431863 | 29431979 | Zm3 | 70535538 | 70535654 | 117  | 117  |
| Sb3 | 29432071 | 29432189 | Zm3 | 70536425 | 70536543 | 119  | 119  |
| Sb3 | 29432255 | 29432362 | Zm3 | 70536591 | 70536697 | 108  | 107  |
| Sb3 | 29432423 | 29432585 | Zm3 | 70536732 | 70536892 | 163  | 161  |
| Sb3 | 31621304 | 31621466 | Zm3 | 72024173 | 72024337 | 163  | 165  |
| Sb3 | 31620196 | 31620366 | Zm3 | 72030795 | 72030963 | 171  | 169  |
| Sb3 | 31619528 | 31619772 | Zm3 | 72031172 | 72031415 | 245  | 244  |
| Sb3 | 31618946 | 31619509 | Zm3 | 72031770 | 72032317 | 564  | 548  |
| Sb3 | 31618200 | 31618866 | Zm3 | 72032391 | 72033068 | 667  | 678  |
| Sb3 | 31617604 | 31618063 | Zm3 | 72038970 | 72039431 | 460  | 462  |
| Sb3 | 31608066 | 31609830 | Zm3 | 72052204 | 72053968 | 1765 | 1765 |
| Sb3 | 31604766 | 31607502 | Zm3 | 72054069 | 72056816 | 2737 | 2748 |
| Sb3 | 31599041 | 31599163 | Zm3 | 72068824 | 72068947 | 123  | 124  |
| Sb3 | 31598982 | 31599039 | Zm3 | 72068972 | 72069027 | 58   | 56   |
| Sb3 | 31598219 | 31598911 | Zm3 | 72069110 | 72069803 | 693  | 694  |
| Sb3 | 31597767 | 31597862 | Zm3 | 72075852 | 72075944 | 96   | 93   |
| Sb3 | 31591332 | 31592071 | Zm3 | 72081335 | 72082038 | 740  | 704  |
| Sb3 | 31590665 | 31591216 | Zm3 | 72082110 | 72082658 | 552  | 549  |
| Sb3 | 31583739 | 31584507 | Zm3 | 72083557 | 72084334 | 769  | 778  |



|     |          |          |     |          |          |      |      |
|-----|----------|----------|-----|----------|----------|------|------|
| Sb3 | 31572948 | 31573267 | Zm3 | 72093464 | 72093779 | 320  | 316  |
| Sb3 | 31567084 | 31567617 | Zm3 | 72098411 | 72098958 | 534  | 548  |
| Sb3 | 31563197 | 31563975 | Zm3 | 72099200 | 72099958 | 779  | 759  |
| Sb3 | 31562709 | 31562845 | Zm3 | 72100506 | 72100638 | 137  | 133  |
| Sb3 | 31561998 | 31562638 | Zm3 | 72100676 | 72101320 | 641  | 645  |
| Sb3 | 31561806 | 31561968 | Zm3 | 72105879 | 72106038 | 163  | 160  |
| Sb3 | 31561521 | 31561792 | Zm3 | 72106833 | 72107096 | 272  | 264  |
| Sb3 | 31560798 | 31561163 | Zm3 | 72107459 | 72107817 | 366  | 359  |
| Sb3 | 31560458 | 31560555 | Zm3 | 72109747 | 72109844 | 98   | 98   |
| Sb3 | 31560202 | 31560356 | Zm3 | 72109881 | 72110035 | 155  | 155  |
| Sb3 | 31559431 | 31559998 | Zm3 | 72109919 | 72110498 | 568  | 580  |
| Sb3 | 26285954 | 26286253 | Zm3 | 74277257 | 74277558 | 300  | 302  |
| Sb3 | 26279277 | 26279534 | Zm3 | 74283721 | 74283862 | 258  | 142  |
| Sb3 | 26278867 | 26279132 | Zm3 | 74284134 | 74284392 | 266  | 259  |
| Sb3 | 23695609 | 23695705 | Zm3 | 74668001 | 74668100 | 97   | 100  |
| Sb3 | 23694762 | 23695545 | Zm3 | 74668161 | 74668946 | 784  | 786  |
| Sb3 | 23694439 | 23694641 | Zm3 | 74669232 | 74669440 | 203  | 209  |
| Sb3 | 23693890 | 23694295 | Zm3 | 74669444 | 74669850 | 406  | 407  |
| Sb3 | 23693507 | 23693578 | Zm3 | 74670134 | 74670206 | 72   | 73   |
| Sb3 | 23688456 | 23688679 | Zm3 | 74674018 | 74674251 | 224  | 234  |
| Sb3 | 23687363 | 23687428 | Zm3 | 74675059 | 74675124 | 66   | 66   |
| Sb3 | 23687050 | 23687327 | Zm3 | 74675135 | 74675406 | 278  | 272  |
| Sb3 | 23686850 | 23686907 | Zm3 | 74680111 | 74680168 | 58   | 58   |
| Sb3 | 28500165 | 28501643 | Zm3 | 76180270 | 76181774 | 1479 | 1505 |
| Sb3 | 28500114 | 28500159 | Zm3 | 76186425 | 76186470 | 46   | 46   |
| Sb3 | 28499589 | 28499979 | Zm3 | 76186856 | 76187255 | 391  | 400  |

|     |          |          |     |          |          |     |     |
|-----|----------|----------|-----|----------|----------|-----|-----|
| Sb3 | 28498135 | 28498584 | Zm3 | 76189620 | 76190073 | 450 | 454 |
| Sb3 | 28495411 | 28496079 | Zm3 | 76190311 | 76190997 | 669 | 687 |
| Sb3 | 28484749 | 28484894 | Zm3 | 76191312 | 76191462 | 146 | 151 |
| Sb3 | 28484379 | 28484517 | Zm3 | 76191501 | 76191639 | 139 | 139 |
| Sb3 | 28482683 | 28483339 | Zm3 | 76209095 | 76209753 | 657 | 659 |
| Sb3 | 28482395 | 28482649 | Zm3 | 76209757 | 76210011 | 255 | 255 |
| Sb3 | 28482190 | 28482279 | Zm3 | 76210092 | 76210182 | 90  | 91  |
| Sb3 | 27978039 | 27978499 | Zm3 | 79288442 | 79288909 | 461 | 468 |
| Sb3 | 27979184 | 27979313 | Zm3 | 79292163 | 79292293 | 130 | 131 |
| Sb3 | 27979722 | 27979872 | Zm3 | 79292312 | 79292461 | 151 | 150 |
| Sb3 | 27979984 | 27980619 | Zm3 | 79292505 | 79293161 | 636 | 657 |
| Sb3 | 27980702 | 27980843 | Zm3 | 79293204 | 79293344 | 142 | 141 |
| Sb3 | 27984214 | 27984442 | Zm3 | 79294370 | 79294597 | 229 | 228 |
| Sb3 | 27984751 | 27984848 | Zm3 | 79294763 | 79294860 | 98  | 98  |
| Sb3 | 27985506 | 27986198 | Zm3 | 79313156 | 79313847 | 693 | 692 |
| Sb3 | 27987019 | 27987456 | Zm3 | 79313885 | 79314318 | 438 | 434 |
| Sb3 | 27987612 | 27987768 | Zm3 | 79318048 | 79318205 | 157 | 158 |
| Sb3 | 27988044 | 27988226 | Zm3 | 79323474 | 79323655 | 183 | 182 |
| Sb3 | 27988251 | 27988302 | Zm3 | 79323655 | 79323706 | 52  | 52  |
| Sb3 | 27988583 | 27988642 | Zm3 | 79324030 | 79324089 | 60  | 60  |
| Sb3 | 27989388 | 27989914 | Zm3 | 79330976 | 79331515 | 527 | 540 |
| Sb3 | 25917918 | 25918634 | Zm3 | 79691801 | 79692507 | 717 | 707 |
| Sb3 | 25918637 | 25918710 | Zm3 | 79693344 | 79693417 | 74  | 74  |
| Sb3 | 25919295 | 25919857 | Zm3 | 79694048 | 79694616 | 563 | 569 |
| Sb3 | 25919939 | 25920117 | Zm3 | 79694714 | 79694873 | 179 | 160 |
| Sb3 | 25920250 | 25920826 | Zm3 | 79721322 | 79721883 | 577 | 562 |

|     |          |          |     |          |          |      |      |
|-----|----------|----------|-----|----------|----------|------|------|
| Sb3 | 25921052 | 25921302 | Zm3 | 79721959 | 79722211 | 251  | 253  |
| Sb3 | 25921329 | 25921543 | Zm3 | 79722212 | 79722432 | 215  | 221  |
| Sb3 | 25921702 | 25921836 | Zm3 | 79723516 | 79723650 | 135  | 135  |
| Sb3 | 25923230 | 25923370 | Zm3 | 79733921 | 79734059 | 141  | 139  |
| Sb3 | 25923419 | 25923594 | Zm3 | 79734231 | 79734405 | 176  | 175  |
| Sb3 | 25923785 | 25924855 | Zm3 | 79734649 | 79735716 | 1071 | 1068 |
| Sb3 | 25702801 | 25703032 | Zm3 | 81230577 | 81230805 | 232  | 229  |
| Sb3 | 25704630 | 25704744 | Zm3 | 81231507 | 81231621 | 115  | 115  |
| Sb3 | 25704747 | 25705933 | Zm3 | 81231582 | 81232786 | 1187 | 1205 |
| Sb3 | 25706237 | 25706428 | Zm3 | 81234756 | 81234939 | 192  | 184  |
| Sb3 | 25706534 | 25706928 | Zm3 | 81235075 | 81235465 | 395  | 391  |
| Sb3 | 25719291 | 25719639 | Zm3 | 81236305 | 81236657 | 349  | 353  |
| Sb3 | 25720704 | 25721225 | Zm3 | 81242711 | 81243232 | 522  | 522  |
| Sb3 | 25727150 | 25727386 | Zm3 | 81243755 | 81243991 | 237  | 237  |
| Sb3 | 25733424 | 25733513 | Zm3 | 81255983 | 81256069 | 90   | 87   |
| Sb3 | 25734436 | 25734535 | Zm3 | 81256150 | 81256248 | 100  | 99   |
| Sb3 | 25734599 | 25734661 | Zm3 | 81256312 | 81256374 | 63   | 63   |
| Sb3 | 25736716 | 25737354 | Zm3 | 81278671 | 81279314 | 639  | 644  |
| Sb3 | 25737369 | 25737488 | Zm3 | 81279561 | 81279681 | 120  | 121  |
| Sb3 | 25740476 | 25740824 | Zm3 | 81283710 | 81284058 | 349  | 349  |
| Sb3 | 40433355 | 40433397 | Zm3 | 93476984 | 93477026 | 43   | 43   |
| Sb3 | 40434177 | 40434240 | Zm3 | 93477460 | 93477524 | 64   | 65   |
| Sb3 | 40434463 | 40434528 | Zm3 | 93477661 | 93477727 | 66   | 67   |
| Sb3 | 40434756 | 40434806 | Zm3 | 93477922 | 93477972 | 51   | 51   |
| Sb3 | 42497759 | 42497867 | Zm3 | 94145991 | 94146070 | 109  | 80   |
| Sb3 | 42095614 | 42097226 | Zm3 | 94901701 | 94903320 | 1613 | 1620 |

|     |          |          |     |           |           |      |      |
|-----|----------|----------|-----|-----------|-----------|------|------|
| Sb3 | 42095137 | 42095354 | Zm3 | 94903341  | 94903559  | 218  | 219  |
| Sb3 | 42094989 | 42095078 | Zm3 | 94930338  | 94930422  | 90   | 85   |
| Sb3 | 42094016 | 42094979 | Zm3 | 94938325  | 94939267  | 964  | 943  |
| Sb3 | 23965432 | 23965516 | Zm3 | 144280252 | 144280336 | 85   | 85   |
| Sb3 | 27742394 | 27742724 | Zm3 | 162811844 | 162812174 | 331  | 331  |
| Sb3 | 27742776 | 27744295 | Zm3 | 162812236 | 162813785 | 1520 | 1550 |
| Sb3 | 27744297 | 27744890 | Zm3 | 162814282 | 162814874 | 594  | 593  |
| Sb3 | 27746288 | 27746351 | Zm3 | 162815514 | 162815577 | 64   | 64   |
| Sb3 | 43783586 | 43783718 | Zm3 | 205135614 | 205135745 | 133  | 132  |
| Sb3 | 30312941 | 30313037 | Zm3 | 228336578 | 228336674 | 97   | 97   |
| Sb3 | 32145855 | 32145932 | Zm4 | 10454091  | 10454168  | 78   | 78   |
| Sb3 | 32147081 | 32147374 | Zm4 | 14541728  | 14542018  | 294  | 291  |
| Sb3 | 43575792 | 43575906 | Zm4 | 60770584  | 60770698  | 115  | 115  |
| Sb3 | 38369464 | 38369529 | Zm4 | 111807347 | 111807412 | 66   | 66   |
| Sb3 | 38400510 | 38400575 | Zm4 | 111807347 | 111807412 | 66   | 66   |
| Sb3 | 38364038 | 38364103 | Zm4 | 111807347 | 111807412 | 66   | 66   |
| Sb3 | 40916643 | 40916689 | Zm4 | 139127095 | 139127141 | 47   | 47   |
| Sb3 | 22099770 | 22099905 | Zm4 | 169314135 | 169314270 | 136  | 136  |
| Sb3 | 29765639 | 29765761 | Zm4 | 196317985 | 196318107 | 123  | 123  |
| Sb3 | 29396686 | 29396754 | Zm4 | 203072980 | 203073048 | 69   | 69   |
| Sb3 | 38407564 | 38407796 | Zm4 | 212651244 | 212651481 | 233  | 238  |
| Sb3 | 42664027 | 42664282 | Zm4 | 214822695 | 214822903 | 256  | 209  |
| Sb3 | 38237075 | 38237291 | Zm4 | 233267868 | 233268084 | 217  | 217  |
| Sb3 | 42882125 | 42882204 | Zm4 | 239431486 | 239431565 | 80   | 80   |
| Sb3 | 40916271 | 40916523 | Zm5 | 24814732  | 24814988  | 253  | 257  |
| Sb3 | 40916565 | 40916622 | Zm5 | 24815043  | 24815100  | 58   | 58   |

|     |          |          |     |           |           |     |     |
|-----|----------|----------|-----|-----------|-----------|-----|-----|
| Sb3 | 25921896 | 25921992 | Zm5 | 28597131  | 28597227  | 97  | 97  |
| Sb3 | 38435439 | 38435503 | Zm5 | 30070795  | 30070857  | 65  | 63  |
| Sb3 | 38435260 | 38435392 | Zm5 | 30071295  | 30071371  | 133 | 77  |
| Sb3 | 38408428 | 38408547 | Zm5 | 30071488  | 30071608  | 120 | 121 |
| Sb3 | 38408194 | 38408329 | Zm5 | 30071620  | 30071755  | 136 | 136 |
| Sb3 | 36136010 | 36136096 | Zm5 | 38977265  | 38977351  | 87  | 87  |
| Sb3 | 36136160 | 36136455 | Zm5 | 38977420  | 38977714  | 296 | 295 |
| Sb3 | 36136501 | 36136642 | Zm5 | 38977805  | 38977945  | 142 | 141 |
| Sb3 | 36136662 | 36136775 | Zm5 | 38977996  | 38978104  | 114 | 109 |
| Sb3 | 36136892 | 36137113 | Zm5 | 38978226  | 38978446  | 222 | 221 |
| Sb3 | 36137143 | 36137701 | Zm5 | 38978492  | 38979040  | 559 | 549 |
| Sb3 | 36137737 | 36138376 | Zm5 | 38979053  | 38979688  | 640 | 636 |
| Sb3 | 36138408 | 36138481 | Zm5 | 38979649  | 38979722  | 74  | 74  |
| Sb3 | 36138529 | 36139074 | Zm5 | 38979773  | 38980331  | 546 | 559 |
| Sb3 | 27740326 | 27740446 | Zm5 | 41563509  | 41563632  | 121 | 124 |
| Sb3 | 42083371 | 42083671 | Zm5 | 68607882  | 68608190  | 301 | 309 |
| Sb3 | 42083069 | 42083337 | Zm5 | 68608204  | 68608469  | 269 | 266 |
| Sb3 | 42081456 | 42081516 | Zm5 | 75927616  | 75927676  | 61  | 61  |
| Sb3 | 42881870 | 42881940 | Zm5 | 93743916  | 93743986  | 71  | 71  |
| Sb3 | 24270400 | 24270456 | Zm5 | 100466344 | 100466400 | 57  | 57  |
| Sb3 | 38815922 | 38815975 | Zm5 | 143423481 | 143423534 | 54  | 54  |
| Sb3 | 28365230 | 28365329 | Zm5 | 151040014 | 151040113 | 100 | 100 |
| Sb3 | 36133402 | 36133568 | Zm5 | 156501949 | 156502116 | 167 | 168 |
| Sb3 | 42658146 | 42658181 | Zm5 | 193196974 | 193197009 | 36  | 36  |
| Sb3 | 28878066 | 28878099 | Zm5 | 209144127 | 209144160 | 34  | 34  |
| Sb3 | 38371769 | 38371802 | Zm5 | 209144127 | 209144160 | 34  | 34  |

|     |          |          |     |           |           |     |     |
|-----|----------|----------|-----|-----------|-----------|-----|-----|
| Sb3 | 27447257 | 27447586 | Zm6 | 50478645  | 50478974  | 330 | 330 |
| Sb3 | 30345014 | 30345164 | Zm6 | 97103069  | 97103226  | 151 | 158 |
| Sb3 | 29169653 | 29169714 | Zm6 | 136190086 | 136190147 | 62  | 62  |
| Sb3 | 28520131 | 28520264 | Zm6 | 139788399 | 139788533 | 134 | 135 |
| Sb3 | 28519959 | 28520068 | Zm6 | 139788600 | 139788708 | 110 | 109 |
| Sb3 | 40117634 | 40117710 | Zm6 | 150919155 | 150919231 | 77  | 77  |
| Sb3 | 43832397 | 43832565 | Zm6 | 153252769 | 153252938 | 169 | 170 |
| Sb3 | 43815435 | 43815603 | Zm6 | 153252769 | 153252938 | 169 | 170 |
| Sb3 | 42656408 | 42656522 | Zm7 | 20233158  | 20233268  | 115 | 111 |
| Sb3 | 42656538 | 42656593 | Zm7 | 20233306  | 20233361  | 56  | 56  |
| Sb3 | 42125376 | 42125512 | Zm7 | 22920168  | 22920299  | 137 | 132 |
| Sb3 | 42126446 | 42126577 | Zm7 | 22920989  | 22921120  | 132 | 132 |
| Sb3 | 42127155 | 42127383 | Zm7 | 22923775  | 22924009  | 229 | 235 |
| Sb3 | 42127729 | 42127988 | Zm7 | 22926911  | 22927167  | 260 | 257 |
| Sb3 | 42128201 | 42128320 | Zm7 | 22927356  | 22927479  | 120 | 124 |
| Sb3 | 42129101 | 42129323 | Zm7 | 22942074  | 22942301  | 223 | 228 |
| Sb3 | 42129424 | 42129743 | Zm7 | 22942401  | 22942721  | 320 | 321 |
| Sb3 | 42129964 | 42130574 | Zm7 | 22943421  | 22944033  | 611 | 613 |
| Sb3 | 42130657 | 42130839 | Zm7 | 22944091  | 22944273  | 183 | 183 |
| Sb3 | 42130880 | 42131154 | Zm7 | 22945448  | 22945720  | 275 | 273 |
| Sb3 | 42131220 | 42131961 | Zm7 | 22945786  | 22946503  | 742 | 718 |
| Sb3 | 42131979 | 42132232 | Zm7 | 22946552  | 22946792  | 254 | 241 |
| Sb3 | 28970088 | 28970222 | Zm7 | 52631442  | 52631563  | 135 | 122 |
| Sb3 | 28969853 | 28969994 | Zm7 | 52631675  | 52631813  | 142 | 139 |
| Sb3 | 27982605 | 27982637 | Zm7 | 73636022  | 73636053  | 33  | 32  |
| Sb3 | 43205116 | 43205191 | Zm7 | 143792635 | 143792710 | 76  | 76  |

|     |          |          |     |           |           |     |     |
|-----|----------|----------|-----|-----------|-----------|-----|-----|
| Sb3 | 38437901 | 38438107 | Zm7 | 150367617 | 150367817 | 207 | 201 |
| Sb3 | 25140905 | 25141151 | Zm7 | 155970659 | 155970911 | 247 | 253 |
| Sb3 | 38336541 | 38336847 | Zm7 | 162985847 | 162986170 | 307 | 324 |
| Sb3 | 36131637 | 36131689 | Zm9 | 45541784  | 45541836  | 53  | 53  |
| Sb3 | 26281774 | 26281814 | Zm9 | 47840148  | 47840185  | 41  | 38  |
| Sb3 | 29196421 | 29196561 | Zm9 | 86869650  | 86869790  | 141 | 141 |
| Sb3 | 38336255 | 38336345 | Zm9 | 127234445 | 127234536 | 91  | 92  |
| Sb3 | 38336127 | 38336227 | Zm9 | 127234640 | 127234738 | 101 | 99  |
| Sb3 | 31595962 | 31596006 | Zm9 | 151002208 | 151002248 | 45  | 41  |
| Sb3 | 38815795 | 38815884 | Zm8 | 7886097   | 7886185   | 90  | 89  |
| Sb3 | 30391877 | 30391975 | Zm8 | 10130181  | 10130281  | 99  | 101 |
| Sb3 | 25322046 | 25322288 | Zm8 | 16021671  | 16021919  | 243 | 249 |
| Sb3 | 21008226 | 21008447 | Zm8 | 40552718  | 40552939  | 222 | 222 |
| Sb3 | 21007857 | 21008153 | Zm8 | 40553012  | 40553308  | 297 | 297 |
| Sb3 | 20946757 | 20947029 | Zm8 | 48679843  | 48680138  | 273 | 296 |
| Sb3 | 20936858 | 20936885 | Zm8 | 48680578  | 48680604  | 28  | 27  |
| Sb3 | 20946147 | 20946174 | Zm8 | 48680578  | 48680604  | 28  | 27  |
| Sb3 | 20936724 | 20936780 | Zm8 | 48680683  | 48680739  | 57  | 57  |
| Sb3 | 20946013 | 20946069 | Zm8 | 48680683  | 48680739  | 57  | 57  |
| Sb3 | 20936392 | 20936625 | Zm8 | 48680838  | 48681071  | 234 | 234 |
| Sb3 | 20945681 | 20945914 | Zm8 | 48680838  | 48681071  | 234 | 234 |
| Sb3 | 20936230 | 20936288 | Zm8 | 48681141  | 48681199  | 59  | 59  |
| Sb3 | 20945515 | 20945573 | Zm8 | 48681141  | 48681199  | 59  | 59  |
| Sb3 | 20935842 | 20936141 | Zm8 | 48681276  | 48681575  | 300 | 300 |
| Sb3 | 20945119 | 20945426 | Zm8 | 48681276  | 48681583  | 308 | 308 |
| Sb3 | 20944820 | 20944960 | Zm8 | 48681654  | 48681794  | 141 | 141 |

|     |          |          |     |          |          |     |     |
|-----|----------|----------|-----|----------|----------|-----|-----|
| Sb3 | 20944271 | 20944473 | Zm8 | 48682132 | 48682333 | 203 | 202 |
| Sb3 | 20934505 | 20935010 | Zm8 | 48682672 | 48683179 | 506 | 508 |
| Sb3 | 20943428 | 20943933 | Zm8 | 48682672 | 48683179 | 506 | 508 |
| Sb3 | 20934331 | 20934416 | Zm8 | 48683299 | 48683347 | 86  | 49  |
| Sb3 | 20399747 | 20399787 | Zm8 | 50024636 | 50024676 | 41  | 41  |
| Sb3 | 20398862 | 20398907 | Zm8 | 50025299 | 50025333 | 46  | 35  |
| Sb3 | 20392608 | 20392686 | Zm8 | 50036264 | 50036330 | 79  | 67  |
| Sb3 | 20096570 | 20096946 | Zm8 | 50297562 | 50297932 | 377 | 371 |
| Sb3 | 20097391 | 20097446 | Zm8 | 50298096 | 50298151 | 56  | 56  |
| Sb3 | 20097933 | 20098198 | Zm8 | 50298308 | 50298569 | 266 | 262 |
| Sb3 | 20098405 | 20098458 | Zm8 | 50298762 | 50298815 | 54  | 54  |
| Sb3 | 20096065 | 20096189 | Zm8 | 50328336 | 50328457 | 125 | 122 |
| Sb3 | 20089278 | 20089993 | Zm8 | 50351582 | 50352247 | 716 | 666 |
| Sb3 | 20088762 | 20089186 | Zm8 | 50352404 | 50352811 | 425 | 408 |
| Sb3 | 38794367 | 38794447 | Zm8 | 50898643 | 50898724 | 81  | 82  |
| Sb3 | 38794601 | 38794789 | Zm8 | 50898756 | 50898945 | 189 | 190 |
| Sb3 | 38795284 | 38795353 | Zm8 | 50899442 | 50899511 | 70  | 70  |
| Sb3 | 38795367 | 38795477 | Zm8 | 50899778 | 50899889 | 111 | 112 |
| Sb3 | 38795504 | 38796201 | Zm8 | 50900005 | 50900671 | 698 | 667 |
| Sb3 | 38796217 | 38796582 | Zm8 | 50901644 | 50902008 | 366 | 365 |
| Sb3 | 38796585 | 38796665 | Zm8 | 50902065 | 50902127 | 81  | 63  |
| Sb3 | 38796818 | 38796909 | Zm8 | 50902820 | 50902911 | 92  | 92  |
| Sb3 | 38806984 | 38807600 | Zm8 | 50903396 | 50903985 | 617 | 590 |
| Sb3 | 38815149 | 38815746 | Zm8 | 50905389 | 50906000 | 598 | 612 |
| Sb3 | 38819647 | 38820034 | Zm8 | 50923078 | 50923454 | 388 | 377 |
| Sb3 | 38829281 | 38829818 | Zm8 | 50934249 | 50934776 | 538 | 528 |



|     |          |          |     |          |          |      |      |
|-----|----------|----------|-----|----------|----------|------|------|
| Sb3 | 38829845 | 38829905 | Zm8 | 50934846 | 50934905 | 61   | 60   |
| Sb3 | 38829947 | 38830195 | Zm8 | 50934920 | 50935164 | 249  | 245  |
| Sb3 | 38830246 | 38830329 | Zm8 | 50936540 | 50936620 | 84   | 81   |
| Sb3 | 38830497 | 38830692 | Zm8 | 50936819 | 50937013 | 196  | 195  |
| Sb3 | 38830694 | 38830767 | Zm8 | 50946151 | 50946224 | 74   | 74   |
| Sb3 | 38830976 | 38831533 | Zm8 | 50952875 | 50953433 | 558  | 559  |
| Sb3 | 38836910 | 38837036 | Zm8 | 50955935 | 50956073 | 127  | 139  |
| Sb3 | 38837049 | 38837136 | Zm8 | 50956106 | 50956195 | 88   | 90   |
| Sb3 | 38837324 | 38837619 | Zm8 | 50957400 | 50957693 | 296  | 294  |
| Sb3 | 38837662 | 38837892 | Zm8 | 50957709 | 50957934 | 231  | 226  |
| Sb3 | 38837963 | 38838145 | Zm8 | 50958005 | 50958187 | 183  | 183  |
| Sb3 | 39396922 | 39397068 | Zm8 | 51723484 | 51723634 | 147  | 151  |
| Sb3 | 39397214 | 39397472 | Zm8 | 51723780 | 51724041 | 259  | 262  |
| Sb3 | 39411366 | 39411465 | Zm8 | 51724843 | 51724937 | 100  | 95   |
| Sb3 | 39413398 | 39413594 | Zm8 | 51725119 | 51725311 | 197  | 193  |
| Sb3 | 39414402 | 39414538 | Zm8 | 51733809 | 51733908 | 137  | 100  |
| Sb3 | 39414619 | 39414691 | Zm8 | 51734034 | 51734093 | 73   | 60   |
| Sb3 | 39415587 | 39416091 | Zm8 | 51738210 | 51738715 | 505  | 506  |
| Sb3 | 39416374 | 39416428 | Zm8 | 51751486 | 51751540 | 55   | 55   |
| Sb3 | 39417317 | 39417612 | Zm8 | 51752469 | 51752760 | 296  | 292  |
| Sb3 | 39422069 | 39423624 | Zm8 | 51752834 | 51754359 | 1556 | 1526 |
| Sb3 | 39423702 | 39423808 | Zm8 | 51754462 | 51754556 | 107  | 95   |
| Sb3 | 24866470 | 24866778 | Zm8 | 52411610 | 52411917 | 309  | 308  |
| Sb3 | 24865659 | 24865715 | Zm8 | 52412195 | 52412251 | 57   | 57   |
| Sb3 | 24865258 | 24865355 | Zm8 | 52412534 | 52412628 | 98   | 95   |
| Sb3 | 24864437 | 24865135 | Zm8 | 52431640 | 52432336 | 699  | 697  |

|     |          |          |     |          |          |      |      |
|-----|----------|----------|-----|----------|----------|------|------|
| Sb3 | 24862859 | 24864099 | Zm8 | 52432370 | 52433613 | 1241 | 1244 |
| Sb3 | 24862649 | 24862828 | Zm8 | 52433611 | 52433791 | 180  | 181  |
| Sb3 | 24862326 | 24862615 | Zm8 | 52434009 | 52434291 | 290  | 283  |
| Sb3 | 24861363 | 24862154 | Zm8 | 52440506 | 52441287 | 792  | 782  |
| Sb3 | 24861201 | 24861317 | Zm8 | 52441348 | 52441464 | 117  | 117  |
| Sb3 | 24860941 | 24861121 | Zm8 | 52441551 | 52441729 | 181  | 179  |
| Sb3 | 24860749 | 24860925 | Zm8 | 52450270 | 52450435 | 177  | 166  |
| Sb3 | 24860411 | 24860724 | Zm8 | 52456271 | 52456522 | 314  | 252  |
| Sb3 | 24859785 | 24860405 | Zm8 | 52456983 | 52457606 | 621  | 624  |
| Sb3 | 24859559 | 24859739 | Zm8 | 52457611 | 52457788 | 181  | 178  |
| Sb3 | 37177734 | 37177954 | Zm8 | 52630356 | 52630572 | 221  | 217  |
| Sb3 | 37178008 | 37178094 | Zm8 | 52630630 | 52630713 | 87   | 84   |
| Sb3 | 37178151 | 37178315 | Zm8 | 52630725 | 52630889 | 165  | 165  |
| Sb3 | 37178952 | 37179109 | Zm8 | 52640802 | 52640959 | 158  | 158  |
| Sb3 | 37179409 | 37180063 | Zm8 | 52641088 | 52641732 | 655  | 645  |
| Sb3 | 37180156 | 37180233 | Zm8 | 52649277 | 52649354 | 78   | 78   |
| Sb3 | 37180733 | 37182133 | Zm8 | 52657427 | 52658800 | 1401 | 1374 |
| Sb3 | 37182162 | 37182589 | Zm8 | 52659636 | 52660062 | 428  | 427  |
| Sb3 | 37182595 | 37184126 | Zm8 | 52660107 | 52661650 | 1532 | 1544 |
| Sb3 | 37184172 | 37184762 | Zm8 | 52661696 | 52662289 | 591  | 594  |
| Sb3 | 37184772 | 37184943 | Zm8 | 52662835 | 52663004 | 172  | 170  |
| Sb3 | 37185704 | 37186142 | Zm8 | 52678481 | 52678921 | 439  | 441  |
| Sb3 | 30349316 | 30349768 | Zm8 | 52929736 | 52930191 | 453  | 456  |
| Sb3 | 30349122 | 30349255 | Zm8 | 52930251 | 52930383 | 134  | 133  |
| Sb3 | 30348958 | 30349079 | Zm8 | 52930405 | 52930525 | 122  | 121  |
| Sb3 | 30348713 | 30348801 | Zm8 | 52930698 | 52930786 | 89   | 89   |

|     |          |          |     |          |          |      |      |
|-----|----------|----------|-----|----------|----------|------|------|
| Sb3 | 30347828 | 30347889 | Zm8 | 52931017 | 52931078 | 62   | 62   |
| Sb3 | 30346603 | 30346806 | Zm8 | 52932557 | 52932753 | 204  | 197  |
| Sb3 | 30345263 | 30345333 | Zm8 | 52932758 | 52932829 | 71   | 72   |
| Sb3 | 30329106 | 30329382 | Zm8 | 52932943 | 52933215 | 277  | 273  |
| Sb3 | 30328523 | 30329100 | Zm8 | 52935373 | 52935941 | 578  | 569  |
| Sb3 | 30328407 | 30328515 | Zm8 | 52936271 | 52936379 | 109  | 109  |
| Sb3 | 30321057 | 30321179 | Zm8 | 52936473 | 52936596 | 123  | 124  |
| Sb3 | 30320793 | 30321054 | Zm8 | 52936623 | 52936883 | 262  | 261  |
| Sb3 | 30320680 | 30320747 | Zm8 | 52936884 | 52936951 | 68   | 68   |
| Sb3 | 30320373 | 30320566 | Zm8 | 52937073 | 52937268 | 194  | 196  |
| Sb3 | 30318739 | 30318876 | Zm8 | 52938150 | 52938291 | 138  | 142  |
| Sb3 | 30318354 | 30318722 | Zm8 | 52938283 | 52938650 | 369  | 368  |
| Sb3 | 40615281 | 40615439 | Zm8 | 53137635 | 53137757 | 159  | 123  |
| Sb3 | 44958330 | 44958492 | Zm8 | 53613836 | 53613942 | 163  | 107  |
| Sb3 | 44956386 | 44956452 | Zm8 | 53663014 | 53663080 | 67   | 67   |
| Sb3 | 44955729 | 44955962 | Zm8 | 53690193 | 53690421 | 234  | 229  |
| Sb3 | 44956004 | 44956074 | Zm8 | 53690434 | 53690504 | 71   | 71   |
| Sb3 | 44956109 | 44956314 | Zm8 | 53690512 | 53690726 | 206  | 215  |
| Sb3 | 45321170 | 45321275 | Zm8 | 53849011 | 53849118 | 106  | 108  |
| Sb3 | 45320014 | 45321158 | Zm8 | 53850422 | 53851579 | 1145 | 1158 |
| Sb3 | 45319731 | 45319844 | Zm8 | 53852040 | 53852154 | 114  | 115  |
| Sb3 | 45317545 | 45317653 | Zm8 | 53852265 | 53852353 | 109  | 89   |
| Sb3 | 45316881 | 45316943 | Zm8 | 53852983 | 53853045 | 63   | 63   |
| Sb3 | 46172345 | 46172449 | Zm8 | 54057931 | 54058035 | 105  | 105  |
| Sb3 | 47908292 | 47908547 | Zm8 | 55006145 | 55006400 | 256  | 256  |
| Sb3 | 47908608 | 47908860 | Zm8 | 55006461 | 55006693 | 253  | 233  |

|     |          |          |     |           |           |      |      |
|-----|----------|----------|-----|-----------|-----------|------|------|
| Sb3 | 47909091 | 47910835 | Zm8 | 55006826  | 55008569  | 1745 | 1744 |
| Sb3 | 39031404 | 39031469 | Zm8 | 64071187  | 64071252  | 66   | 66   |
| Sb3 | 46397856 | 46397945 | Zm8 | 72409806  | 72409896  | 90   | 91   |
| Sb3 | 38364462 | 38364505 | Zm8 | 90225906  | 90225949  | 44   | 44   |
| Sb3 | 38369888 | 38369931 | Zm8 | 90225906  | 90225949  | 44   | 44   |
| Sb3 | 46837556 | 46837762 | Zm8 | 91937883  | 91938089  | 207  | 207  |
| Sb3 | 46837934 | 46838163 | Zm8 | 91938262  | 91938491  | 230  | 230  |
| Sb3 | 45924871 | 45925385 | Zm8 | 96147347  | 96147861  | 515  | 515  |
| Sb3 | 45924179 | 45924365 | Zm8 | 96148337  | 96148452  | 187  | 116  |
| Sb3 | 45923388 | 45923569 | Zm8 | 96149216  | 96149279  | 182  | 64   |
| Sb3 | 30200647 | 30200690 | Zm8 | 96150222  | 96150260  | 44   | 39   |
| Sb3 | 30200426 | 30200622 | Zm8 | 96150323  | 96150519  | 197  | 197  |
| Sb3 | 45922157 | 45922278 | Zm8 | 96150461  | 96150581  | 122  | 121  |
| Sb3 | 45921731 | 45921883 | Zm8 | 96150929  | 96151007  | 153  | 79   |
| Sb3 | 38339346 | 38339442 | Zm8 | 127022984 | 127023080 | 97   | 97   |
| Sb3 | 23963654 | 23964027 | Zm8 | 134140411 | 134140775 | 374  | 365  |
| Sb3 | 23964046 | 23964520 | Zm8 | 134141039 | 134141526 | 475  | 488  |
| Sb3 | 26499987 | 26500114 | Zm8 | 154942005 | 154942130 | 128  | 126  |
| Sb3 | 21207936 | 21208022 | Zm8 | 169557342 | 169557428 | 87   | 87   |
| Sb3 | 47933719 | 47933802 | Zm8 | 170938739 | 170938823 | 84   | 85   |
| Sb4 | 27320131 | 27320195 | Zm1 | 9885348   | 9885412   | 65   | 65   |
| Sb4 | 19181809 | 19181981 | Zm1 | 60934430  | 60934607  | 173  | 178  |
| Sb4 | 35758212 | 35758283 | Zm1 | 66844587  | 66844658  | 72   | 72   |
| Sb4 | 21129167 | 21129222 | Zm1 | 187527281 | 187527336 | 56   | 56   |
| Sb4 | 32664279 | 32664596 | Zm1 | 215884834 | 215885151 | 318  | 318  |
| Sb4 | 19272660 | 19272727 | Zm1 | 280876245 | 280876312 | 68   | 68   |

|     |          |          |     |           |           |      |      |
|-----|----------|----------|-----|-----------|-----------|------|------|
| Sb4 | 35052275 | 35052408 | Zm1 | 293033842 | 293033978 | 134  | 137  |
| Sb4 | 24576373 | 24576467 | Zm2 | 21506085  | 21506179  | 95   | 95   |
| Sb4 | 32359845 | 32359991 | Zm2 | 39053706  | 39053852  | 147  | 147  |
| Sb4 | 20908474 | 20908530 | Zm2 | 194108375 | 194108421 | 57   | 47   |
| Sb4 | 20210583 | 20210645 | Zm2 | 210419369 | 210419431 | 63   | 63   |
| Sb4 | 22975466 | 22975764 | Zm3 | 3665714   | 3666003   | 299  | 290  |
| Sb4 | 36637209 | 36637499 | Zm3 | 8613685   | 8613976   | 291  | 292  |
| Sb4 | 36637501 | 36637630 | Zm3 | 8613872   | 8613998   | 130  | 127  |
| Sb4 | 35228019 | 35228108 | Zm3 | 139983839 | 139983929 | 90   | 91   |
| Sb4 | 21018350 | 21018429 | Zm3 | 224507002 | 224507081 | 80   | 80   |
| Sb4 | 25834348 | 25834463 | Zm5 | 18530040  | 18530154  | 116  | 115  |
| Sb4 | 21881712 | 21882405 | Zm5 | 57510548  | 57511244  | 694  | 697  |
| Sb4 | 32256726 | 32257230 | Zm5 | 104891489 | 104891977 | 505  | 489  |
| Sb4 | 32255796 | 32256688 | Zm5 | 104941563 | 104942432 | 893  | 870  |
| Sb4 | 32255569 | 32255716 | Zm5 | 104942486 | 104942625 | 148  | 140  |
| Sb4 | 32251751 | 32251928 | Zm5 | 105007633 | 105007809 | 178  | 177  |
| Sb4 | 32249898 | 32251663 | Zm5 | 105007899 | 105009657 | 1766 | 1759 |
| Sb4 | 32249242 | 32249338 | Zm5 | 105010202 | 105010297 | 97   | 96   |
| Sb4 | 32248874 | 32249198 | Zm5 | 105010317 | 105010647 | 325  | 331  |
| Sb4 | 32242639 | 32242815 | Zm5 | 105026642 | 105026810 | 177  | 169  |
| Sb4 | 32242304 | 32242455 | Zm5 | 105026977 | 105027130 | 152  | 154  |
| Sb4 | 20907760 | 20907823 | Zm5 | 105887880 | 105887936 | 64   | 57   |
| Sb4 | 20903860 | 20903906 | Zm5 | 105890589 | 105890635 | 47   | 47   |
| Sb4 | 20903741 | 20903812 | Zm5 | 105890701 | 105890744 | 72   | 44   |
| Sb4 | 20903595 | 20903671 | Zm5 | 105890823 | 105890901 | 77   | 79   |
| Sb4 | 20900415 | 20900481 | Zm5 | 105914603 | 105914641 | 67   | 39   |

|     |          |          |     |           |           |      |      |
|-----|----------|----------|-----|-----------|-----------|------|------|
| Sb4 | 22025751 | 22025922 | Zm5 | 107009814 | 107009980 | 172  | 167  |
| Sb4 | 22025038 | 22025185 | Zm5 | 107010576 | 107010723 | 148  | 148  |
| Sb4 | 22024144 | 22024470 | Zm5 | 107011377 | 107011696 | 327  | 320  |
| Sb4 | 22023552 | 22023777 | Zm5 | 107011753 | 107011977 | 226  | 225  |
| Sb4 | 22019327 | 22019569 | Zm5 | 107013360 | 107013607 | 243  | 248  |
| Sb4 | 22016618 | 22017085 | Zm5 | 107013716 | 107014178 | 468  | 463  |
| Sb4 | 22010865 | 22011414 | Zm5 | 107022607 | 107023164 | 550  | 558  |
| Sb4 | 22010363 | 22010566 | Zm5 | 107023451 | 107023658 | 204  | 208  |
| Sb4 | 22009137 | 22010190 | Zm5 | 107023813 | 107024883 | 1054 | 1071 |
| Sb4 | 22008353 | 22009086 | Zm5 | 107024918 | 107025650 | 734  | 733  |
| Sb4 | 22007614 | 22008267 | Zm5 | 107025736 | 107026391 | 654  | 656  |
| Sb4 | 22007449 | 22007556 | Zm5 | 107026410 | 107026521 | 108  | 112  |
| Sb4 | 34146210 | 34146289 | Zm5 | 125535133 | 125535212 | 80   | 80   |
| Sb4 | 34146375 | 34146844 | Zm5 | 125535253 | 125535741 | 470  | 489  |
| Sb4 | 34156340 | 34156451 | Zm5 | 125540287 | 125540398 | 112  | 112  |
| Sb4 | 34162154 | 34162328 | Zm5 | 125540720 | 125540887 | 175  | 168  |
| Sb4 | 34162431 | 34162644 | Zm5 | 125541210 | 125541348 | 214  | 139  |
| Sb4 | 34162763 | 34162904 | Zm5 | 125541554 | 125541677 | 142  | 124  |
| Sb4 | 34173321 | 34173385 | Zm5 | 125542615 | 125542680 | 65   | 66   |
| Sb4 | 34173444 | 34173504 | Zm5 | 125542776 | 125542836 | 61   | 61   |
| Sb4 | 34173767 | 34173958 | Zm5 | 125558885 | 125559035 | 192  | 151  |
| Sb4 | 34174025 | 34174139 | Zm5 | 125559137 | 125559251 | 115  | 115  |
| Sb4 | 34178331 | 34178531 | Zm5 | 125559971 | 125560170 | 201  | 200  |
| Sb4 | 34178665 | 34178750 | Zm5 | 125561995 | 125562082 | 86   | 88   |
| Sb4 | 34179565 | 34179591 | Zm5 | 125573495 | 125573521 | 27   | 27   |
| Sb4 | 34179684 | 34179769 | Zm5 | 125573614 | 125573698 | 86   | 85   |

|     |          |          |     |           |           |     |     |
|-----|----------|----------|-----|-----------|-----------|-----|-----|
| Sb4 | 34179976 | 34180095 | Zm5 | 125573905 | 125573990 | 120 | 86  |
| Sb4 | 34184230 | 34184281 | Zm5 | 125581435 | 125581486 | 52  | 52  |
| Sb4 | 34184443 | 34184623 | Zm5 | 125585270 | 125585399 | 181 | 130 |
| Sb4 | 34184758 | 34184803 | Zm5 | 125585604 | 125585644 | 46  | 41  |
| Sb4 | 34193985 | 34194429 | Zm5 | 125593617 | 125594042 | 445 | 426 |
| Sb4 | 34194465 | 34194543 | Zm5 | 125594098 | 125594176 | 79  | 79  |
| Sb4 | 34202056 | 34202458 | Zm5 | 125602542 | 125602960 | 403 | 419 |
| Sb4 | 34202554 | 34203165 | Zm5 | 125603165 | 125603660 | 612 | 496 |
| Sb4 | 34204644 | 34205184 | Zm5 | 125606897 | 125607440 | 541 | 544 |
| Sb4 | 34204055 | 34204481 | Zm5 | 125607998 | 125608434 | 427 | 437 |
| Sb4 | 34203556 | 34203784 | Zm5 | 125625601 | 125625828 | 229 | 228 |
| Sb4 | 36861541 | 36861792 | Zm5 | 125995376 | 125995627 | 252 | 252 |
| Sb4 | 36861389 | 36861535 | Zm5 | 125995604 | 125995749 | 147 | 146 |
| Sb4 | 36860834 | 36861376 | Zm5 | 125995792 | 125996334 | 543 | 543 |
| Sb4 | 36860610 | 36860746 | Zm5 | 125996416 | 125996548 | 137 | 133 |
| Sb4 | 23180771 | 23181538 | Zm5 | 126058878 | 126059642 | 768 | 765 |
| Sb4 | 35063487 | 35063656 | Zm5 | 126108505 | 126108683 | 170 | 179 |
| Sb4 | 35064045 | 35064147 | Zm5 | 126108932 | 126109034 | 103 | 103 |
| Sb4 | 35067820 | 35068080 | Zm5 | 126110837 | 126111112 | 261 | 276 |
| Sb4 | 35242390 | 35242470 | Zm5 | 126126130 | 126126210 | 81  | 81  |
| Sb4 | 35997688 | 35997841 | Zm5 | 126324701 | 126324859 | 154 | 159 |
| Sb4 | 20739451 | 20739493 | Zm5 | 126752078 | 126752109 | 43  | 32  |
| Sb4 | 20735500 | 20735556 | Zm5 | 126812092 | 126812148 | 57  | 57  |
| Sb4 | 20603115 | 20603428 | Zm5 | 126888449 | 126888681 | 314 | 233 |
| Sb4 | 20410770 | 20410845 | Zm5 | 127013764 | 127013840 | 76  | 77  |
| Sb4 | 20408621 | 20408710 | Zm5 | 127033765 | 127033854 | 90  | 90  |

|     |          |          |     |           |           |     |     |
|-----|----------|----------|-----|-----------|-----------|-----|-----|
| Sb4 | 20405425 | 20405535 | Zm5 | 127055359 | 127055475 | 111 | 117 |
| Sb4 | 20206150 | 20206298 | Zm5 | 127094817 | 127094968 | 149 | 152 |
| Sb4 | 20205665 | 20205931 | Zm5 | 127095291 | 127095559 | 267 | 269 |
| Sb4 | 20205285 | 20205441 | Zm5 | 127095862 | 127096007 | 157 | 146 |
| Sb4 | 20204401 | 20204496 | Zm5 | 127096677 | 127096772 | 96  | 96  |
| Sb4 | 19243745 | 19243862 | Zm5 | 130738392 | 130738514 | 118 | 123 |
| Sb4 | 19247153 | 19247217 | Zm5 | 130741887 | 130741951 | 65  | 65  |
| Sb4 | 20122089 | 20122163 | Zm5 | 130843808 | 130843879 | 75  | 72  |
| Sb4 | 20123020 | 20123092 | Zm5 | 130843812 | 130843881 | 73  | 70  |
| Sb4 | 20123382 | 20123446 | Zm5 | 130844241 | 130844305 | 65  | 65  |
| Sb4 | 20123529 | 20123709 | Zm5 | 130844403 | 130844583 | 181 | 181 |
| Sb4 | 20122753 | 20122813 | Zm5 | 130845074 | 130845136 | 61  | 63  |
| Sb4 | 20124291 | 20124336 | Zm5 | 130845962 | 130846007 | 46  | 46  |
| Sb4 | 20157697 | 20157843 | Zm5 | 130852180 | 130852325 | 147 | 146 |
| Sb4 | 20157188 | 20157629 | Zm5 | 130852370 | 130852802 | 442 | 433 |
| Sb4 | 20157072 | 20157148 | Zm5 | 130852827 | 130852903 | 77  | 77  |
| Sb4 | 20171095 | 20171439 | Zm5 | 130902103 | 130902462 | 345 | 360 |
| Sb4 | 20171443 | 20171679 | Zm5 | 130902383 | 130902619 | 237 | 237 |
| Sb4 | 20171711 | 20172010 | Zm5 | 130902632 | 130902942 | 300 | 311 |
| Sb4 | 20172059 | 20172131 | Zm5 | 130903000 | 130903072 | 73  | 73  |
| Sb4 | 20172817 | 20172960 | Zm5 | 130903547 | 130903691 | 144 | 145 |
| Sb4 | 20179001 | 20179051 | Zm5 | 130905866 | 130905916 | 51  | 51  |
| Sb4 | 24574738 | 24575246 | Zm5 | 158157053 | 158157560 | 509 | 508 |
| Sb4 | 24580715 | 24580902 | Zm5 | 158158682 | 158158880 | 188 | 199 |
| Sb4 | 24586019 | 24586210 | Zm5 | 158158908 | 158159102 | 192 | 195 |
| Sb4 | 24586574 | 24586688 | Zm5 | 158159141 | 158159257 | 115 | 117 |



|     |          |          |     |           |           |     |     |
|-----|----------|----------|-----|-----------|-----------|-----|-----|
| Sb4 | 24586699 | 24587009 | Zm5 | 158159613 | 158159922 | 311 | 310 |
| Sb4 | 24593067 | 24593257 | Zm5 | 158159948 | 158160142 | 191 | 195 |
| Sb4 | 24593262 | 24593575 | Zm5 | 158161973 | 158162283 | 314 | 311 |
| Sb4 | 24593593 | 24594226 | Zm5 | 158162474 | 158163113 | 634 | 640 |
| Sb4 | 24594279 | 24594396 | Zm5 | 158163130 | 158163248 | 118 | 119 |
| Sb4 | 24595432 | 24595894 | Zm5 | 158163482 | 158163926 | 463 | 445 |
| Sb4 | 24595936 | 24596046 | Zm5 | 158164013 | 158164123 | 111 | 111 |
| Sb4 | 20206407 | 20206467 | Zm5 | 205283903 | 205283937 | 61  | 35  |
| Sb4 | 33942007 | 33942100 | Zm6 | 21901514  | 21901607  | 94  | 94  |
| Sb4 | 19622935 | 19623033 | Zm6 | 43289851  | 43289949  | 99  | 99  |
| Sb4 | 20334699 | 20335011 | Zm6 | 65206125  | 65206432  | 313 | 308 |
| Sb4 | 22338495 | 22338559 | Zm6 | 111329281 | 111329345 | 65  | 65  |
| Sb4 | 22338744 | 22338892 | Zm6 | 111329649 | 111329794 | 149 | 146 |
| Sb4 | 19047008 | 19047139 | Zm6 | 134767878 | 134768009 | 132 | 132 |
| Sb4 | 19175796 | 19175869 | Zm6 | 138425343 | 138425405 | 74  | 63  |
| Sb4 | 24201062 | 24201111 | Zm7 | 1299802   | 1299851   | 50  | 50  |
| Sb4 | 35851001 | 35851166 | Zm7 | 19363235  | 19363297  | 166 | 63  |
| Sb4 | 20180066 | 20180144 | Zm7 | 42573734  | 42573814  | 79  | 81  |
| Sb4 | 19326859 | 19326943 | Zm7 | 58045182  | 58045266  | 85  | 85  |
| Sb4 | 19326614 | 19326720 | Zm7 | 58045475  | 58045581  | 107 | 107 |
| Sb4 | 34140732 | 34140821 | Zm7 | 92961059  | 92961148  | 90  | 90  |
| Sb4 | 33481252 | 33481299 | Zm7 | 156067142 | 156067189 | 48  | 48  |
| Sb4 | 24573860 | 24573979 | Zm7 | 160546361 | 160546477 | 120 | 117 |
| Sb4 | 24573592 | 24573777 | Zm7 | 160546560 | 160546743 | 186 | 184 |
| Sb4 | 21881285 | 21881583 | Zm8 | 53851251  | 53851551  | 299 | 301 |
| Sb4 | 21881091 | 21881167 | Zm8 | 53851667  | 53851743  | 77  | 77  |

|     |          |          |     |           |           |     |     |
|-----|----------|----------|-----|-----------|-----------|-----|-----|
| Sb4 | 21880988 | 21881030 | Zm8 | 53852112  | 53852153  | 43  | 42  |
| Sb4 | 21880792 | 21880885 | Zm8 | 53852254  | 53852353  | 94  | 100 |
| Sb4 | 20174994 | 20175071 | Zm8 | 119902504 | 119902581 | 78  | 78  |
| Sb4 | 34193887 | 34193960 | Zm8 | 119902504 | 119902577 | 74  | 74  |
| Sb4 | 22340488 | 22340622 | Zm9 | 23098829  | 23098963  | 135 | 135 |
| Sb4 | 19973398 | 19973447 | Zm9 | 110286320 | 110286369 | 50  | 50  |
| Sb4 | 24572417 | 24572465 | Zm9 | 114474813 | 114474861 | 49  | 49  |
| Sb4 | 19139191 | 19139250 | Zm9 | 133091925 | 133091984 | 60  | 60  |
| Sb4 | 40309384 | 40309535 | Zm4 | 5381426   | 5381577   | 152 | 152 |
| Sb4 | 45665860 | 45665920 | Zm4 | 6609551   | 6609611   | 61  | 61  |
| Sb4 | 43522823 | 43523130 | Zm4 | 34385402  | 34385698  | 308 | 297 |
| Sb4 | 41057911 | 41058047 | Zm4 | 37159284  | 37159415  | 137 | 132 |
| Sb4 | 42961136 | 42961247 | Zm4 | 78146222  | 78146333  | 112 | 112 |
| Sb4 | 19709162 | 19709218 | Zm4 | 89328069  | 89328125  | 57  | 57  |
| Sb4 | 44138981 | 44139076 | Zm4 | 99992055  | 99992117  | 96  | 63  |
| Sb4 | 43404968 | 43405037 | Zm4 | 100196085 | 100196149 | 70  | 65  |
| Sb4 | 43902553 | 43902632 | Zm4 | 100613621 | 100613697 | 80  | 77  |
| Sb4 | 43904036 | 43904077 | Zm4 | 100615052 | 100615086 | 42  | 35  |
| Sb4 | 43905713 | 43905847 | Zm4 | 100618031 | 100618140 | 135 | 110 |
| Sb4 | 43907012 | 43907114 | Zm4 | 100619562 | 100619648 | 103 | 87  |
| Sb4 | 43909517 | 43909596 | Zm4 | 100625438 | 100625496 | 80  | 59  |
| Sb4 | 43912564 | 43912745 | Zm4 | 100628933 | 100629128 | 182 | 196 |
| Sb4 | 43915192 | 43915235 | Zm4 | 100637707 | 100637750 | 44  | 44  |
| Sb4 | 37839469 | 37839586 | Zm4 | 100844897 | 100845014 | 118 | 118 |
| Sb4 | 37839190 | 37839264 | Zm4 | 100845238 | 100845292 | 75  | 55  |
| Sb4 | 37838436 | 37838482 | Zm4 | 100846022 | 100846051 | 47  | 30  |

|     |          |          |     |           |           |      |      |
|-----|----------|----------|-----|-----------|-----------|------|------|
| Sb4 | 37838236 | 37838338 | Zm4 | 100846216 | 100846304 | 103  | 89   |
| Sb4 | 37837955 | 37838027 | Zm4 | 100846539 | 100846599 | 73   | 61   |
| Sb4 | 37837746 | 37837890 | Zm4 | 100846672 | 100846815 | 145  | 144  |
| Sb4 | 37835989 | 37836142 | Zm4 | 100847810 | 100847961 | 154  | 152  |
| Sb4 | 37835794 | 37835889 | Zm4 | 100848075 | 100848171 | 96   | 97   |
| Sb4 | 37944867 | 37945311 | Zm4 | 101202482 | 101202944 | 445  | 463  |
| Sb4 | 37945341 | 37945484 | Zm4 | 101203001 | 101203130 | 144  | 130  |
| Sb4 | 37945847 | 37945938 | Zm4 | 101203282 | 101203374 | 92   | 93   |
| Sb4 | 37945963 | 37946189 | Zm4 | 101203710 | 101203938 | 227  | 229  |
| Sb4 | 37946211 | 37947516 | Zm4 | 101203988 | 101205288 | 1306 | 1301 |
| Sb4 | 37947610 | 37947651 | Zm4 | 101205384 | 101205425 | 42   | 42   |
| Sb4 | 37947750 | 37947995 | Zm4 | 101205524 | 101205772 | 246  | 249  |
| Sb4 | 37948011 | 37948280 | Zm4 | 101205807 | 101206091 | 270  | 285  |
| Sb4 | 37948432 | 37948478 | Zm4 | 101206286 | 101206332 | 47   | 47   |
| Sb4 | 37948645 | 37948858 | Zm4 | 101222192 | 101222410 | 214  | 219  |
| Sb4 | 37949102 | 37949437 | Zm4 | 101222553 | 101222870 | 336  | 318  |
| Sb4 | 37955371 | 37955469 | Zm4 | 101223069 | 101223166 | 99   | 98   |
| Sb4 | 37955501 | 37955568 | Zm4 | 101223170 | 101223225 | 68   | 56   |
| Sb4 | 37956992 | 37957264 | Zm4 | 101224657 | 101224919 | 273  | 263  |
| Sb4 | 38350502 | 38350842 | Zm4 | 101468870 | 101469191 | 341  | 322  |
| Sb4 | 38359408 | 38359704 | Zm4 | 101469749 | 101470036 | 297  | 288  |
| Sb4 | 38359775 | 38359868 | Zm4 | 101470063 | 101470156 | 94   | 94   |
| Sb4 | 38360145 | 38360410 | Zm4 | 101470505 | 101470770 | 266  | 266  |
| Sb4 | 38360597 | 38360714 | Zm4 | 101471119 | 101471233 | 118  | 115  |
| Sb4 | 38360807 | 38361071 | Zm4 | 101471330 | 101471583 | 265  | 254  |
| Sb4 | 41074368 | 41074471 | Zm4 | 101659340 | 101659441 | 104  | 102  |

|     |          |          |     |           |           |      |      |
|-----|----------|----------|-----|-----------|-----------|------|------|
| Sb4 | 41010340 | 41011527 | Zm4 | 101659999 | 101661161 | 1188 | 1163 |
| Sb4 | 41010206 | 41010291 | Zm4 | 101661399 | 101661481 | 86   | 83   |
| Sb4 | 41009059 | 41009152 | Zm4 | 101662270 | 101662364 | 94   | 95   |
| Sb4 | 41008668 | 41008989 | Zm4 | 101662377 | 101662682 | 322  | 306  |
| Sb4 | 41008210 | 41008267 | Zm4 | 101662960 | 101663016 | 58   | 57   |
| Sb4 | 41007628 | 41008203 | Zm4 | 101663135 | 101663716 | 576  | 582  |
| Sb4 | 40038632 | 40038716 | Zm4 | 137275270 | 137275323 | 85   | 54   |
| Sb4 | 40037124 | 40037229 | Zm4 | 154962590 | 154962693 | 106  | 104  |
| Sb4 | 44631082 | 44631223 | Zm4 | 168241623 | 168241764 | 142  | 142  |
| Sb4 | 43410832 | 43410876 | Zm4 | 170074071 | 170074115 | 45   | 45   |
| Sb4 | 43410989 | 43411119 | Zm4 | 170074192 | 170074324 | 131  | 133  |
| Sb4 | 19649486 | 19649679 | Zm4 | 183920516 | 183920716 | 194  | 201  |
| Sb4 | 19646569 | 19646714 | Zm4 | 183921110 | 183921255 | 146  | 146  |
| Sb4 | 19636721 | 19636875 | Zm4 | 183921645 | 183921799 | 155  | 155  |
| Sb4 | 19636192 | 19636400 | Zm4 | 183922163 | 183922371 | 209  | 209  |
| Sb4 | 19627339 | 19627496 | Zm4 | 183922612 | 183922769 | 158  | 158  |
| Sb4 | 19626675 | 19626778 | Zm4 | 183923034 | 183923137 | 104  | 104  |
| Sb4 | 19626173 | 19626278 | Zm4 | 183923608 | 183923713 | 106  | 106  |
| Sb4 | 19625864 | 19626007 | Zm4 | 183923784 | 183923922 | 144  | 139  |
| Sb4 | 19625384 | 19625506 | Zm4 | 183924100 | 183924222 | 123  | 123  |
| Sb4 | 39427119 | 39427258 | Zm4 | 187890587 | 187890726 | 140  | 140  |
| Sb4 | 39427386 | 39427527 | Zm4 | 187890876 | 187890997 | 142  | 122  |
| Sb4 | 39427609 | 39427826 | Zm4 | 187891179 | 187891282 | 218  | 104  |
| Sb4 | 39427908 | 39428152 | Zm4 | 187891341 | 187891575 | 245  | 235  |
| Sb4 | 39428234 | 39428415 | Zm4 | 187891704 | 187891833 | 182  | 130  |
| Sb4 | 39428450 | 39428535 | Zm4 | 187891859 | 187891944 | 86   | 86   |

|     |          |          |     |           |           |      |      |
|-----|----------|----------|-----|-----------|-----------|------|------|
| Sb4 | 39302189 | 39302234 | Zm4 | 188313705 | 188313750 | 46   | 46   |
| Sb4 | 26764466 | 26764605 | Zm4 | 188883007 | 188883142 | 140  | 136  |
| Sb4 | 26764640 | 26765148 | Zm4 | 188883142 | 188883653 | 509  | 512  |
| Sb4 | 26765900 | 26766585 | Zm4 | 188885424 | 188886116 | 686  | 693  |
| Sb4 | 26767271 | 26767353 | Zm4 | 188886557 | 188886639 | 83   | 83   |
| Sb4 | 26767518 | 26767825 | Zm4 | 188886793 | 188887102 | 308  | 310  |
| Sb4 | 26770211 | 26771301 | Zm4 | 188887108 | 188888201 | 1091 | 1094 |
| Sb4 | 26771662 | 26771741 | Zm4 | 188888527 | 188888607 | 80   | 81   |
| Sb4 | 26772477 | 26772552 | Zm4 | 189076257 | 189076332 | 76   | 76   |
| Sb4 | 34763863 | 34764035 | Zm4 | 189078096 | 189078271 | 173  | 176  |
| Sb4 | 34764238 | 34764514 | Zm4 | 189078461 | 189078737 | 277  | 277  |
| Sb4 | 34773930 | 34773999 | Zm4 | 189080111 | 189080180 | 70   | 70   |
| Sb4 | 34774858 | 34774968 | Zm4 | 189080435 | 189080545 | 111  | 111  |
| Sb4 | 34775770 | 34776157 | Zm4 | 189082554 | 189082941 | 388  | 388  |
| Sb4 | 34776275 | 34776410 | Zm4 | 189083018 | 189083153 | 136  | 136  |
| Sb4 | 34786344 | 34786648 | Zm4 | 189091707 | 189092011 | 305  | 305  |
| Sb4 | 34786773 | 34787199 | Zm4 | 189092105 | 189092519 | 427  | 415  |
| Sb4 | 34787247 | 34787421 | Zm4 | 189092720 | 189092894 | 175  | 175  |
| Sb4 | 33446829 | 33446918 | Zm4 | 193582611 | 193582697 | 90   | 87   |
| Sb4 | 44801188 | 44801672 | Zm4 | 223205899 | 223206377 | 485  | 479  |
| Sb4 | 44800455 | 44800857 | Zm4 | 223206826 | 223207135 | 403  | 310  |
| Sb4 | 44800147 | 44800397 | Zm4 | 223207189 | 223207437 | 251  | 249  |
| Sb4 | 44798797 | 44798942 | Zm4 | 223207567 | 223207712 | 146  | 146  |
| Sb4 | 44798650 | 44798717 | Zm4 | 223207759 | 223207826 | 68   | 68   |
| Sb4 | 44798218 | 44798265 | Zm4 | 223207886 | 223207929 | 48   | 44   |
| Sb4 | 44797742 | 44798092 | Zm4 | 223208058 | 223208408 | 351  | 351  |

|     |          |          |     |           |           |      |      |
|-----|----------|----------|-----|-----------|-----------|------|------|
| Sb4 | 44794736 | 44797664 | Zm4 | 223208486 | 223211392 | 2929 | 2907 |
| Sb4 | 44794080 | 44794321 | Zm4 | 223211731 | 223211980 | 242  | 250  |
| Sb4 | 44821142 | 44821192 | Zm4 | 223301753 | 223301791 | 51   | 39   |
| Sb4 | 44821790 | 44821820 | Zm4 | 223302746 | 223302776 | 31   | 31   |
| Sb4 | 44824689 | 44825163 | Zm4 | 223305793 | 223306270 | 475  | 478  |
| Sb4 | 44825197 | 44825315 | Zm4 | 223306330 | 223306448 | 119  | 119  |
| Sb4 | 44825324 | 44825562 | Zm4 | 223311357 | 223311574 | 239  | 218  |
| Sb4 | 44986479 | 44986518 | Zm4 | 223537732 | 223537771 | 40   | 40   |
| Sb4 | 44986640 | 44986805 | Zm4 | 223537893 | 223538058 | 166  | 166  |
| Sb4 | 44987858 | 44987896 | Zm4 | 223539380 | 223539415 | 39   | 36   |
| Sb4 | 44988140 | 44988213 | Zm4 | 223539666 | 223539735 | 74   | 70   |
| Sb4 | 44988225 | 44988748 | Zm4 | 223539777 | 223540305 | 524  | 529  |
| Sb4 | 44988882 | 44989088 | Zm4 | 223543574 | 223543775 | 207  | 202  |
| Sb4 | 44989550 | 44989901 | Zm4 | 223544411 | 223544708 | 352  | 298  |
| Sb4 | 44991738 | 44991785 | Zm4 | 223546159 | 223546206 | 48   | 48   |
| Sb4 | 44992076 | 44992139 | Zm4 | 223546497 | 223546541 | 64   | 45   |
| Sb4 | 44992671 | 44992730 | Zm4 | 223547096 | 223547155 | 60   | 60   |
| Sb4 | 44993411 | 44993471 | Zm4 | 223547844 | 223547898 | 61   | 55   |
| Sb4 | 44993488 | 44993952 | Zm4 | 223548092 | 223548536 | 465  | 445  |
| Sb4 | 44994503 | 44994870 | Zm4 | 223548763 | 223549098 | 368  | 336  |
| Sb4 | 44994883 | 44995153 | Zm4 | 223549151 | 223549416 | 271  | 266  |
| Sb4 | 44995243 | 44995313 | Zm4 | 223549506 | 223549576 | 71   | 71   |
| Sb4 | 45866259 | 45866704 | Zm4 | 223696747 | 223697192 | 446  | 446  |
| Sb4 | 33488454 | 33488568 | Zm4 | 223953929 | 223954041 | 115  | 113  |
| Sb4 | 20976340 | 20976680 | Zm4 | 224194764 | 224195119 | 341  | 356  |
| Sb4 | 20975972 | 20976190 | Zm4 | 224195306 | 224195514 | 219  | 209  |

|     |          |          |     |           |           |      |      |
|-----|----------|----------|-----|-----------|-----------|------|------|
| Sb4 | 20975698 | 20975809 | Zm4 | 224195675 | 224195789 | 112  | 115  |
| Sb4 | 42206667 | 42206740 | Zm4 | 224363123 | 224363195 | 74   | 73   |
| Sb4 | 42205119 | 42206610 | Zm4 | 224363246 | 224364745 | 1492 | 1500 |
| Sb4 | 42205024 | 42205076 | Zm4 | 224364850 | 224364902 | 53   | 53   |
| Sb4 | 42203013 | 42203757 | Zm4 | 224367615 | 224368365 | 745  | 751  |
| Sb4 | 42195369 | 42195466 | Zm4 | 224368674 | 224368772 | 98   | 99   |
| Sb4 | 42195112 | 42195281 | Zm4 | 224368771 | 224368957 | 170  | 187  |
| Sb4 | 42194586 | 42194863 | Zm4 | 224369005 | 224369288 | 278  | 284  |
| Sb4 | 42194393 | 42194531 | Zm4 | 224369341 | 224369479 | 139  | 139  |
| Sb4 | 42194094 | 42194321 | Zm4 | 224369599 | 224369818 | 228  | 220  |
| Sb4 | 42192903 | 42193724 | Zm4 | 224369873 | 224370699 | 822  | 827  |
| Sb4 | 42189605 | 42189687 | Zm4 | 224376008 | 224376090 | 83   | 83   |
| Sb4 | 42189220 | 42189596 | Zm4 | 224376129 | 224376495 | 377  | 367  |
| Sb4 | 42188552 | 42189157 | Zm4 | 224377623 | 224378237 | 606  | 615  |
| Sb4 | 42188206 | 42188491 | Zm4 | 224378944 | 224379241 | 286  | 298  |
| Sb4 | 42187459 | 42188081 | Zm4 | 224379697 | 224380286 | 623  | 590  |
| Sb4 | 42187023 | 42187457 | Zm4 | 224380970 | 224381405 | 435  | 436  |
| Sb4 | 42186827 | 42186979 | Zm4 | 224381468 | 224381617 | 153  | 150  |
| Sb4 | 42185216 | 42185638 | Zm4 | 224400942 | 224401347 | 423  | 406  |
| Sb4 | 42184539 | 42185116 | Zm4 | 224401424 | 224401997 | 578  | 574  |
| Sb4 | 42179303 | 42179444 | Zm4 | 224403835 | 224403960 | 142  | 126  |
| Sb4 | 42179174 | 42179300 | Zm4 | 224404435 | 224404561 | 127  | 127  |
| Sb4 | 42178474 | 42179088 | Zm4 | 224404704 | 224405318 | 615  | 615  |
| Sb4 | 42177736 | 42178450 | Zm4 | 224405316 | 224406049 | 715  | 734  |
| Sb4 | 42176467 | 42176985 | Zm4 | 224409492 | 224410006 | 519  | 515  |
| Sb4 | 42175399 | 42175479 | Zm4 | 224410992 | 224411072 | 81   | 81   |

|     |          |          |     |           |           |      |      |
|-----|----------|----------|-----|-----------|-----------|------|------|
| Sb4 | 42169959 | 42170026 | Zm4 | 224422779 | 224422846 | 68   | 68   |
| Sb4 | 42169153 | 42169852 | Zm4 | 224422911 | 224423599 | 700  | 689  |
| Sb4 | 42163715 | 42163860 | Zm4 | 224423605 | 224423746 | 146  | 142  |
| Sb4 | 42163457 | 42163491 | Zm4 | 224425632 | 224425665 | 35   | 34   |
| Sb4 | 42163231 | 42163292 | Zm4 | 224425983 | 224426039 | 62   | 57   |
| Sb4 | 42162045 | 42162543 | Zm4 | 224435539 | 224436036 | 499  | 498  |
| Sb4 | 42161878 | 42162025 | Zm4 | 224436079 | 224436223 | 148  | 145  |
| Sb4 | 42160475 | 42160789 | Zm4 | 224441839 | 224442144 | 315  | 306  |
| Sb4 | 42159169 | 42160203 | Zm4 | 224450827 | 224451863 | 1035 | 1037 |
| Sb4 | 42157199 | 42157293 | Zm4 | 224452856 | 224452952 | 95   | 97   |
| Sb4 | 42147259 | 42147896 | Zm4 | 224456024 | 224456654 | 638  | 631  |
| Sb4 | 42145970 | 42146169 | Zm4 | 224456688 | 224456875 | 200  | 188  |
| Sb4 | 42145773 | 42145940 | Zm4 | 224457045 | 224457211 | 168  | 167  |
| Sb4 | 42142306 | 42145727 | Zm4 | 224457587 | 224460988 | 3422 | 3402 |
| Sb4 | 42126802 | 42128636 | Zm4 | 224464834 | 224466676 | 1835 | 1843 |
| Sb4 | 42126489 | 42126759 | Zm4 | 224467324 | 224467593 | 271  | 270  |
| Sb4 | 42126282 | 42126369 | Zm4 | 224467612 | 224467701 | 88   | 90   |
| Sb4 | 42125421 | 42126207 | Zm4 | 224468224 | 224469008 | 787  | 785  |
| Sb4 | 42125239 | 42125396 | Zm4 | 224473051 | 224473201 | 158  | 151  |
| Sb4 | 42123615 | 42125095 | Zm4 | 224476163 | 224477652 | 1481 | 1490 |
| Sb4 | 42122755 | 42123608 | Zm4 | 224478191 | 224478994 | 854  | 804  |
| Sb4 | 42121625 | 42122733 | Zm4 | 224479041 | 224480139 | 1109 | 1099 |
| Sb4 | 42118962 | 42119103 | Zm4 | 224480416 | 224480557 | 142  | 142  |
| Sb4 | 42118698 | 42118752 | Zm4 | 224480687 | 224480741 | 55   | 55   |
| Sb4 | 42118524 | 42118649 | Zm4 | 224480785 | 224480911 | 126  | 127  |
| Sb4 | 41941639 | 41941750 | Zm4 | 224558618 | 224558720 | 112  | 103  |



|     |          |          |     |           |           |     |     |
|-----|----------|----------|-----|-----------|-----------|-----|-----|
| Sb4 | 41586711 | 41586866 | Zm4 | 224624109 | 224624266 | 156 | 158 |
| Sb4 | 41586320 | 41586647 | Zm4 | 224624281 | 224624608 | 328 | 328 |
| Sb4 | 41586217 | 41586315 | Zm4 | 224625067 | 224625165 | 99  | 99  |
| Sb4 | 41585714 | 41585973 | Zm4 | 224625359 | 224625617 | 260 | 259 |
| Sb4 | 41573555 | 41573742 | Zm4 | 224645059 | 224645245 | 188 | 187 |
| Sb4 | 41572917 | 41573433 | Zm4 | 224650809 | 224651313 | 517 | 505 |
| Sb4 | 41572636 | 41572814 | Zm4 | 224651364 | 224651541 | 179 | 178 |
| Sb4 | 41572453 | 41572604 | Zm4 | 224651543 | 224651694 | 152 | 152 |
| Sb4 | 41572312 | 41572441 | Zm4 | 224651790 | 224651912 | 130 | 123 |
| Sb4 | 41570077 | 41570468 | Zm4 | 224652313 | 224652692 | 392 | 380 |
| Sb4 | 41569953 | 41570015 | Zm4 | 224652771 | 224652832 | 63  | 62  |
| Sb4 | 41569722 | 41569884 | Zm4 | 224652879 | 224653041 | 163 | 163 |
| Sb4 | 41569355 | 41569650 | Zm4 | 224653536 | 224653830 | 296 | 295 |
| Sb4 | 41568877 | 41569260 | Zm4 | 224653930 | 224654317 | 384 | 388 |
| Sb4 | 41568399 | 41568499 | Zm4 | 224654435 | 224654532 | 101 | 98  |
| Sb4 | 41567982 | 41568307 | Zm4 | 224654571 | 224654896 | 326 | 326 |
| Sb4 | 41564808 | 41565361 | Zm4 | 224677952 | 224678504 | 554 | 553 |
| Sb4 | 22730657 | 22730796 | Zm4 | 224900740 | 224900875 | 140 | 136 |
| Sb4 | 22730458 | 22730632 | Zm4 | 224900897 | 224901077 | 175 | 181 |
| Sb4 | 22729917 | 22730392 | Zm4 | 224901140 | 224901609 | 476 | 470 |
| Sb4 | 22729080 | 22729875 | Zm4 | 224901651 | 224902425 | 796 | 775 |
| Sb4 | 22728712 | 22728833 | Zm4 | 224902795 | 224902916 | 122 | 122 |
| Sb4 | 22718342 | 22718562 | Zm4 | 224904610 | 224904817 | 221 | 208 |
| Sb4 | 22717935 | 22718034 | Zm4 | 224904983 | 224905080 | 100 | 98  |
| Sb4 | 22715531 | 22715602 | Zm4 | 224905259 | 224905330 | 72  | 72  |
| Sb4 | 22715251 | 22715451 | Zm4 | 224905865 | 224906073 | 201 | 209 |

|     |          |          |     |           |           |      |      |
|-----|----------|----------|-----|-----------|-----------|------|------|
| Sb4 | 22714855 | 22714968 | Zm4 | 224906224 | 224906337 | 114  | 114  |
| Sb4 | 22713921 | 22714645 | Zm4 | 224906819 | 224907547 | 725  | 729  |
| Sb4 | 37359488 | 37359633 | Zm4 | 225106359 | 225106468 | 146  | 110  |
| Sb4 | 37359866 | 37359954 | Zm4 | 225106784 | 225106871 | 89   | 88   |
| Sb4 | 37360018 | 37360104 | Zm4 | 225107149 | 225107234 | 87   | 86   |
| Sb4 | 37361563 | 37361641 | Zm4 | 225108701 | 225108775 | 79   | 75   |
| Sb4 | 37366699 | 37367901 | Zm4 | 225108770 | 225109982 | 1203 | 1213 |
| Sb4 | 37368587 | 37368724 | Zm4 | 225110062 | 225110187 | 138  | 126  |
| Sb4 | 37368771 | 37368971 | Zm4 | 225110800 | 225110997 | 201  | 198  |
| Sb4 | 37369135 | 37369736 | Zm4 | 225111122 | 225111720 | 602  | 599  |
| Sb4 | 37369809 | 37369939 | Zm4 | 225117339 | 225117459 | 131  | 121  |
| Sb4 | 37370201 | 37370610 | Zm4 | 225117749 | 225118119 | 410  | 371  |
| Sb4 | 37370701 | 37371154 | Zm4 | 225118254 | 225118700 | 454  | 447  |
| Sb4 | 21950939 | 21951066 | Zm4 | 225225237 | 225225370 | 128  | 134  |
| Sb4 | 21951155 | 21951561 | Zm4 | 225225449 | 225225874 | 407  | 426  |
| Sb4 | 21951622 | 21951932 | Zm4 | 225225900 | 225226208 | 311  | 309  |
| Sb4 | 21953150 | 21954625 | Zm4 | 225227192 | 225228646 | 1476 | 1455 |
| Sb4 | 21954754 | 21955064 | Zm4 | 225228721 | 225229024 | 311  | 304  |
| Sb4 | 20901880 | 20902002 | Zm4 | 225407580 | 225407653 | 123  | 74   |
| Sb4 | 20902549 | 20902625 | Zm4 | 225408299 | 225408375 | 77   | 77   |
| Sb4 | 20903321 | 20903532 | Zm4 | 225417402 | 225417615 | 212  | 214  |
| Sb4 | 20910188 | 20910226 | Zm4 | 225426108 | 225426144 | 39   | 37   |
| Sb4 | 41903944 | 41904270 | Zm4 | 242580231 | 242580549 | 327  | 319  |
| Sb5 | 33364771 | 33364896 | Zm1 | 6183995   | 6184120   | 126  | 126  |
| Sb5 | 24828981 | 24829042 | Zm1 | 56173192  | 56173253  | 62   | 62   |
| Sb5 | 29036495 | 29036554 | Zm1 | 137037486 | 137037545 | 60   | 60   |

|     |          |          |      |           |           |     |     |
|-----|----------|----------|------|-----------|-----------|-----|-----|
| Sb5 | 22184193 | 22184273 | Zm1  | 226660269 | 226660349 | 81  | 81  |
| Sb5 | 27028711 | 27028807 | Zm1  | 260042828 | 260042924 | 97  | 97  |
| Sb5 | 27028832 | 27028948 | Zm1  | 260043028 | 260043144 | 117 | 117 |
| Sb5 | 27029077 | 27029395 | Zm1  | 260044414 | 260044735 | 319 | 322 |
| Sb5 | 33161781 | 33161926 | Zm1  | 274386293 | 274386436 | 146 | 144 |
| Sb5 | 33161261 | 33161628 | Zm1  | 274386611 | 274386973 | 368 | 363 |
| Sb5 | 35569551 | 35569689 | Zm10 | 13544975  | 13545106  | 139 | 132 |
| Sb5 | 24178097 | 24178138 | Zm10 | 96271955  | 96271996  | 42  | 42  |
| Sb5 | 24221564 | 24221706 | Zm10 | 96272424  | 96272561  | 143 | 138 |
| Sb5 | 24396125 | 24396387 | Zm10 | 126597380 | 126597652 | 263 | 273 |
| Sb5 | 32103039 | 32103111 | Zm10 | 148374671 | 148374743 | 73  | 73  |
| Sb5 | 29053376 | 29053455 | Zm2  | 4148543   | 4148622   | 80  | 80  |
| Sb5 | 29053507 | 29053664 | Zm2  | 4148676   | 4148829   | 158 | 154 |
| Sb5 | 31915955 | 31916535 | Zm2  | 117946047 | 117946627 | 581 | 581 |
| Sb5 | 31916633 | 31916763 | Zm2  | 117949736 | 117949861 | 131 | 126 |
| Sb5 | 31941136 | 31941465 | Zm2  | 117978605 | 117978937 | 330 | 333 |
| Sb5 | 31946634 | 31946856 | Zm2  | 117986095 | 117986317 | 223 | 223 |
| Sb5 | 31946858 | 31946898 | Zm2  | 117986480 | 117986517 | 41  | 38  |
| Sb5 | 31946919 | 31947032 | Zm2  | 117986675 | 117986787 | 114 | 113 |
| Sb5 | 31952188 | 31952346 | Zm2  | 117986846 | 117987004 | 159 | 159 |
| Sb5 | 31952909 | 31952989 | Zm2  | 117987177 | 117987255 | 81  | 79  |
| Sb5 | 31953072 | 31953200 | Zm2  | 117987367 | 117987461 | 129 | 95  |
| Sb5 | 31953421 | 31953715 | Zm2  | 117987783 | 117988090 | 295 | 308 |
| Sb5 | 31953759 | 31953826 | Zm2  | 117988105 | 117988172 | 68  | 68  |
| Sb5 | 31953852 | 31954530 | Zm2  | 117988173 | 117988856 | 679 | 684 |
| Sb5 | 31954582 | 31954653 | Zm2  | 117988857 | 117988928 | 72  | 72  |

|     |          |          |     |           |           |      |      |
|-----|----------|----------|-----|-----------|-----------|------|------|
| Sb5 | 31954709 | 31954843 | Zm2 | 117989825 | 117989959 | 135  | 135  |
| Sb5 | 31955092 | 31955322 | Zm2 | 117989972 | 117990203 | 231  | 232  |
| Sb5 | 31955387 | 31955493 | Zm2 | 117990506 | 117990612 | 107  | 107  |
| Sb5 | 31955544 | 31955949 | Zm2 | 117990663 | 117991095 | 406  | 433  |
| Sb5 | 31957887 | 31958449 | Zm2 | 117991127 | 117991683 | 563  | 557  |
| Sb5 | 25818464 | 25818524 | Zm2 | 118665517 | 118665576 | 61   | 60   |
| Sb5 | 25893237 | 25893334 | Zm2 | 118707130 | 118707227 | 98   | 98   |
| Sb5 | 25894439 | 25894535 | Zm2 | 118707222 | 118707316 | 97   | 95   |
| Sb5 | 25894676 | 25894733 | Zm2 | 118707464 | 118707521 | 58   | 58   |
| Sb5 | 25897226 | 25897327 | Zm2 | 118766612 | 118766708 | 102  | 97   |
| Sb5 | 25897450 | 25897479 | Zm2 | 118766796 | 118766825 | 30   | 30   |
| Sb5 | 25897559 | 25898696 | Zm2 | 118766905 | 118767967 | 1138 | 1063 |
| Sb5 | 25899035 | 25900025 | Zm2 | 118768234 | 118769254 | 991  | 1021 |
| Sb5 | 25900075 | 25900138 | Zm2 | 118769275 | 118769338 | 64   | 64   |
| Sb5 | 25901494 | 25901554 | Zm2 | 118769553 | 118769613 | 61   | 61   |
| Sb5 | 27253368 | 27253478 | Zm2 | 119097308 | 119097343 | 111  | 36   |
| Sb5 | 27253865 | 27253907 | Zm2 | 119097679 | 119097720 | 43   | 42   |
| Sb5 | 27355108 | 27355414 | Zm2 | 119414773 | 119415076 | 307  | 304  |
| Sb5 | 27355849 | 27355936 | Zm2 | 119415673 | 119415760 | 88   | 88   |
| Sb5 | 27358432 | 27358616 | Zm2 | 119421976 | 119422156 | 185  | 181  |
| Sb5 | 27359190 | 27359299 | Zm2 | 119422201 | 119422315 | 110  | 115  |
| Sb5 | 27359430 | 27359544 | Zm2 | 119422400 | 119422514 | 115  | 115  |
| Sb5 | 27372186 | 27372612 | Zm2 | 119434051 | 119434488 | 427  | 438  |
| Sb5 | 27383392 | 27383485 | Zm2 | 119439632 | 119439727 | 94   | 96   |
| Sb5 | 27982641 | 27982886 | Zm2 | 119770101 | 119770353 | 246  | 253  |
| Sb5 | 27982956 | 27983373 | Zm2 | 119770423 | 119770832 | 418  | 410  |

|     |          |          |     |           |           |      |      |
|-----|----------|----------|-----|-----------|-----------|------|------|
| Sb5 | 27983862 | 27984688 | Zm2 | 119793380 | 119794205 | 827  | 826  |
| Sb5 | 27984753 | 27985666 | Zm2 | 119794266 | 119795178 | 914  | 913  |
| Sb5 | 28916384 | 28916686 | Zm2 | 120107380 | 120107662 | 303  | 283  |
| Sb5 | 28916156 | 28916343 | Zm2 | 120107678 | 120107862 | 188  | 185  |
| Sb5 | 28915744 | 28916087 | Zm2 | 120107930 | 120108273 | 344  | 344  |
| Sb5 | 28914682 | 28915456 | Zm2 | 120111103 | 120111886 | 775  | 784  |
| Sb5 | 28914531 | 28914677 | Zm2 | 120111940 | 120112094 | 147  | 155  |
| Sb5 | 28914349 | 28914474 | Zm2 | 120112137 | 120112259 | 126  | 123  |
| Sb5 | 28912522 | 28914064 | Zm2 | 120112611 | 120114149 | 1543 | 1539 |
| Sb5 | 28912287 | 28912328 | Zm2 | 120114339 | 120114380 | 42   | 42   |
| Sb5 | 28912155 | 28912246 | Zm2 | 120114830 | 120114921 | 92   | 92   |
| Sb5 | 28911238 | 28911550 | Zm2 | 120114920 | 120115232 | 313  | 313  |
| Sb5 | 28909857 | 28910652 | Zm2 | 120126261 | 120127082 | 796  | 822  |
| Sb5 | 28908971 | 28909823 | Zm2 | 120127095 | 120127954 | 853  | 860  |
| Sb5 | 28907779 | 28908961 | Zm2 | 120141135 | 120142314 | 1183 | 1180 |
| Sb5 | 28907554 | 28907769 | Zm2 | 120142432 | 120142651 | 216  | 220  |
| Sb5 | 28905952 | 28906444 | Zm2 | 120142932 | 120143418 | 493  | 487  |
| Sb5 | 34613495 | 34613551 | Zm2 | 121255146 | 121255181 | 57   | 36   |
| Sb5 | 34612841 | 34612908 | Zm2 | 121275616 | 121275678 | 68   | 63   |
| Sb5 | 34611501 | 34611561 | Zm2 | 121281447 | 121281505 | 61   | 59   |
| Sb5 | 34606098 | 34606189 | Zm2 | 121290828 | 121290919 | 92   | 92   |
| Sb5 | 34605959 | 34606000 | Zm2 | 121291238 | 121291278 | 42   | 41   |
| Sb5 | 34605441 | 34605510 | Zm2 | 121291452 | 121291521 | 70   | 70   |
| Sb5 | 35073454 | 35073679 | Zm2 | 125291370 | 125291599 | 226  | 230  |
| Sb5 | 22885391 | 22885487 | Zm2 | 144254155 | 144254252 | 97   | 98   |
| Sb5 | 23412869 | 23412981 | Zm2 | 223368295 | 223368407 | 113  | 113  |

|     |          |          |     |           |           |     |     |
|-----|----------|----------|-----|-----------|-----------|-----|-----|
| Sb5 | 23536884 | 23536996 | Zm2 | 223368295 | 223368407 | 113 | 113 |
| Sb5 | 31975796 | 31975951 | Zm3 | 108215113 | 108215268 | 156 | 156 |
| Sb5 | 31975230 | 31975528 | Zm3 | 108218726 | 108219024 | 299 | 299 |
| Sb5 | 25966599 | 25966706 | Zm3 | 163409151 | 163409255 | 108 | 105 |
| Sb5 | 30637791 | 30637904 | Zm3 | 174545869 | 174545982 | 114 | 114 |
| Sb5 | 33737281 | 33737384 | Zm3 | 228843399 | 228843481 | 104 | 83  |
| Sb5 | 34619197 | 34619286 | Zm5 | 15661143  | 15661233  | 90  | 91  |
| Sb5 | 33559749 | 33559824 | Zm5 | 73310617  | 73310692  | 76  | 76  |
| Sb5 | 31025385 | 31025441 | Zm5 | 100466344 | 100466400 | 57  | 57  |
| Sb5 | 25574661 | 25575253 | Zm5 | 204194000 | 204194607 | 593 | 608 |
| Sb5 | 25575336 | 25575423 | Zm5 | 204194699 | 204194786 | 88  | 88  |
| Sb5 | 31956386 | 31956442 | Zm5 | 210997820 | 210997876 | 57  | 57  |
| Sb5 | 33366079 | 33366180 | Zm5 | 216083994 | 216084095 | 102 | 102 |
| Sb5 | 24827842 | 24828008 | Zm6 | 15681295  | 15681461  | 167 | 167 |
| Sb5 | 24829190 | 24829356 | Zm6 | 15681295  | 15681461  | 167 | 167 |
| Sb5 | 32202929 | 32202989 | Zm6 | 42217417  | 42217477  | 61  | 61  |
| Sb5 | 25027166 | 25027219 | Zm6 | 43334365  | 43334418  | 54  | 54  |
| Sb5 | 24132619 | 24132706 | Zm6 | 59099675  | 59099762  | 88  | 88  |
| Sb5 | 25503178 | 25503336 | Zm6 | 114030372 | 114030527 | 159 | 156 |
| Sb5 | 22880398 | 22880474 | Zm8 | 16287193  | 16287270  | 77  | 78  |
| Sb5 | 22860259 | 22860598 | Zm8 | 16374607  | 16374649  | 340 | 43  |
| Sb5 | 22879580 | 22879660 | Zm8 | 16376276  | 16376356  | 81  | 81  |
| Sb5 | 22882419 | 22882559 | Zm8 | 16377895  | 16378036  | 141 | 142 |
| Sb5 | 27856597 | 27856726 | Zm8 | 96277918  | 96278047  | 130 | 130 |
| Sb5 | 27856775 | 27856874 | Zm8 | 96278103  | 96278178  | 100 | 76  |
| Sb5 | 24374127 | 24374245 | Zm8 | 116343229 | 116343343 | 119 | 115 |

|     |          |          |     |           |           |      |      |
|-----|----------|----------|-----|-----------|-----------|------|------|
| Sb5 | 31878610 | 31878654 | Zm8 | 116784452 | 116784496 | 45   | 45   |
| Sb5 | 28394175 | 28394261 | Zm8 | 119360670 | 119360756 | 87   | 87   |
| Sb5 | 28394443 | 28394538 | Zm8 | 119361938 | 119362033 | 96   | 96   |
| Sb5 | 23251642 | 23251761 | Zm8 | 119891429 | 119891526 | 120  | 98   |
| Sb5 | 23210357 | 23210764 | Zm9 | 19851819  | 19852233  | 408  | 415  |
| Sb5 | 23210243 | 23210353 | Zm9 | 19852324  | 19852434  | 111  | 111  |
| Sb5 | 31974833 | 31975074 | Zm9 | 73483370  | 73483609  | 242  | 240  |
| Sb5 | 33574674 | 33574733 | Zm9 | 133091925 | 133091984 | 60   | 60   |
| Sb5 | 27062632 | 27062779 | Zm4 | 16957628  | 16957787  | 148  | 160  |
| Sb5 | 27062483 | 27062563 | Zm4 | 16957912  | 16957995  | 81   | 84   |
| Sb5 | 27057961 | 27059821 | Zm4 | 16959929  | 16961852  | 1861 | 1924 |
| Sb5 | 26834686 | 26834816 | Zm4 | 17134328  | 17134458  | 131  | 131  |
| Sb5 | 26835004 | 26835416 | Zm4 | 17134616  | 17135031  | 413  | 416  |
| Sb5 | 26835650 | 26835721 | Zm4 | 17136265  | 17136335  | 72   | 71   |
| Sb5 | 25949770 | 25950010 | Zm4 | 17179237  | 17179462  | 241  | 226  |
| Sb5 | 25950201 | 25950310 | Zm4 | 17179657  | 17179762  | 110  | 106  |
| Sb5 | 25950337 | 25950551 | Zm4 | 17179827  | 17180040  | 215  | 214  |
| Sb5 | 25967608 | 25967674 | Zm4 | 17186691  | 17186757  | 67   | 67   |
| Sb5 | 22139899 | 22139964 | Zm4 | 19048503  | 19048570  | 66   | 68   |
| Sb5 | 24893846 | 24894028 | Zm4 | 19191958  | 19192147  | 183  | 190  |
| Sb5 | 24894073 | 24896027 | Zm4 | 19192293  | 19194250  | 1955 | 1958 |
| Sb5 | 24896106 | 24896592 | Zm4 | 19194329  | 19194821  | 487  | 493  |
| Sb5 | 34621033 | 34621100 | Zm4 | 19290017  | 19290078  | 68   | 62   |
| Sb5 | 34609743 | 34609873 | Zm4 | 19296410  | 19296546  | 131  | 137  |
| Sb5 | 34608072 | 34608206 | Zm4 | 19296561  | 19296693  | 135  | 133  |
| Sb5 | 34607993 | 34608067 | Zm4 | 19296732  | 19296806  | 75   | 75   |

|     |          |          |     |          |          |     |     |
|-----|----------|----------|-----|----------|----------|-----|-----|
| Sb5 | 34607848 | 34607938 | Zm4 | 19296851 | 19296941 | 91  | 91  |
| Sb5 | 34606270 | 34606332 | Zm4 | 19299159 | 19299208 | 63  | 50  |
| Sb5 | 34605906 | 34605951 | Zm4 | 19300569 | 19300599 | 46  | 31  |
| Sb5 | 34603847 | 34603898 | Zm4 | 19302942 | 19302990 | 52  | 49  |
| Sb5 | 34603258 | 34603292 | Zm4 | 19303531 | 19303564 | 35  | 34  |
| Sb5 | 34603121 | 34603180 | Zm4 | 19303637 | 19303696 | 60  | 60  |
| Sb5 | 33757825 | 33758007 | Zm4 | 19455562 | 19455737 | 183 | 176 |
| Sb5 | 33757480 | 33757764 | Zm4 | 19455798 | 19456082 | 285 | 285 |
| Sb5 | 33749682 | 33749754 | Zm4 | 19456877 | 19456924 | 73  | 48  |
| Sb5 | 33748976 | 33749062 | Zm4 | 19460165 | 19460250 | 87  | 86  |
| Sb5 | 33748748 | 33748857 | Zm4 | 19460463 | 19460572 | 110 | 110 |
| Sb5 | 33738024 | 33738188 | Zm4 | 19460714 | 19460885 | 165 | 172 |
| Sb5 | 33737669 | 33737866 | Zm4 | 19461041 | 19461243 | 198 | 203 |
| Sb5 | 33737386 | 33737456 | Zm4 | 19461458 | 19461527 | 71  | 70  |
| Sb5 | 33735761 | 33736195 | Zm4 | 19462641 | 19463068 | 435 | 428 |
| Sb5 | 33570859 | 33571406 | Zm4 | 19466287 | 19466827 | 548 | 541 |
| Sb5 | 33570549 | 33570644 | Zm4 | 19475668 | 19475763 | 96  | 96  |
| Sb5 | 33569797 | 33570081 | Zm4 | 19476119 | 19476412 | 285 | 294 |
| Sb5 | 33565051 | 33565383 | Zm4 | 19476947 | 19477280 | 333 | 334 |
| Sb5 | 33564986 | 33565028 | Zm4 | 19481549 | 19481591 | 43  | 43  |
| Sb5 | 33564581 | 33564891 | Zm4 | 19481728 | 19481991 | 311 | 264 |
| Sb5 | 33564391 | 33564477 | Zm4 | 19482028 | 19482114 | 87  | 87  |
| Sb5 | 33563530 | 33564324 | Zm4 | 19482357 | 19483143 | 795 | 787 |
| Sb5 | 33563263 | 33563453 | Zm4 | 19483299 | 19483489 | 191 | 191 |
| Sb5 | 33563074 | 33563134 | Zm4 | 19484370 | 19484430 | 61  | 61  |
| Sb5 | 33562932 | 33563021 | Zm4 | 19484621 | 19484710 | 90  | 90  |



|     |          |          |     |          |          |      |     |
|-----|----------|----------|-----|----------|----------|------|-----|
| Sb5 | 33562287 | 33562431 | Zm4 | 19485268 | 19485400 | 145  | 133 |
| Sb5 | 33561996 | 33562061 | Zm4 | 19485647 | 19485712 | 66   | 66  |
| Sb5 | 33561828 | 33561874 | Zm4 | 19485866 | 19485912 | 47   | 47  |
| Sb5 | 29037327 | 29037382 | Zm4 | 19777138 | 19777194 | 56   | 57  |
| Sb5 | 32017447 | 32018322 | Zm4 | 19808911 | 19809777 | 876  | 867 |
| Sb5 | 27798311 | 27798631 | Zm4 | 19918441 | 19918773 | 321  | 333 |
| Sb5 | 27797701 | 27797979 | Zm4 | 19919021 | 19919301 | 279  | 281 |
| Sb5 | 27796185 | 27796324 | Zm4 | 19964295 | 19964431 | 140  | 137 |
| Sb5 | 27794259 | 27794988 | Zm4 | 19964645 | 19965388 | 730  | 744 |
| Sb5 | 27793837 | 27794216 | Zm4 | 19965401 | 19965782 | 380  | 382 |
| Sb5 | 27791303 | 27792033 | Zm4 | 19967844 | 19968578 | 731  | 735 |
| Sb5 | 27708691 | 27708756 | Zm4 | 20040734 | 20040799 | 66   | 66  |
| Sb5 | 27384920 | 27385066 | Zm4 | 20043405 | 20043551 | 147  | 147 |
| Sb5 | 27383888 | 27383980 | Zm4 | 20044029 | 20044121 | 93   | 93  |
| Sb5 | 27381834 | 27381906 | Zm4 | 20045517 | 20045586 | 73   | 70  |
| Sb5 | 27381120 | 27381233 | Zm4 | 20046413 | 20046527 | 114  | 115 |
| Sb5 | 27380610 | 27380750 | Zm4 | 20046516 | 20046650 | 141  | 135 |
| Sb5 | 27373984 | 27374019 | Zm4 | 20048711 | 20048746 | 36   | 36  |
| Sb5 | 27373459 | 27373535 | Zm4 | 20049384 | 20049451 | 77   | 68  |
| Sb5 | 27358112 | 27358163 | Zm4 | 20060062 | 20060112 | 52   | 51  |
| Sb5 | 27354322 | 27354357 | Zm4 | 20065443 | 20065476 | 36   | 34  |
| Sb5 | 27231225 | 27231295 | Zm4 | 20270146 | 20270217 | 71   | 72  |
| Sb5 | 27210630 | 27211129 | Zm4 | 20270672 | 20271171 | 500  | 500 |
| Sb5 | 27168955 | 27169965 | Zm4 | 20271795 | 20272792 | 1011 | 998 |
| Sb5 | 27168544 | 27168826 | Zm4 | 20273183 | 20273464 | 283  | 282 |
| Sb5 | 27168113 | 27168217 | Zm4 | 20274752 | 20274857 | 105  | 106 |

|     |          |          |     |           |           |     |     |
|-----|----------|----------|-----|-----------|-----------|-----|-----|
| Sb5 | 27166729 | 27166937 | Zm4 | 20275387  | 20275595  | 209 | 209 |
| Sb5 | 25813355 | 25813706 | Zm4 | 20370559  | 20370899  | 352 | 341 |
| Sb5 | 25815726 | 25815810 | Zm4 | 20372160  | 20372232  | 85  | 73  |
| Sb5 | 25818946 | 25819078 | Zm4 | 20373484  | 20373609  | 133 | 126 |
| Sb5 | 26326768 | 26326932 | Zm4 | 20408317  | 20408397  | 165 | 81  |
| Sb5 | 26327107 | 26327173 | Zm4 | 20408641  | 20408709  | 67  | 69  |
| Sb5 | 26327406 | 26327566 | Zm4 | 20408981  | 20409139  | 161 | 159 |
| Sb5 | 26328610 | 26328751 | Zm4 | 20413351  | 20413492  | 142 | 142 |
| Sb5 | 26329262 | 26329384 | Zm4 | 20414060  | 20414176  | 123 | 117 |
| Sb5 | 31745335 | 31745623 | Zm4 | 20637112  | 20637327  | 289 | 216 |
| Sb5 | 31744894 | 31745129 | Zm4 | 20637677  | 20637864  | 236 | 188 |
| Sb5 | 31744702 | 31744772 | Zm4 | 20638102  | 20638168  | 71  | 67  |
| Sb5 | 31741203 | 31741246 | Zm4 | 20641030  | 20641073  | 44  | 44  |
| Sb5 | 31740901 | 31740989 | Zm4 | 20641312  | 20641400  | 89  | 89  |
| Sb5 | 31010013 | 31010089 | Zm4 | 20911869  | 20911944  | 77  | 76  |
| Sb5 | 30674140 | 30674214 | Zm4 | 21022640  | 21022714  | 75  | 75  |
| Sb5 | 30674295 | 30674958 | Zm4 | 21022797  | 21023454  | 664 | 658 |
| Sb5 | 30675242 | 30675315 | Zm4 | 21023781  | 21023854  | 74  | 74  |
| Sb5 | 30676851 | 30676898 | Zm4 | 21025478  | 21025524  | 48  | 47  |
| Sb5 | 30681926 | 30681978 | Zm4 | 80139249  | 80139299  | 53  | 51  |
| Sb5 | 29077766 | 29077891 | Zm4 | 86088109  | 86088234  | 126 | 126 |
| Sb5 | 25809450 | 25809500 | Zm4 | 127402415 | 127402465 | 51  | 51  |
| Sb5 | 32202382 | 32202519 | Zm4 | 230880275 | 230880412 | 138 | 138 |
| Sb6 | 11201138 | 11201317 | Zm1 | 22534484  | 22534673  | 180 | 190 |
| Sb6 | 26775492 | 26775526 | Zm1 | 32204057  | 32204087  | 35  | 31  |
| Sb6 | 27702509 | 27702553 | Zm1 | 69426446  | 69426490  | 45  | 45  |

|     |          |          |      |           |           |     |     |
|-----|----------|----------|------|-----------|-----------|-----|-----|
| Sb6 | 25944242 | 25944378 | Zm1  | 74011188  | 74011320  | 137 | 133 |
| Sb6 | 16608338 | 16608388 | Zm1  | 165266665 | 165266715 | 51  | 51  |
| Sb6 | 26374115 | 26374360 | Zm1  | 193123224 | 193123469 | 246 | 246 |
| Sb6 | 11187752 | 11187982 | Zm1  | 211040824 | 211041051 | 231 | 228 |
| Sb6 | 11188074 | 11188230 | Zm1  | 211040878 | 211041026 | 157 | 149 |
| Sb6 | 12427555 | 12428142 | Zm1  | 218869709 | 218870304 | 588 | 596 |
| Sb6 | 15964406 | 15964458 | Zm1  | 251806305 | 251806357 | 53  | 53  |
| Sb6 | 8613162  | 8613220  | Zm1  | 286674248 | 286674295 | 59  | 48  |
| Sb6 | 8680997  | 8681055  | Zm1  | 286674248 | 286674295 | 59  | 48  |
| Sb6 | 27708377 | 27708493 | Zm1  | 290325455 | 290325571 | 117 | 117 |
| Sb6 | 19141706 | 19141877 | Zm1  | 291289505 | 291289672 | 172 | 168 |
| Sb6 | 19142077 | 19142171 | Zm1  | 291289922 | 291290012 | 95  | 91  |
| Sb6 | 8681897  | 8682001  | Zm10 | 9947639   | 9947741   | 105 | 103 |
| Sb6 | 8614084  | 8614188  | Zm10 | 9947639   | 9947741   | 105 | 103 |
| Sb6 | 10650518 | 10650588 | Zm10 | 22986099  | 22986143  | 71  | 45  |
| Sb6 | 11325821 | 11325893 | Zm10 | 81450807  | 81450879  | 73  | 73  |
| Sb6 | 8131866  | 8131997  | Zm10 | 102558315 | 102558443 | 132 | 129 |
| Sb6 | 8133759  | 8133821  | Zm10 | 102586693 | 102586756 | 63  | 64  |
| Sb6 | 8187502  | 8187562  | Zm10 | 102679038 | 102679097 | 61  | 60  |
| Sb6 | 8959744  | 8959814  | Zm10 | 103100975 | 103101034 | 71  | 60  |
| Sb6 | 12158104 | 12158160 | Zm10 | 103118342 | 103118397 | 57  | 56  |
| Sb6 | 12157752 | 12157992 | Zm10 | 103118529 | 103118768 | 241 | 240 |
| Sb6 | 12157495 | 12157685 | Zm10 | 103118827 | 103119020 | 191 | 194 |
| Sb6 | 11816590 | 11816687 | Zm10 | 103237331 | 103237402 | 98  | 72  |
| Sb6 | 9784963  | 9785007  | Zm10 | 103310920 | 103310964 | 45  | 45  |
| Sb6 | 9783770  | 9783855  | Zm10 | 103312034 | 103312089 | 86  | 56  |

|     |          |          |      |           |           |     |     |
|-----|----------|----------|------|-----------|-----------|-----|-----|
| Sb6 | 9780605  | 9780813  | Zm10 | 103321070 | 103321274 | 209 | 205 |
| Sb6 | 9780053  | 9780086  | Zm10 | 103323065 | 103323098 | 34  | 34  |
| Sb6 | 9681279  | 9681395  | Zm10 | 103484738 | 103484854 | 117 | 117 |
| Sb6 | 9680916  | 9681188  | Zm10 | 103484922 | 103485197 | 273 | 276 |
| Sb6 | 9680728  | 9680803  | Zm10 | 103485310 | 103485385 | 76  | 76  |
| Sb6 | 9679440  | 9679565  | Zm10 | 103485728 | 103485853 | 126 | 126 |
| Sb6 | 9678707  | 9678747  | Zm10 | 103486555 | 103486595 | 41  | 41  |
| Sb6 | 25935967 | 25936065 | Zm10 | 104032736 | 104032819 | 99  | 84  |
| Sb6 | 25936191 | 25936302 | Zm10 | 104033032 | 104033141 | 112 | 110 |
| Sb6 | 25936356 | 25936655 | Zm10 | 104033317 | 104033606 | 300 | 290 |
| Sb6 | 25938495 | 25938544 | Zm10 | 104035321 | 104035369 | 50  | 49  |
| Sb6 | 25943936 | 25944221 | Zm10 | 104035369 | 104035645 | 286 | 277 |
| Sb6 | 26676166 | 26676321 | Zm10 | 104108958 | 104109110 | 156 | 153 |
| Sb6 | 26676510 | 26676563 | Zm10 | 104118309 | 104118362 | 54  | 54  |
| Sb6 | 26677313 | 26677664 | Zm10 | 104119087 | 104119423 | 352 | 337 |
| Sb6 | 26677673 | 26677746 | Zm10 | 104119470 | 104119543 | 74  | 74  |
| Sb6 | 26677856 | 26678305 | Zm10 | 104120472 | 104120935 | 450 | 464 |
| Sb6 | 26678339 | 26678562 | Zm10 | 104121108 | 104121326 | 224 | 219 |
| Sb6 | 15950797 | 15950863 | Zm10 | 104478041 | 104478107 | 67  | 67  |
| Sb6 | 15950916 | 15951165 | Zm10 | 104478191 | 104478440 | 250 | 250 |
| Sb6 | 15951917 | 15951988 | Zm10 | 104486448 | 104486509 | 72  | 62  |
| Sb6 | 15952126 | 15952180 | Zm10 | 104486670 | 104486711 | 55  | 42  |
| Sb6 | 15952446 | 15952550 | Zm10 | 104486968 | 104487071 | 105 | 104 |
| Sb6 | 15952552 | 15952737 | Zm10 | 104487100 | 104487294 | 186 | 195 |
| Sb6 | 15962641 | 15962835 | Zm10 | 104487297 | 104487492 | 195 | 196 |
| Sb6 | 15962855 | 15963009 | Zm10 | 104487540 | 104487693 | 155 | 154 |

|     |          |          |      |           |           |      |      |
|-----|----------|----------|------|-----------|-----------|------|------|
| Sb6 | 14526919 | 14528129 | Zm10 | 104677099 | 104678331 | 1211 | 1233 |
| Sb6 | 14526787 | 14526885 | Zm10 | 104680170 | 104680268 | 99   | 99   |
| Sb6 | 14525655 | 14525851 | Zm10 | 104681118 | 104681314 | 197  | 197  |
| Sb6 | 14525081 | 14525317 | Zm10 | 104681628 | 104681864 | 237  | 237  |
| Sb6 | 14524528 | 14525001 | Zm10 | 104688862 | 104689354 | 474  | 493  |
| Sb6 | 14524395 | 14524520 | Zm10 | 104691023 | 104691149 | 126  | 127  |
| Sb6 | 14518829 | 14518962 | Zm10 | 104691158 | 104691290 | 134  | 133  |
| Sb6 | 14518291 | 14518667 | Zm10 | 104691331 | 104691709 | 377  | 379  |
| Sb6 | 14512431 | 14513248 | Zm10 | 104696970 | 104697788 | 818  | 819  |
| Sb6 | 14510704 | 14511127 | Zm10 | 104697915 | 104698346 | 424  | 432  |
| Sb6 | 14510566 | 14510668 | Zm10 | 104698494 | 104698597 | 103  | 104  |
| Sb6 | 14509885 | 14510208 | Zm10 | 104705423 | 104705744 | 324  | 322  |
| Sb6 | 14509201 | 14509878 | Zm10 | 104705878 | 104706551 | 678  | 674  |
| Sb6 | 14509071 | 14509167 | Zm10 | 104707365 | 104707455 | 97   | 91   |
| Sb6 | 14508907 | 14509034 | Zm10 | 104711332 | 104711459 | 128  | 128  |
| Sb6 | 14508778 | 14508899 | Zm10 | 104714797 | 104714918 | 122  | 122  |
| Sb6 | 14501395 | 14501542 | Zm10 | 104716476 | 104716621 | 148  | 146  |
| Sb6 | 14501249 | 14501381 | Zm10 | 104716657 | 104716789 | 133  | 133  |
| Sb6 | 14501133 | 14501244 | Zm10 | 104734642 | 104734755 | 112  | 114  |
| Sb6 | 14500696 | 14501014 | Zm10 | 104735028 | 104735340 | 319  | 313  |
| Sb6 | 14500437 | 14500683 | Zm10 | 104735383 | 104735627 | 247  | 245  |
| Sb6 | 14496552 | 14496696 | Zm10 | 104736498 | 104736639 | 145  | 142  |
| Sb6 | 14489492 | 14489917 | Zm10 | 104750072 | 104750511 | 426  | 440  |
| Sb6 | 14489315 | 14489453 | Zm10 | 104750559 | 104750692 | 139  | 134  |
| Sb6 | 14480826 | 14481168 | Zm10 | 104754602 | 104754940 | 343  | 339  |
| Sb6 | 14480154 | 14480766 | Zm10 | 104755008 | 104755603 | 613  | 596  |

|     |          |          |      |           |           |      |      |
|-----|----------|----------|------|-----------|-----------|------|------|
| Sb6 | 14474972 | 14475180 | Zm10 | 104755629 | 104755834 | 209  | 206  |
| Sb6 | 14467668 | 14468419 | Zm10 | 104756695 | 104757436 | 752  | 742  |
| Sb6 | 14110232 | 14110571 | Zm10 | 104895009 | 104895344 | 340  | 336  |
| Sb6 | 9056915  | 9057071  | Zm10 | 104900235 | 104900390 | 157  | 156  |
| Sb6 | 9057149  | 9057723  | Zm10 | 104900482 | 104901067 | 575  | 586  |
| Sb6 | 9064300  | 9064785  | Zm10 | 104903404 | 104903893 | 486  | 490  |
| Sb6 | 9064936  | 9065873  | Zm10 | 104904047 | 104904995 | 938  | 949  |
| Sb6 | 9066031  | 9066095  | Zm10 | 104905260 | 104905324 | 65   | 65   |
| Sb6 | 9066111  | 9067545  | Zm10 | 104905641 | 104907077 | 1435 | 1437 |
| Sb6 | 9067581  | 9068667  | Zm10 | 104907777 | 104908853 | 1087 | 1077 |
| Sb6 | 9068913  | 9069027  | Zm10 | 104908966 | 104909078 | 115  | 113  |
| Sb6 | 9069132  | 9069256  | Zm10 | 104909195 | 104909321 | 125  | 127  |
| Sb6 | 17414342 | 17414406 | Zm10 | 104955755 | 104955819 | 65   | 65   |
| Sb6 | 17415373 | 17415457 | Zm10 | 104955826 | 104955899 | 85   | 74   |
| Sb6 | 17417893 | 17417984 | Zm10 | 104978580 | 104978635 | 92   | 56   |
| Sb6 | 10588228 | 10588323 | Zm10 | 105068357 | 105068452 | 96   | 96   |
| Sb6 | 10587226 | 10588167 | Zm10 | 105068499 | 105069443 | 942  | 945  |
| Sb6 | 10585941 | 10587197 | Zm10 | 105071984 | 105073240 | 1257 | 1257 |
| Sb6 | 10579164 | 10580658 | Zm10 | 105073260 | 105074749 | 1495 | 1490 |
| Sb6 | 10572694 | 10572899 | Zm10 | 105074775 | 105074983 | 206  | 209  |
| Sb6 | 10571975 | 10572639 | Zm10 | 105075084 | 105075743 | 665  | 660  |
| Sb6 | 10571356 | 10571723 | Zm10 | 105075740 | 105076107 | 368  | 368  |
| Sb6 | 10570279 | 10570917 | Zm10 | 105083463 | 105084077 | 639  | 615  |
| Sb6 | 10569660 | 10570238 | Zm10 | 105084322 | 105084914 | 579  | 593  |
| Sb6 | 10564530 | 10565011 | Zm10 | 105089374 | 105089856 | 482  | 483  |
| Sb6 | 10564194 | 10564518 | Zm10 | 105090034 | 105090278 | 325  | 245  |

|     |          |          |      |           |           |      |      |
|-----|----------|----------|------|-----------|-----------|------|------|
| Sb6 | 10563889 | 10564128 | Zm10 | 105090288 | 105090527 | 240  | 240  |
| Sb6 | 10563388 | 10563471 | Zm10 | 105090612 | 105090695 | 84   | 84   |
| Sb6 | 10559873 | 10559966 | Zm10 | 105090692 | 105090785 | 94   | 94   |
| Sb6 | 10559310 | 10559826 | Zm10 | 105090882 | 105091381 | 517  | 500  |
| Sb6 | 10551936 | 10552046 | Zm10 | 105093978 | 105094090 | 111  | 113  |
| Sb6 | 10551599 | 10551849 | Zm10 | 105094548 | 105094806 | 251  | 259  |
| Sb6 | 10547737 | 10550075 | Zm10 | 105094918 | 105097250 | 2339 | 2333 |
| Sb6 | 18891056 | 18891103 | Zm10 | 105720546 | 105720593 | 48   | 48   |
| Sb6 | 10908111 | 10908227 | Zm10 | 105780524 | 105780630 | 117  | 107  |
| Sb6 | 10908517 | 10908554 | Zm10 | 105781054 | 105781088 | 38   | 35   |
| Sb6 | 10908651 | 10908975 | Zm10 | 105781320 | 105781642 | 325  | 323  |
| Sb6 | 10909081 | 10910006 | Zm10 | 105781808 | 105782719 | 926  | 912  |
| Sb6 | 10910284 | 10911155 | Zm10 | 105783084 | 105783942 | 872  | 859  |
| Sb6 | 10911231 | 10912019 | Zm10 | 105784628 | 105785397 | 789  | 770  |
| Sb6 | 25553623 | 25554263 | Zm10 | 105924491 | 105925118 | 641  | 628  |
| Sb6 | 25553489 | 25553549 | Zm10 | 105925193 | 105925253 | 61   | 61   |
| Sb6 | 25550186 | 25550426 | Zm10 | 105926689 | 105926943 | 241  | 255  |
| Sb6 | 25549897 | 25550130 | Zm10 | 105926954 | 105927186 | 234  | 233  |
| Sb6 | 25549535 | 25549716 | Zm10 | 105929771 | 105929952 | 182  | 182  |
| Sb6 | 25548318 | 25549468 | Zm10 | 105929953 | 105931109 | 1151 | 1157 |
| Sb6 | 25539578 | 25540359 | Zm10 | 105942252 | 105943023 | 782  | 772  |
| Sb6 | 25538968 | 25539055 | Zm10 | 105947134 | 105947221 | 88   | 88   |
| Sb6 | 25538845 | 25538913 | Zm10 | 105950800 | 105950869 | 69   | 70   |
| Sb6 | 25538474 | 25538558 | Zm10 | 105951164 | 105951247 | 85   | 84   |
| Sb6 | 25538191 | 25538451 | Zm10 | 105951392 | 105951634 | 261  | 243  |
| Sb6 | 25537796 | 25538103 | Zm10 | 105951723 | 105952025 | 308  | 303  |

|     |          |          |      |           |           |      |      |
|-----|----------|----------|------|-----------|-----------|------|------|
| Sb6 | 25537640 | 25537715 | Zm10 | 105952106 | 105952183 | 76   | 78   |
| Sb6 | 25534273 | 25534418 | Zm10 | 105952259 | 105952405 | 146  | 147  |
| Sb6 | 25524042 | 25524143 | Zm10 | 105952434 | 105952538 | 102  | 105  |
| Sb6 | 25523722 | 25524023 | Zm10 | 105952707 | 105953017 | 302  | 311  |
| Sb6 | 25523570 | 25523667 | Zm10 | 105953033 | 105953130 | 98   | 98   |
| Sb6 | 25523287 | 25523487 | Zm10 | 105977920 | 105978120 | 201  | 201  |
| Sb6 | 25522081 | 25523282 | Zm10 | 105994086 | 105995278 | 1202 | 1193 |
| Sb6 | 25521676 | 25521823 | Zm10 | 105997850 | 105997997 | 148  | 148  |
| Sb6 | 25521574 | 25521670 | Zm10 | 105998289 | 105998384 | 97   | 96   |
| Sb6 | 25521435 | 25521566 | Zm10 | 105998748 | 105998876 | 132  | 129  |
| Sb6 | 25507174 | 25507272 | Zm10 | 105998894 | 105998990 | 99   | 97   |
| Sb6 | 25506298 | 25506439 | Zm10 | 105999075 | 105999211 | 142  | 137  |
| Sb6 | 25505984 | 25506179 | Zm10 | 105999327 | 105999521 | 196  | 195  |
| Sb6 | 25504676 | 25504787 | Zm10 | 106000353 | 106000473 | 112  | 121  |
| Sb6 | 25504184 | 25504337 | Zm10 | 106000817 | 106000975 | 154  | 159  |
| Sb6 | 25502898 | 25503935 | Zm10 | 106001640 | 106002677 | 1038 | 1038 |
| Sb6 | 25502536 | 25502614 | Zm10 | 106002833 | 106002911 | 79   | 79   |
| Sb6 | 29517007 | 29517490 | Zm10 | 106173054 | 106173529 | 484  | 476  |
| Sb6 | 29517540 | 29518027 | Zm10 | 106173588 | 106174075 | 488  | 488  |
| Sb6 | 29518564 | 29519807 | Zm10 | 106174299 | 106175542 | 1244 | 1244 |
| Sb6 | 29544280 | 29544471 | Zm10 | 106175950 | 106176141 | 192  | 192  |
| Sb6 | 29544842 | 29545396 | Zm10 | 106176502 | 106177029 | 555  | 528  |
| Sb6 | 29572896 | 29572978 | Zm10 | 106177019 | 106177101 | 83   | 83   |
| Sb6 | 26371101 | 26371171 | Zm10 | 106289853 | 106289928 | 71   | 76   |
| Sb6 | 26362286 | 26363020 | Zm10 | 106295567 | 106296301 | 735  | 735  |
| Sb6 | 26361435 | 26361580 | Zm10 | 106296376 | 106296521 | 146  | 146  |



|     |          |          |      |           |           |     |     |
|-----|----------|----------|------|-----------|-----------|-----|-----|
| Sb6 | 26359984 | 26360311 | Zm10 | 106296647 | 106296975 | 328 | 329 |
| Sb6 | 26359722 | 26359776 | Zm10 | 106297296 | 106297350 | 55  | 55  |
| Sb6 | 26359261 | 26359355 | Zm10 | 106297657 | 106297751 | 95  | 95  |
| Sb6 | 23018703 | 23018793 | Zm10 | 109549832 | 109549922 | 91  | 91  |
| Sb6 | 23018994 | 23019063 | Zm10 | 109550432 | 109550503 | 70  | 72  |
| Sb6 | 23018107 | 23018316 | Zm10 | 122834220 | 122834405 | 210 | 186 |
| Sb6 | 28485195 | 28485367 | Zm3  | 3666296   | 3666474   | 173 | 179 |
| Sb6 | 17947535 | 17947626 | Zm3  | 5374129   | 5374220   | 92  | 92  |
| Sb6 | 17947659 | 17947825 | Zm3  | 5374223   | 5374392   | 167 | 170 |
| Sb6 | 17947830 | 17948122 | Zm3  | 5374474   | 5374764   | 293 | 291 |
| Sb6 | 26361853 | 26361938 | Zm3  | 17739853  | 17739938  | 86  | 86  |
| Sb6 | 13591988 | 13592126 | Zm3  | 19141534  | 19141675  | 139 | 142 |
| Sb6 | 13591749 | 13591970 | Zm3  | 19141759  | 19141988  | 222 | 230 |
| Sb6 | 11449265 | 11449401 | Zm3  | 19790806  | 19790942  | 137 | 137 |
| Sb6 | 11377821 | 11377957 | Zm3  | 19790806  | 19790942  | 137 | 137 |
| Sb6 | 9791806  | 9791898  | Zm3  | 28696574  | 28696666  | 93  | 93  |
| Sb6 | 9791932  | 9792065  | Zm3  | 28696736  | 28696865  | 134 | 130 |
| Sb6 | 8857311  | 8857370  | Zm3  | 73138751  | 73138810  | 60  | 60  |
| Sb6 | 27707044 | 27707153 | Zm3  | 152263883 | 152263990 | 110 | 108 |
| Sb6 | 8028416  | 8028538  | Zm3  | 153210190 | 153210312 | 123 | 123 |
| Sb6 | 8027199  | 8027252  | Zm3  | 153210504 | 153210557 | 54  | 54  |
| Sb6 | 8026073  | 8026196  | Zm3  | 153211098 | 153211222 | 124 | 125 |
| Sb6 | 8024790  | 8025581  | Zm3  | 153211616 | 153212341 | 792 | 726 |
| Sb6 | 8022250  | 8022328  | Zm3  | 153218488 | 153218564 | 79  | 77  |
| Sb6 | 8021432  | 8021519  | Zm3  | 153219364 | 153219413 | 88  | 50  |
| Sb6 | 8021354  | 8021407  | Zm3  | 153219450 | 153219503 | 54  | 54  |

|     |         |         |     |           |           |     |     |
|-----|---------|---------|-----|-----------|-----------|-----|-----|
| Sb6 | 8021117 | 8021279 | Zm3 | 153219578 | 153219740 | 163 | 163 |
| Sb6 | 8020636 | 8020811 | Zm3 | 153219921 | 153220096 | 176 | 176 |
| Sb6 | 8020420 | 8020526 | Zm3 | 153220206 | 153220313 | 107 | 108 |
| Sb6 | 8020256 | 8020327 | Zm3 | 153220406 | 153220474 | 72  | 69  |
| Sb6 | 8019567 | 8020058 | Zm3 | 153220675 | 153221162 | 492 | 488 |
| Sb6 | 8019274 | 8019328 | Zm3 | 153226785 | 153226835 | 55  | 51  |
| Sb6 | 8018530 | 8019139 | Zm3 | 153226974 | 153227581 | 610 | 608 |
| Sb6 | 8018335 | 8018441 | Zm3 | 153227652 | 153227759 | 107 | 108 |
| Sb6 | 8017830 | 8017998 | Zm3 | 153233312 | 153233473 | 169 | 162 |
| Sb6 | 8016693 | 8016971 | Zm3 | 153234810 | 153235096 | 279 | 287 |
| Sb6 | 8016291 | 8016614 | Zm3 | 153235104 | 153235409 | 324 | 306 |
| Sb6 | 8015870 | 8016157 | Zm3 | 153235539 | 153235817 | 288 | 279 |
| Sb6 | 8015681 | 8015762 | Zm3 | 153235910 | 153235991 | 82  | 82  |
| Sb6 | 8133552 | 8133643 | Zm3 | 153506887 | 153506978 | 92  | 92  |
| Sb6 | 8134082 | 8134123 | Zm3 | 153507313 | 153507354 | 42  | 42  |
| Sb6 | 8135735 | 8136097 | Zm3 | 153507816 | 153508149 | 363 | 334 |
| Sb6 | 8136329 | 8136474 | Zm3 | 153508400 | 153508547 | 146 | 148 |
| Sb6 | 8187614 | 8187681 | Zm3 | 153641839 | 153641906 | 68  | 68  |
| Sb6 | 8187898 | 8188048 | Zm3 | 153642165 | 153642314 | 151 | 150 |
| Sb6 | 8190636 | 8190717 | Zm3 | 153744882 | 153744963 | 82  | 82  |
| Sb6 | 8192530 | 8192583 | Zm3 | 153747984 | 153748035 | 54  | 52  |
| Sb6 | 8192705 | 8192732 | Zm3 | 153748168 | 153748194 | 28  | 27  |
| Sb6 | 8195549 | 8195591 | Zm3 | 153750877 | 153750917 | 43  | 41  |
| Sb6 | 8196176 | 8196227 | Zm3 | 153751626 | 153751670 | 52  | 45  |
| Sb6 | 8200649 | 8200913 | Zm3 | 153823963 | 153824234 | 265 | 272 |
| Sb6 | 8746264 | 8746341 | Zm3 | 153938200 | 153938280 | 78  | 81  |

|     |          |          |     |           |           |      |      |
|-----|----------|----------|-----|-----------|-----------|------|------|
| Sb6 | 8890912  | 8891167  | Zm3 | 153976569 | 153976818 | 256  | 250  |
| Sb6 | 8890211  | 8890864  | Zm3 | 153976885 | 153977525 | 654  | 641  |
| Sb6 | 8890138  | 8890209  | Zm3 | 153977554 | 153977624 | 72   | 71   |
| Sb6 | 8889607  | 8890038  | Zm3 | 153977694 | 153978096 | 432  | 403  |
| Sb6 | 8888512  | 8889386  | Zm3 | 153978746 | 153979562 | 875  | 817  |
| Sb6 | 8888280  | 8888449  | Zm3 | 153979685 | 153979855 | 170  | 171  |
| Sb6 | 8886651  | 8888246  | Zm3 | 153979888 | 153981477 | 1596 | 1590 |
| Sb6 | 8929763  | 8930085  | Zm3 | 153992351 | 153992670 | 323  | 320  |
| Sb6 | 8900427  | 8900588  | Zm3 | 153994644 | 153994799 | 162  | 156  |
| Sb6 | 8900188  | 8900368  | Zm3 | 153994828 | 153995008 | 181  | 181  |
| Sb6 | 8899703  | 8899988  | Zm3 | 153995211 | 153995493 | 286  | 283  |
| Sb6 | 8956354  | 8956450  | Zm3 | 154095138 | 154095230 | 97   | 93   |
| Sb6 | 8957861  | 8957891  | Zm3 | 154096620 | 154096650 | 31   | 31   |
| Sb6 | 8958022  | 8958128  | Zm3 | 154098157 | 154098263 | 107  | 107  |
| Sb6 | 8958181  | 8958280  | Zm3 | 154098757 | 154098852 | 100  | 96   |
| Sb6 | 8958585  | 8959351  | Zm3 | 154099205 | 154100002 | 767  | 798  |
| Sb6 | 8959936  | 8959987  | Zm3 | 154105164 | 154105215 | 52   | 52   |
| Sb6 | 8961297  | 8961347  | Zm3 | 154108352 | 154108403 | 51   | 52   |
| Sb6 | 8961459  | 8961521  | Zm3 | 154108484 | 154108525 | 63   | 42   |
| Sb6 | 9669631  | 9669805  | Zm3 | 154397997 | 154398170 | 175  | 174  |
| Sb6 | 9670911  | 9671192  | Zm3 | 154398923 | 154399212 | 282  | 290  |
| Sb6 | 9672011  | 9672183  | Zm3 | 154399994 | 154400162 | 173  | 169  |
| Sb6 | 9672349  | 9672867  | Zm3 | 154400364 | 154400871 | 519  | 508  |
| Sb6 | 9672949  | 9673776  | Zm3 | 154400953 | 154401778 | 828  | 826  |
| Sb6 | 17301328 | 17301398 | Zm3 | 165445401 | 165445473 | 71   | 73   |
| Sb6 | 20390872 | 20390949 | Zm3 | 169037541 | 169037618 | 78   | 78   |

|     |          |          |     |           |           |     |     |
|-----|----------|----------|-----|-----------|-----------|-----|-----|
| Sb6 | 18323351 | 18323455 | Zm3 | 203822356 | 203822426 | 105 | 71  |
| Sb6 | 28125877 | 28125980 | Zm3 | 219080087 | 219080187 | 104 | 101 |
| Sb6 | 27709362 | 27709587 | Zm3 | 224507019 | 224507251 | 226 | 233 |
| Sb6 | 16608715 | 16608786 | Zm4 | 14540158  | 14540229  | 72  | 72  |
| Sb6 | 16608553 | 16608628 | Zm4 | 14540317  | 14540380  | 76  | 64  |
| Sb6 | 29535412 | 29535504 | Zm4 | 52957005  | 52957097  | 93  | 93  |
| Sb6 | 15108632 | 15108711 | Zm4 | 74258723  | 74258802  | 80  | 80  |
| Sb6 | 28132967 | 28133105 | Zm4 | 168241651 | 168241789 | 139 | 139 |
| Sb6 | 11441437 | 11441515 | Zm4 | 179050005 | 179050083 | 79  | 79  |
| Sb6 | 11441294 | 11441393 | Zm4 | 179141301 | 179141402 | 100 | 102 |
| Sb6 | 11440965 | 11441248 | Zm4 | 179141440 | 179141721 | 284 | 282 |
| Sb6 | 11440182 | 11440877 | Zm4 | 179141743 | 179142443 | 696 | 701 |
| Sb6 | 11439815 | 11439906 | Zm4 | 179142724 | 179142813 | 92  | 90  |
| Sb6 | 11438579 | 11439378 | Zm4 | 179142820 | 179143614 | 800 | 795 |
| Sb6 | 11428461 | 11428925 | Zm4 | 179157061 | 179157531 | 465 | 471 |
| Sb6 | 11427742 | 11428349 | Zm4 | 179157637 | 179158238 | 608 | 602 |
| Sb6 | 11427038 | 11427732 | Zm4 | 179158425 | 179159122 | 695 | 698 |
| Sb6 | 11425868 | 11426741 | Zm4 | 179159184 | 179160076 | 874 | 893 |
| Sb6 | 11425397 | 11425814 | Zm4 | 179160130 | 179160554 | 418 | 425 |
| Sb6 | 11424756 | 11424808 | Zm4 | 179161143 | 179161194 | 53  | 52  |
| Sb6 | 20685940 | 20685989 | Zm4 | 213039267 | 213039316 | 50  | 50  |
| Sb6 | 15118471 | 15118884 | Zm5 | 25261257  | 25261670  | 414 | 414 |
| Sb6 | 15119039 | 15119621 | Zm5 | 25262371  | 25262937  | 583 | 567 |
| Sb6 | 15119866 | 15120009 | Zm5 | 25262931  | 25263075  | 144 | 145 |
| Sb6 | 15120038 | 15120834 | Zm5 | 25263150  | 25263945  | 797 | 796 |
| Sb6 | 15122029 | 15122399 | Zm5 | 25268128  | 25268499  | 371 | 372 |

|     |          |          |     |           |           |     |     |
|-----|----------|----------|-----|-----------|-----------|-----|-----|
| Sb6 | 15122523 | 15122688 | Zm5 | 25268605  | 25268770  | 166 | 166 |
| Sb6 | 15118313 | 15118441 | Zm5 | 25299830  | 25299958  | 129 | 129 |
| Sb6 | 15117760 | 15118201 | Zm5 | 25299993  | 25300433  | 442 | 441 |
| Sb6 | 15117291 | 15117338 | Zm5 | 25300477  | 25300524  | 48  | 48  |
| Sb6 | 15110417 | 15110728 | Zm5 | 25300556  | 25300839  | 312 | 284 |
| Sb6 | 15109684 | 15110237 | Zm5 | 25300915  | 25301467  | 554 | 553 |
| Sb6 | 15100187 | 15100506 | Zm5 | 25305321  | 25305647  | 320 | 327 |
| Sb6 | 15099680 | 15100129 | Zm5 | 25305725  | 25306156  | 450 | 432 |
| Sb6 | 15099075 | 15099202 | Zm5 | 25321262  | 25321389  | 128 | 128 |
| Sb6 | 15094710 | 15095377 | Zm5 | 25323953  | 25324619  | 668 | 667 |
| Sb6 | 15085582 | 15085880 | Zm5 | 25327333  | 25327634  | 299 | 302 |
| Sb6 | 15085312 | 15085579 | Zm5 | 25328749  | 25329013  | 268 | 265 |
| Sb6 | 15084914 | 15085267 | Zm5 | 25329029  | 25329373  | 354 | 345 |
| Sb6 | 15083935 | 15084158 | Zm5 | 25329380  | 25329595  | 224 | 216 |
| Sb6 | 15083740 | 15083929 | Zm5 | 25329760  | 25329946  | 190 | 187 |
| Sb6 | 15083362 | 15083415 | Zm5 | 25329960  | 25330013  | 54  | 54  |
| Sb6 | 15078276 | 15078680 | Zm5 | 25342663  | 25343072  | 405 | 410 |
| Sb6 | 15077691 | 15078105 | Zm5 | 25343213  | 25343643  | 415 | 431 |
| Sb6 | 11200009 | 11200093 | Zm5 | 50972142  | 50972226  | 85  | 85  |
| Sb6 | 13148645 | 13148763 | Zm5 | 57510673  | 57510790  | 119 | 118 |
| Sb6 | 12807771 | 12807889 | Zm5 | 57510673  | 57510790  | 119 | 118 |
| Sb6 | 20372884 | 20373008 | Zm5 | 75991664  | 75991787  | 125 | 124 |
| Sb6 | 19178922 | 19178975 | Zm5 | 121061968 | 121062021 | 54  | 54  |
| Sb6 | 17946962 | 17947349 | Zm5 | 178978717 | 178979108 | 388 | 392 |
| Sb6 | 28007204 | 28007263 | Zm5 | 187014682 | 187014741 | 60  | 60  |
| Sb6 | 28005721 | 28006244 | Zm5 | 187018584 | 187019111 | 524 | 528 |

|     |          |          |     |           |           |     |     |
|-----|----------|----------|-----|-----------|-----------|-----|-----|
| Sb6 | 28005154 | 28005289 | Zm5 | 187019662 | 187019787 | 136 | 126 |
| Sb6 | 9790995  | 9791158  | Zm5 | 204500115 | 204500278 | 164 | 164 |
| Sb6 | 12541827 | 12541921 | Zm5 | 213480522 | 213480616 | 95  | 95  |
| Sb6 | 26674517 | 26674702 | Zm6 | 43964630  | 43964815  | 186 | 186 |
| Sb6 | 13594116 | 13594227 | Zm6 | 84287537  | 84287645  | 112 | 109 |
| Sb6 | 13594007 | 13594113 | Zm6 | 84287547  | 84287645  | 107 | 99  |
| Sb6 | 16609187 | 16609230 | Zm6 | 133852642 | 133852685 | 44  | 44  |
| Sb6 | 16608875 | 16609041 | Zm6 | 133852842 | 133853007 | 167 | 166 |
| Sb6 | 10544782 | 10544981 | Zm6 | 153252737 | 153252937 | 200 | 201 |
| Sb6 | 15696327 | 15696402 | Zm7 | 7952368   | 7952442   | 76  | 75  |
| Sb6 | 15697163 | 15697240 | Zm7 | 7953029   | 7953106   | 78  | 78  |
| Sb6 | 16610628 | 16610716 | Zm7 | 19362809  | 19362897  | 89  | 89  |
| Sb6 | 13148992 | 13149268 | Zm7 | 105907773 | 105908048 | 277 | 276 |
| Sb6 | 12808118 | 12808394 | Zm7 | 105907773 | 105908048 | 277 | 276 |
| Sb6 | 26593368 | 26593534 | Zm7 | 137756051 | 137756215 | 167 | 165 |
| Sb6 | 14511579 | 14511705 | Zm7 | 143466896 | 143467022 | 127 | 127 |
| Sb6 | 16608097 | 16608164 | Zm7 | 146126029 | 146126097 | 68  | 69  |
| Sb6 | 26027304 | 26027377 | Zm7 | 151502489 | 151502563 | 74  | 75  |
| Sb6 | 28136265 | 28136330 | Zm7 | 160610492 | 160610557 | 66  | 66  |
| Sb6 | 28122257 | 28122439 | Zm7 | 162481414 | 162481594 | 183 | 181 |
| Sb6 | 15047646 | 15047712 | Zm8 | 68666783  | 68666849  | 67  | 67  |
| Sb6 | 9308169  | 9308318  | Zm8 | 68666926  | 68667065  | 150 | 140 |
| Sb6 | 17293547 | 17293667 | Zm8 | 119891468 | 119891526 | 121 | 59  |
| Sb6 | 12810112 | 12810214 | Zm8 | 127022979 | 127023081 | 103 | 103 |
| Sb6 | 13150986 | 13151088 | Zm8 | 127022979 | 127023081 | 103 | 103 |
| Sb6 | 15109068 | 15109169 | Zm9 | 123516157 | 123516258 | 102 | 102 |

|     |          |          |     |           |           |     |     |
|-----|----------|----------|-----|-----------|-----------|-----|-----|
| Sb6 | 28136050 | 28136222 | Zm9 | 126633413 | 126633585 | 173 | 173 |
| Sb6 | 16137868 | 16137927 | Zm9 | 133091925 | 133091984 | 60  | 60  |
| Sb6 | 28125047 | 28125131 | Zm9 | 133696156 | 133696245 | 85  | 90  |
| Sb6 | 7750227  | 7750302  | Zm2 | 27781339  | 27781414  | 76  | 76  |
| Sb6 | 12541058 | 12541112 | Zm2 | 55393843  | 55393898  | 55  | 56  |
| Sb6 | 30274059 | 30274169 | Zm2 | 76473597  | 76473709  | 111 | 113 |
| Sb6 | 30270909 | 30270962 | Zm2 | 76483065  | 76483118  | 54  | 54  |
| Sb6 | 27261265 | 27261434 | Zm2 | 76900483  | 76900644  | 170 | 162 |
| Sb6 | 27262341 | 27262455 | Zm2 | 76901567  | 76901681  | 115 | 115 |
| Sb6 | 27703220 | 27704032 | Zm2 | 77374448  | 77375272  | 813 | 825 |
| Sb6 | 27705620 | 27705937 | Zm2 | 77375296  | 77375613  | 318 | 318 |
| Sb6 | 27706116 | 27706195 | Zm2 | 77375798  | 77375877  | 80  | 80  |
| Sb6 | 27700033 | 27700152 | Zm2 | 77424744  | 77424863  | 120 | 120 |
| Sb6 | 27699876 | 27699944 | Zm2 | 77425047  | 77425115  | 69  | 69  |
| Sb6 | 27699543 | 27699812 | Zm2 | 77425179  | 77425443  | 270 | 265 |
| Sb6 | 28143573 | 28143800 | Zm2 | 77684800  | 77685025  | 228 | 226 |
| Sb6 | 28143309 | 28143497 | Zm2 | 77685086  | 77685268  | 189 | 183 |
| Sb6 | 28141225 | 28141339 | Zm2 | 77687753  | 77687865  | 115 | 113 |
| Sb6 | 28140337 | 28140530 | Zm2 | 77688037  | 77688227  | 194 | 191 |
| Sb6 | 28139100 | 28139685 | Zm2 | 77688397  | 77688993  | 586 | 597 |
| Sb6 | 26365278 | 26365363 | Zm2 | 77933232  | 77933302  | 86  | 71  |
| Sb6 | 26364366 | 26364497 | Zm2 | 77934077  | 77934209  | 132 | 133 |
| Sb6 | 16373430 | 16373593 | Zm2 | 78372502  | 78372665  | 164 | 164 |
| Sb6 | 16381987 | 16382087 | Zm2 | 78374720  | 78374820  | 101 | 101 |
| Sb6 | 16382194 | 16382270 | Zm2 | 78374897  | 78374973  | 77  | 77  |
| Sb6 | 16382382 | 16382476 | Zm2 | 78375113  | 78375207  | 95  | 95  |

|     |          |          |     |          |          |     |     |
|-----|----------|----------|-----|----------|----------|-----|-----|
| Sb6 | 16382561 | 16382663 | Zm2 | 78375320 | 78375422 | 103 | 103 |
| Sb6 | 16382725 | 16382872 | Zm2 | 78375551 | 78375698 | 148 | 148 |
| Sb6 | 16383126 | 16383232 | Zm2 | 78375802 | 78375908 | 107 | 107 |
| Sb6 | 16383294 | 16383438 | Zm2 | 78376017 | 78376161 | 145 | 145 |
| Sb6 | 16383560 | 16383769 | Zm2 | 78376257 | 78376466 | 210 | 210 |
| Sb6 | 16383867 | 16384009 | Zm2 | 78376555 | 78376697 | 143 | 143 |
| Sb6 | 19215410 | 19216010 | Zm2 | 79470107 | 79470709 | 601 | 603 |
| Sb6 | 19213976 | 19214300 | Zm2 | 79471592 | 79471924 | 325 | 333 |
| Sb6 | 19213195 | 19213296 | Zm2 | 79471926 | 79472027 | 102 | 102 |
| Sb6 | 19212872 | 19213049 | Zm2 | 79474071 | 79474229 | 178 | 159 |
| Sb6 | 19212195 | 19212432 | Zm2 | 79474659 | 79474896 | 238 | 238 |
| Sb6 | 19211793 | 19212157 | Zm2 | 79474913 | 79475277 | 365 | 365 |
| Sb6 | 11001642 | 11001717 | Zm2 | 80606940 | 80607015 | 76  | 76  |
| Sb6 | 11001020 | 11001637 | Zm2 | 80607053 | 80607694 | 618 | 642 |
| Sb6 | 11000594 | 11000966 | Zm2 | 80607749 | 80608119 | 373 | 371 |
| Sb6 | 11000086 | 11000352 | Zm2 | 80608248 | 80608519 | 267 | 272 |
| Sb6 | 10999628 | 10999806 | Zm2 | 80609763 | 80609941 | 179 | 179 |
| Sb6 | 10999082 | 10999469 | Zm2 | 80610087 | 80610485 | 388 | 399 |
| Sb6 | 10998884 | 10999000 | Zm2 | 80610654 | 80610770 | 117 | 117 |
| Sb6 | 10998237 | 10998290 | Zm2 | 80611506 | 80611559 | 54  | 54  |
| Sb6 | 10997646 | 10997787 | Zm2 | 80612621 | 80612763 | 142 | 143 |
| Sb6 | 19103533 | 19103658 | Zm2 | 81525132 | 81525255 | 126 | 124 |
| Sb6 | 19106829 | 19107240 | Zm2 | 81526614 | 81527024 | 412 | 411 |
| Sb6 | 19109783 | 19110408 | Zm2 | 81527173 | 81527764 | 626 | 592 |
| Sb6 | 19111022 | 19111954 | Zm2 | 81528384 | 81529313 | 933 | 930 |
| Sb6 | 19111963 | 19112205 | Zm2 | 81529681 | 81529885 | 243 | 205 |



|     |          |          |     |          |          |      |      |
|-----|----------|----------|-----|----------|----------|------|------|
| Sb6 | 19114450 | 19114590 | Zm2 | 81531062 | 81531203 | 141  | 142  |
| Sb6 | 19114799 | 19114991 | Zm2 | 81531276 | 81531484 | 193  | 209  |
| Sb6 | 19115126 | 19115551 | Zm2 | 81532084 | 81532507 | 426  | 424  |
| Sb6 | 19115594 | 19115646 | Zm2 | 81532575 | 81532627 | 53   | 53   |
| Sb6 | 19127645 | 19128092 | Zm2 | 81542461 | 81542906 | 448  | 446  |
| Sb6 | 19128154 | 19128282 | Zm2 | 81542953 | 81543088 | 129  | 136  |
| Sb6 | 19135548 | 19135728 | Zm2 | 81547931 | 81548109 | 181  | 179  |
| Sb6 | 19136307 | 19136614 | Zm2 | 81548543 | 81548840 | 308  | 298  |
| Sb6 | 19136673 | 19136786 | Zm2 | 81548868 | 81548983 | 114  | 116  |
| Sb6 | 19136959 | 19137056 | Zm2 | 81549514 | 81549612 | 98   | 99   |
| Sb6 | 19137184 | 19137319 | Zm2 | 81552016 | 81552151 | 136  | 136  |
| Sb6 | 19137752 | 19137834 | Zm2 | 81552564 | 81552646 | 83   | 83   |
| Sb6 | 19139304 | 19139453 | Zm2 | 81555629 | 81555780 | 150  | 152  |
| Sb6 | 19139470 | 19139634 | Zm2 | 81555986 | 81556136 | 165  | 151  |
| Sb6 | 19142282 | 19142374 | Zm2 | 81556941 | 81557000 | 93   | 60   |
| Sb6 | 19142820 | 19143016 | Zm2 | 81562015 | 81562212 | 197  | 198  |
| Sb6 | 19143102 | 19143231 | Zm2 | 81562299 | 81562428 | 130  | 130  |
| Sb6 | 19143551 | 19143981 | Zm2 | 81563088 | 81563508 | 431  | 421  |
| Sb6 | 19144064 | 19144268 | Zm2 | 81563508 | 81563706 | 205  | 199  |
| Sb6 | 19144296 | 19144389 | Zm2 | 81563785 | 81563880 | 94   | 96   |
| Sb6 | 19144466 | 19144882 | Zm2 | 81564015 | 81564429 | 417  | 415  |
| Sb6 | 10659577 | 10660633 | Zm2 | 81832779 | 81833792 | 1057 | 1014 |
| Sb6 | 10660878 | 10660945 | Zm2 | 81834170 | 81834219 | 68   | 50   |
| Sb6 | 10660947 | 10661005 | Zm2 | 81838026 | 81838084 | 59   | 59   |
| Sb6 | 10661054 | 10661148 | Zm2 | 81838840 | 81838934 | 95   | 95   |
| Sb6 | 10661976 | 10662453 | Zm2 | 81841806 | 81842290 | 478  | 485  |

|     |          |          |     |          |          |      |      |
|-----|----------|----------|-----|----------|----------|------|------|
| Sb6 | 10666169 | 10666604 | Zm2 | 81843228 | 81843668 | 436  | 441  |
| Sb6 | 10676036 | 10676354 | Zm2 | 81843678 | 81843985 | 319  | 308  |
| Sb6 | 10676362 | 10676409 | Zm2 | 81863344 | 81863387 | 48   | 44   |
| Sb6 | 10676452 | 10676798 | Zm2 | 81866263 | 81866604 | 347  | 342  |
| Sb6 | 10676841 | 10677039 | Zm2 | 81866657 | 81866855 | 199  | 199  |
| Sb6 | 10677546 | 10677644 | Zm2 | 81866966 | 81867064 | 99   | 99   |
| Sb6 | 10677675 | 10678766 | Zm2 | 81868947 | 81870055 | 1092 | 1109 |
| Sb6 | 7140376  | 7141439  | Zm2 | 82804415 | 82805467 | 1064 | 1053 |
| Sb6 | 7154336  | 7154501  | Zm2 | 82820390 | 82820560 | 166  | 171  |
| Sb6 | 7154515  | 7155157  | Zm2 | 82820546 | 82821194 | 643  | 649  |
| Sb6 | 7155216  | 7155633  | Zm2 | 82821269 | 82821664 | 418  | 396  |
| Sb6 | 7293027  | 7293123  | Zm2 | 82872118 | 82872214 | 97   | 97   |
| Sb6 | 7292809  | 7292945  | Zm2 | 82872280 | 82872413 | 137  | 134  |
| Sb6 | 7292633  | 7292739  | Zm2 | 82872451 | 82872556 | 107  | 106  |
| Sb6 | 7292270  | 7292379  | Zm2 | 82872693 | 82872802 | 110  | 110  |
| Sb6 | 7291999  | 7292267  | Zm2 | 82872830 | 82873104 | 269  | 275  |
| Sb6 | 7291873  | 7291987  | Zm2 | 82873213 | 82873327 | 115  | 115  |
| Sb6 | 7291751  | 7291851  | Zm2 | 82873936 | 82874034 | 101  | 99   |
| Sb6 | 7290895  | 7291118  | Zm2 | 82874849 | 82875076 | 224  | 228  |
| Sb6 | 7276624  | 7276791  | Zm2 | 82875165 | 82875333 | 168  | 169  |
| Sb6 | 9778992  | 9779403  | Zm2 | 83180547 | 83180913 | 412  | 367  |
| Sb6 | 9781156  | 9781305  | Zm2 | 83188055 | 83188186 | 150  | 132  |
| Sb6 | 9781531  | 9781828  | Zm2 | 83188448 | 83188732 | 298  | 285  |
| Sb6 | 9782691  | 9782735  | Zm2 | 83194165 | 83194198 | 45   | 34   |
| Sb6 | 9785947  | 9786109  | Zm2 | 83199095 | 83199254 | 163  | 160  |
| Sb6 | 10109299 | 10109618 | Zm2 | 83298769 | 83299097 | 320  | 329  |

|     |          |          |     |          |          |      |      |
|-----|----------|----------|-----|----------|----------|------|------|
| Sb6 | 10109662 | 10109804 | Zm2 | 83299112 | 83299254 | 143  | 143  |
| Sb6 | 10109897 | 10110013 | Zm2 | 83299302 | 83299417 | 117  | 116  |
| Sb6 | 10110673 | 10110894 | Zm2 | 83299481 | 83299703 | 222  | 223  |
| Sb6 | 10112687 | 10112913 | Zm2 | 83326651 | 83326874 | 227  | 224  |
| Sb6 | 10112988 | 10113574 | Zm2 | 83327000 | 83327566 | 587  | 567  |
| Sb6 | 15303094 | 15304152 | Zm2 | 84132842 | 84133880 | 1059 | 1039 |
| Sb6 | 15304559 | 15305521 | Zm2 | 84134069 | 84135034 | 963  | 966  |
| Sb6 | 15305586 | 15305720 | Zm2 | 84135099 | 84135239 | 135  | 141  |
| Sb6 | 15357739 | 15357974 | Zm2 | 84208343 | 84208578 | 236  | 236  |
| Sb6 | 15357997 | 15358184 | Zm2 | 84208724 | 84208909 | 188  | 186  |
| Sb6 | 15358228 | 15358434 | Zm2 | 84209006 | 84209214 | 207  | 209  |
| Sb6 | 15364080 | 15364380 | Zm2 | 84209246 | 84209542 | 301  | 297  |
| Sb6 | 15365361 | 15366004 | Zm2 | 84213419 | 84214052 | 644  | 634  |
| Sb6 | 16139406 | 16140017 | Zm2 | 84608766 | 84609371 | 612  | 606  |
| Sb6 | 16158480 | 16158550 | Zm2 | 84611530 | 84611600 | 71   | 71   |
| Sb6 | 16158690 | 16158853 | Zm2 | 84611709 | 84611872 | 164  | 164  |
| Sb6 | 16159019 | 16159389 | Zm2 | 84612244 | 84612613 | 371  | 370  |
| Sb6 | 16159425 | 16159545 | Zm2 | 84612637 | 84612751 | 121  | 115  |
| Sb6 | 16159794 | 16160382 | Zm2 | 84612795 | 84613377 | 589  | 583  |
| Sb6 | 16160613 | 16161014 | Zm2 | 84613768 | 84614164 | 402  | 397  |
| Sb6 | 16161045 | 16161388 | Zm2 | 84614582 | 84614923 | 344  | 342  |
| Sb6 | 14203311 | 14203508 | Zm2 | 84783831 | 84784027 | 198  | 197  |
| Sb6 | 14203181 | 14203247 | Zm2 | 84784092 | 84784158 | 67   | 67   |
| Sb6 | 14202555 | 14202609 | Zm2 | 84784698 | 84784752 | 55   | 55   |
| Sb6 | 14202183 | 14202441 | Zm2 | 84784883 | 84785141 | 259  | 259  |
| Sb6 | 14202038 | 14202180 | Zm2 | 84785241 | 84785383 | 143  | 143  |

|     |          |          |     |          |          |     |     |
|-----|----------|----------|-----|----------|----------|-----|-----|
| Sb6 | 14201820 | 14201946 | Zm2 | 84785471 | 84785600 | 127 | 130 |
| Sb6 | 14201524 | 14201682 | Zm2 | 84785745 | 84785909 | 159 | 165 |
| Sb6 | 14200947 | 14201000 | Zm2 | 84786504 | 84786557 | 54  | 54  |
| Sb6 | 14111537 | 14111611 | Zm2 | 84940316 | 84940390 | 75  | 75  |
| Sb6 | 11817273 | 11817333 | Zm2 | 85179782 | 85179842 | 61  | 61  |
| Sb6 | 12094193 | 12094502 | Zm2 | 85451030 | 85451354 | 310 | 325 |
| Sb6 | 12175521 | 12176191 | Zm2 | 85632040 | 85632706 | 671 | 667 |
| Sb6 | 12176490 | 12176547 | Zm2 | 85633006 | 85633063 | 58  | 58  |
| Sb6 | 13883565 | 13884103 | Zm2 | 85672652 | 85673102 | 539 | 451 |
| Sb6 | 26687382 | 26687495 | Zm2 | 86096985 | 86097089 | 114 | 105 |
| Sb6 | 26685712 | 26685814 | Zm2 | 86098405 | 86098509 | 103 | 105 |
| Sb6 | 26685059 | 26685141 | Zm2 | 86099490 | 86099570 | 83  | 81  |
| Sb6 | 16704608 | 16704771 | Zm2 | 87886151 | 87886317 | 164 | 167 |
| Sb6 | 16705986 | 16706092 | Zm2 | 87886220 | 87886327 | 107 | 108 |
| Sb6 | 16706527 | 16706595 | Zm2 | 87886700 | 87886768 | 69  | 69  |
| Sb6 | 16706810 | 16707121 | Zm2 | 87886965 | 87887279 | 312 | 315 |
| Sb6 | 10276655 | 10277031 | Zm2 | 88036186 | 88036559 | 377 | 374 |
| Sb6 | 10276366 | 10276553 | Zm2 | 88036659 | 88036846 | 188 | 188 |
| Sb6 | 10276014 | 10276250 | Zm2 | 88036981 | 88037208 | 237 | 228 |
| Sb6 | 10275449 | 10275681 | Zm2 | 88037470 | 88037702 | 233 | 233 |
| Sb6 | 10275114 | 10275213 | Zm2 | 88037875 | 88037974 | 100 | 100 |
| Sb6 | 10274362 | 10274694 | Zm2 | 88038359 | 88038697 | 333 | 339 |
| Sb6 | 10272731 | 10272799 | Zm2 | 88045937 | 88046005 | 69  | 69  |
| Sb6 | 18891311 | 18891526 | Zm2 | 90214242 | 90214445 | 216 | 204 |
| Sb6 | 18891662 | 18891739 | Zm2 | 90214609 | 90214684 | 78  | 76  |
| Sb6 | 18891988 | 18892454 | Zm2 | 90214940 | 90215388 | 467 | 449 |

|     |          |          |      |           |           |     |     |
|-----|----------|----------|------|-----------|-----------|-----|-----|
| Sb6 | 30961486 | 30961540 | Zm2  | 122448841 | 122448895 | 55  | 55  |
| Sb6 | 30961226 | 30961436 | Zm2  | 122448918 | 122449129 | 211 | 212 |
| Sb6 | 8935149  | 8935224  | Zm2  | 168957051 | 168957127 | 76  | 77  |
| Sb6 | 25918621 | 25918807 | Zm2  | 198852509 | 198852698 | 187 | 190 |
| Sb6 | 25918912 | 25919047 | Zm2  | 198852827 | 198852962 | 136 | 136 |
| Sb6 | 25919050 | 25919385 | Zm2  | 198854305 | 198854642 | 336 | 338 |
| Sb6 | 26027466 | 26027506 | Zm2  | 201996965 | 201997005 | 41  | 41  |
| Sb7 | 44164567 | 44164697 | Zm1  | 39134881  | 39135010  | 131 | 130 |
| Sb7 | 42079352 | 42079423 | Zm1  | 142992923 | 142992982 | 72  | 60  |
| Sb7 | 41597858 | 41597970 | Zm1  | 143713380 | 143713492 | 113 | 113 |
| Sb7 | 40024139 | 40024201 | Zm1  | 187503195 | 187503230 | 63  | 36  |
| Sb7 | 40023340 | 40023457 | Zm1  | 187504047 | 187504145 | 118 | 99  |
| Sb7 | 44541899 | 44541998 | Zm1  | 198074026 | 198074124 | 100 | 99  |
| Sb7 | 44541738 | 44541897 | Zm1  | 198074103 | 198074263 | 160 | 161 |
| Sb7 | 39057052 | 39057257 | Zm1  | 293970430 | 293970636 | 206 | 207 |
| Sb7 | 36630647 | 36630712 | Zm10 | 1497974   | 1498038   | 66  | 65  |
| Sb7 | 31585353 | 31585438 | Zm10 | 4111740   | 4111838   | 86  | 99  |
| Sb7 | 30642236 | 30642441 | Zm10 | 5878609   | 5878810   | 206 | 202 |
| Sb7 | 30643202 | 30643352 | Zm10 | 5879434   | 5879583   | 151 | 150 |
| Sb7 | 21917109 | 21917208 | Zm10 | 13603718  | 13603818  | 100 | 101 |
| Sb7 | 43050508 | 43050794 | Zm10 | 23843246  | 23843523  | 287 | 278 |
| Sb7 | 43050880 | 43051128 | Zm10 | 23843609  | 23843862  | 249 | 254 |
| Sb7 | 21673170 | 21673716 | Zm10 | 55235859  | 55236421  | 547 | 563 |
| Sb7 | 20733206 | 20733367 | Zm10 | 55959669  | 55959808  | 162 | 140 |
| Sb7 | 39669684 | 39669799 | Zm10 | 56130951  | 56131063  | 116 | 113 |
| Sb7 | 39669955 | 39670075 | Zm10 | 56131164  | 56131285  | 121 | 122 |

|     |          |          |      |           |           |     |     |
|-----|----------|----------|------|-----------|-----------|-----|-----|
| Sb7 | 39670886 | 39670964 | Zm10 | 56131328  | 56131399  | 79  | 72  |
| Sb7 | 39671811 | 39671944 | Zm10 | 56132305  | 56132441  | 134 | 137 |
| Sb7 | 39680807 | 39680862 | Zm10 | 56143792  | 56143832  | 56  | 41  |
| Sb7 | 40100601 | 40100679 | Zm10 | 56479867  | 56479945  | 79  | 79  |
| Sb7 | 40119251 | 40119331 | Zm10 | 56495147  | 56495225  | 81  | 79  |
| Sb7 | 40379599 | 40380487 | Zm10 | 56928312  | 56929157  | 889 | 846 |
| Sb7 | 40379451 | 40379596 | Zm10 | 56929238  | 56929380  | 146 | 143 |
| Sb7 | 40378754 | 40379241 | Zm10 | 56929755  | 56930240  | 488 | 486 |
| Sb7 | 40376942 | 40377120 | Zm10 | 56931877  | 56932056  | 179 | 180 |
| Sb7 | 40376768 | 40376884 | Zm10 | 56932109  | 56932225  | 117 | 117 |
| Sb7 | 44163026 | 44163223 | Zm10 | 105784627 | 105784829 | 198 | 203 |
| Sb7 | 37908878 | 37909007 | Zm10 | 118642026 | 118642158 | 130 | 133 |
| Sb7 | 37465734 | 37465820 | Zm2  | 713308    | 713387    | 87  | 80  |
| Sb7 | 24434951 | 24435308 | Zm2  | 1436322   | 1436690   | 358 | 369 |
| Sb7 | 40117113 | 40117185 | Zm2  | 3975104   | 3975168   | 73  | 65  |
| Sb7 | 27214197 | 27214286 | Zm2  | 5820481   | 5820571   | 90  | 91  |
| Sb7 | 23691518 | 23691591 | Zm2  | 8226702   | 8226775   | 74  | 74  |
| Sb7 | 40022280 | 40022338 | Zm2  | 15889548  | 15889606  | 59  | 59  |
| Sb7 | 40022384 | 40022507 | Zm2  | 15890443  | 15890566  | 124 | 124 |
| Sb7 | 40022562 | 40022656 | Zm2  | 15891685  | 15891779  | 95  | 95  |
| Sb7 | 42764383 | 42764464 | Zm2  | 37641379  | 37641460  | 82  | 82  |
| Sb7 | 38976285 | 38976487 | Zm2  | 51409739  | 51409941  | 203 | 203 |
| Sb7 | 42745321 | 42745484 | Zm2  | 91188691  | 91188854  | 164 | 164 |
| Sb7 | 42745171 | 42745317 | Zm2  | 91188880  | 91189027  | 147 | 148 |
| Sb7 | 37517924 | 37518189 | Zm2  | 137526037 | 137526302 | 266 | 266 |
| Sb7 | 20729876 | 20729994 | Zm2  | 163635381 | 163635498 | 119 | 118 |

|     |          |          |     |           |           |     |     |
|-----|----------|----------|-----|-----------|-----------|-----|-----|
| Sb7 | 37677362 | 37677563 | Zm2 | 164989310 | 164989424 | 202 | 115 |
| Sb7 | 27409137 | 27409376 | Zm2 | 168946128 | 168946361 | 240 | 234 |
| Sb7 | 27413402 | 27413595 | Zm2 | 168946847 | 168947040 | 194 | 194 |
| Sb7 | 27413895 | 27414119 | Zm2 | 168947328 | 168947552 | 225 | 225 |
| Sb7 | 27414326 | 27414448 | Zm2 | 168947762 | 168947884 | 123 | 123 |
| Sb7 | 27423759 | 27423868 | Zm2 | 168950413 | 168950522 | 110 | 110 |
| Sb7 | 27438571 | 27438862 | Zm2 | 168953150 | 168953441 | 292 | 292 |
| Sb7 | 27439412 | 27439537 | Zm2 | 168953991 | 168954116 | 126 | 126 |
| Sb7 | 27440902 | 27440979 | Zm2 | 168957424 | 168957496 | 78  | 73  |
| Sb7 | 36446650 | 36446708 | Zm2 | 175371548 | 175371606 | 59  | 59  |
| Sb7 | 38975343 | 38975458 | Zm2 | 195611564 | 195611677 | 116 | 114 |
| Sb7 | 40383315 | 40383373 | Zm2 | 200612583 | 200612641 | 59  | 59  |
| Sb7 | 44163485 | 44163564 | Zm2 | 206691100 | 206691179 | 80  | 80  |
| Sb7 | 43050362 | 43050443 | Zm2 | 226969617 | 226969698 | 82  | 82  |
| Sb7 | 45040578 | 45040877 | Zm3 | 3665714   | 3666003   | 300 | 290 |
| Sb7 | 24439203 | 24439277 | Zm3 | 7932691   | 7932765   | 75  | 75  |
| Sb7 | 24439315 | 24439404 | Zm3 | 7932809   | 7932898   | 90  | 90  |
| Sb7 | 22589566 | 22589679 | Zm3 | 28482300  | 28482413  | 114 | 114 |
| Sb7 | 36105950 | 36106110 | Zm3 | 84177647  | 84177807  | 161 | 161 |
| Sb7 | 36106146 | 36106761 | Zm3 | 84177945  | 84178588  | 616 | 644 |
| Sb7 | 36106802 | 36106877 | Zm3 | 84178652  | 84178726  | 76  | 75  |
| Sb7 | 21345481 | 21345529 | Zm3 | 114395743 | 114395791 | 49  | 49  |
| Sb7 | 43743768 | 43743976 | Zm3 | 135262572 | 135262784 | 209 | 213 |
| Sb7 | 37988074 | 37988137 | Zm3 | 164299679 | 164299742 | 64  | 64  |
| Sb7 | 23698059 | 23698218 | Zm3 | 164332806 | 164332965 | 160 | 160 |
| Sb7 | 35638723 | 35638811 | Zm3 | 164814817 | 164814906 | 89  | 90  |

|     |          |          |     |           |           |     |     |
|-----|----------|----------|-----|-----------|-----------|-----|-----|
| Sb7 | 27214625 | 27214770 | Zm3 | 172717939 | 172718091 | 146 | 153 |
| Sb7 | 40383973 | 40384080 | Zm3 | 182321189 | 182321297 | 108 | 109 |
| Sb7 | 40384109 | 40384213 | Zm3 | 182321471 | 182321574 | 105 | 104 |
| Sb7 | 40384615 | 40384736 | Zm3 | 182322285 | 182322405 | 122 | 121 |
| Sb7 | 40384781 | 40385041 | Zm3 | 182322461 | 182322722 | 261 | 262 |
| Sb7 | 42754601 | 42754924 | Zm3 | 190017293 | 190017612 | 324 | 320 |
| Sb7 | 26942808 | 26943044 | Zm3 | 192077589 | 192077817 | 237 | 229 |
| Sb7 | 26943087 | 26943319 | Zm3 | 192077879 | 192078104 | 233 | 226 |
| Sb7 | 36088984 | 36089093 | Zm3 | 221511719 | 221511827 | 110 | 109 |
| Sb7 | 27214465 | 27214583 | Zm3 | 222169856 | 222169976 | 119 | 121 |
| Sb7 | 37948486 | 37948557 | Zm4 | 23775263  | 23775334  | 72  | 72  |
| Sb7 | 37907207 | 37907257 | Zm4 | 23816524  | 23816574  | 51  | 51  |
| Sb7 | 37906072 | 37906125 | Zm4 | 23817591  | 23817640  | 54  | 50  |
| Sb7 | 37705033 | 37705255 | Zm4 | 23966832  | 23967048  | 223 | 217 |
| Sb7 | 37880462 | 37880580 | Zm4 | 24033036  | 24033154  | 119 | 119 |
| Sb7 | 37051783 | 37052140 | Zm4 | 24139463  | 24139796  | 358 | 334 |
| Sb7 | 37052421 | 37052724 | Zm4 | 24139792  | 24140089  | 304 | 298 |
| Sb7 | 37052761 | 37053489 | Zm4 | 24140154  | 24140866  | 729 | 713 |
| Sb7 | 37053510 | 37053583 | Zm4 | 24141003  | 24141076  | 74  | 74  |
| Sb7 | 37053740 | 37054156 | Zm4 | 24141246  | 24141667  | 417 | 422 |
| Sb7 | 37054306 | 37054367 | Zm4 | 24141683  | 24141744  | 62  | 62  |
| Sb7 | 37051614 | 37051663 | Zm4 | 24262545  | 24262594  | 50  | 50  |
| Sb7 | 37050717 | 37051307 | Zm4 | 24262607  | 24263210  | 591 | 604 |
| Sb7 | 37050185 | 37050712 | Zm4 | 24264253  | 24264789  | 528 | 537 |
| Sb7 | 37036616 | 37037084 | Zm4 | 24270328  | 24270793  | 469 | 466 |
| Sb7 | 37035970 | 37036309 | Zm4 | 24279190  | 24279533  | 340 | 344 |



|     |          |          |     |          |          |      |      |
|-----|----------|----------|-----|----------|----------|------|------|
| Sb7 | 37035705 | 37035924 | Zm4 | 24279613 | 24279828 | 220  | 216  |
| Sb7 | 37028995 | 37029442 | Zm4 | 24281557 | 24282011 | 448  | 455  |
| Sb7 | 37026697 | 37028238 | Zm4 | 24282851 | 24284408 | 1542 | 1558 |
| Sb7 | 36757025 | 36757151 | Zm4 | 24475138 | 24475238 | 127  | 101  |
| Sb7 | 36757838 | 36757924 | Zm4 | 24476023 | 24476091 | 87   | 69   |
| Sb7 | 36579393 | 36580143 | Zm4 | 24771228 | 24771986 | 751  | 759  |
| Sb7 | 36580198 | 36580588 | Zm4 | 24772002 | 24772399 | 391  | 398  |
| Sb7 | 36580695 | 36581317 | Zm4 | 24772489 | 24773121 | 623  | 633  |
| Sb7 | 37886447 | 37886541 | Zm4 | 28175207 | 28175301 | 95   | 95   |
| Sb7 | 41597546 | 41597579 | Zm4 | 61480825 | 61480858 | 34   | 34   |
| Sb7 | 41596874 | 41597144 | Zm4 | 61481191 | 61481472 | 271  | 282  |
| Sb7 | 22400816 | 22401793 | Zm4 | 62020697 | 62021654 | 978  | 958  |
| Sb7 | 22402042 | 22402108 | Zm4 | 62022514 | 62022580 | 67   | 67   |
| Sb7 | 22402171 | 22402237 | Zm4 | 62022666 | 62022733 | 67   | 68   |
| Sb7 | 22402298 | 22402582 | Zm4 | 62022819 | 62023099 | 285  | 281  |
| Sb7 | 22402721 | 22402816 | Zm4 | 62023388 | 62023483 | 96   | 96   |
| Sb7 | 22402888 | 22402942 | Zm4 | 62023809 | 62023863 | 55   | 55   |
| Sb7 | 22403033 | 22403149 | Zm4 | 62023962 | 62024077 | 117  | 116  |
| Sb7 | 22603755 | 22603817 | Zm4 | 62156877 | 62156939 | 63   | 63   |
| Sb7 | 22603511 | 22603619 | Zm4 | 62157064 | 62157169 | 109  | 106  |
| Sb7 | 22600541 | 22600636 | Zm4 | 62189078 | 62189172 | 96   | 95   |
| Sb7 | 22599002 | 22600500 | Zm4 | 62189239 | 62190747 | 1499 | 1509 |
| Sb7 | 22591946 | 22592999 | Zm4 | 62190872 | 62191932 | 1054 | 1061 |
| Sb7 | 40446608 | 40446940 | Zm4 | 65630143 | 65630489 | 333  | 347  |
| Sb7 | 40446044 | 40446474 | Zm4 | 65630605 | 65631032 | 431  | 428  |
| Sb7 | 40445648 | 40445963 | Zm4 | 65631144 | 65631449 | 316  | 306  |

|     |          |          |     |          |          |      |      |
|-----|----------|----------|-----|----------|----------|------|------|
| Sb7 | 40445388 | 40445601 | Zm4 | 65631537 | 65631739 | 214  | 203  |
| Sb7 | 40444953 | 40445263 | Zm4 | 65632023 | 65632328 | 311  | 306  |
| Sb7 | 40443382 | 40444766 | Zm4 | 65640424 | 65641804 | 1385 | 1381 |
| Sb7 | 40443317 | 40443374 | Zm4 | 65641934 | 65641991 | 58   | 58   |
| Sb7 | 40443181 | 40443261 | Zm4 | 65642038 | 65642119 | 81   | 82   |
| Sb7 | 40442484 | 40442622 | Zm4 | 65646675 | 65646812 | 139  | 138  |
| Sb7 | 40442312 | 40442446 | Zm4 | 65646818 | 65646952 | 135  | 135  |
| Sb7 | 40441896 | 40442124 | Zm4 | 65647042 | 65647276 | 229  | 235  |
| Sb7 | 40441401 | 40441875 | Zm4 | 65647564 | 65648040 | 475  | 477  |
| Sb7 | 40440929 | 40441050 | Zm4 | 65648391 | 65648440 | 122  | 50   |
| Sb7 | 26455062 | 26455166 | Zm4 | 65798228 | 65798328 | 105  | 101  |
| Sb7 | 26454936 | 26454998 | Zm4 | 65798391 | 65798453 | 63   | 63   |
| Sb7 | 26454284 | 26454603 | Zm4 | 65798609 | 65798923 | 320  | 315  |
| Sb7 | 26453476 | 26454106 | Zm4 | 65799104 | 65799743 | 631  | 640  |
| Sb7 | 26453064 | 26453178 | Zm4 | 65800026 | 65800140 | 115  | 115  |
| Sb7 | 26452845 | 26452950 | Zm4 | 65801497 | 65801599 | 106  | 103  |
| Sb7 | 26452766 | 26452842 | Zm4 | 65801677 | 65801754 | 77   | 78   |
| Sb7 | 26438455 | 26438608 | Zm4 | 65805810 | 65805960 | 154  | 151  |
| Sb7 | 26433022 | 26433346 | Zm4 | 65816248 | 65816575 | 325  | 328  |
| Sb7 | 26419872 | 26419968 | Zm4 | 65816568 | 65816661 | 97   | 94   |
| Sb7 | 26419728 | 26419867 | Zm4 | 65824153 | 65824292 | 140  | 140  |
| Sb7 | 26419632 | 26419675 | Zm4 | 65824346 | 65824389 | 44   | 44   |
| Sb7 | 26419494 | 26419584 | Zm4 | 65824588 | 65824677 | 91   | 90   |
| Sb7 | 26407729 | 26407813 | Zm4 | 65824679 | 65824763 | 85   | 85   |
| Sb7 | 26407467 | 26407519 | Zm4 | 65824788 | 65824840 | 53   | 53   |
| Sb7 | 26407269 | 26407424 | Zm4 | 65825322 | 65825478 | 156  | 157  |

|     |          |          |     |          |          |      |      |
|-----|----------|----------|-----|----------|----------|------|------|
| Sb7 | 26406984 | 26407068 | Zm4 | 65831209 | 65831293 | 85   | 85   |
| Sb7 | 26402112 | 26402912 | Zm4 | 65831352 | 65832150 | 801  | 799  |
| Sb7 | 26401879 | 26402005 | Zm4 | 65832281 | 65832409 | 127  | 129  |
| Sb7 | 26401672 | 26401801 | Zm4 | 65832575 | 65832704 | 130  | 130  |
| Sb7 | 26401184 | 26401343 | Zm4 | 65832842 | 65833003 | 160  | 162  |
| Sb7 | 26401082 | 26401168 | Zm4 | 65833239 | 65833325 | 87   | 87   |
| Sb7 | 26399559 | 26400882 | Zm4 | 65844491 | 65845820 | 1324 | 1330 |
| Sb7 | 26399374 | 26399533 | Zm4 | 65845838 | 65845997 | 160  | 160  |
| Sb7 | 26398374 | 26399188 | Zm4 | 65846016 | 65846824 | 815  | 809  |
| Sb7 | 26398041 | 26398296 | Zm4 | 65846900 | 65847153 | 256  | 254  |
| Sb7 | 26397060 | 26397728 | Zm4 | 65847203 | 65847870 | 669  | 668  |
| Sb7 | 26396624 | 26396979 | Zm4 | 65847952 | 65848324 | 356  | 373  |
| Sb7 | 26395963 | 26396605 | Zm4 | 65848360 | 65848961 | 643  | 602  |
| Sb7 | 26395130 | 26395863 | Zm4 | 65849201 | 65849934 | 734  | 734  |
| Sb7 | 26394033 | 26394683 | Zm4 | 65850385 | 65851046 | 651  | 662  |
| Sb7 | 24561454 | 24561581 | Zm4 | 66287811 | 66287886 | 128  | 76   |
| Sb7 | 23580261 | 23581176 | Zm4 | 66343147 | 66344086 | 916  | 940  |
| Sb7 | 23581305 | 23581927 | Zm4 | 66344183 | 66344795 | 623  | 613  |
| Sb7 | 23583997 | 23584157 | Zm4 | 66356652 | 66356815 | 161  | 164  |
| Sb7 | 23595109 | 23595397 | Zm4 | 66357588 | 66357889 | 289  | 302  |
| Sb7 | 23595597 | 23595760 | Zm4 | 66358106 | 66358261 | 164  | 156  |
| Sb7 | 39061701 | 39061857 | Zm4 | 66506874 | 66507030 | 157  | 157  |
| Sb7 | 39061291 | 39061512 | Zm4 | 66507198 | 66507419 | 222  | 222  |
| Sb7 | 38709429 | 38709539 | Zm4 | 66990354 | 66990438 | 111  | 85   |
| Sb7 | 38710113 | 38710295 | Zm4 | 66991072 | 66991193 | 183  | 122  |
| Sb7 | 38478327 | 38478445 | Zm4 | 67261822 | 67261946 | 119  | 125  |

|     |          |          |     |          |          |      |      |
|-----|----------|----------|-----|----------|----------|------|------|
| Sb7 | 30887965 | 30888098 | Zm4 | 71528693 | 71528822 | 134  | 130  |
| Sb7 | 30887643 | 30887856 | Zm4 | 71528935 | 71529144 | 214  | 210  |
| Sb7 | 30886870 | 30886934 | Zm4 | 71529808 | 71529871 | 65   | 64   |
| Sb7 | 30884184 | 30884576 | Zm4 | 71533791 | 71534180 | 393  | 390  |
| Sb7 | 30875571 | 30875981 | Zm4 | 71534188 | 71534606 | 411  | 419  |
| Sb7 | 30874223 | 30874443 | Zm4 | 71535352 | 71535559 | 221  | 208  |
| Sb7 | 30867160 | 30867433 | Zm4 | 71536038 | 71536315 | 274  | 278  |
| Sb7 | 30866469 | 30867158 | Zm4 | 71536344 | 71537020 | 690  | 677  |
| Sb7 | 30865525 | 30866330 | Zm4 | 71537168 | 71537987 | 806  | 820  |
| Sb7 | 30865114 | 30865357 | Zm4 | 71538019 | 71538263 | 244  | 245  |
| Sb7 | 30864953 | 30865099 | Zm4 | 71538252 | 71538390 | 147  | 139  |
| Sb7 | 30864217 | 30864869 | Zm4 | 71538509 | 71539160 | 653  | 652  |
| Sb7 | 30856560 | 30856633 | Zm4 | 71539906 | 71539979 | 74   | 74   |
| Sb7 | 30854994 | 30856242 | Zm4 | 71540425 | 71541709 | 1249 | 1285 |
| Sb7 | 30854656 | 30854978 | Zm4 | 71542605 | 71542930 | 323  | 326  |
| Sb7 | 30854264 | 30854652 | Zm4 | 71542812 | 71543204 | 389  | 393  |
| Sb7 | 30853353 | 30854240 | Zm4 | 71543664 | 71544530 | 888  | 867  |
| Sb7 | 41618662 | 41619477 | Zm4 | 71820548 | 71821353 | 816  | 806  |
| Sb7 | 41616438 | 41616474 | Zm4 | 71834770 | 71834805 | 37   | 36   |
| Sb7 | 41615048 | 41615220 | Zm4 | 71836323 | 71836493 | 173  | 171  |
| Sb7 | 41614666 | 41615023 | Zm4 | 71836494 | 71836851 | 358  | 358  |
| Sb7 | 41614383 | 41614489 | Zm4 | 71836894 | 71837002 | 107  | 109  |
| Sb7 | 41613583 | 41613833 | Zm4 | 71841329 | 71841584 | 251  | 256  |
| Sb7 | 41604171 | 41604422 | Zm4 | 71842811 | 71843057 | 252  | 247  |
| Sb7 | 26967691 | 26968336 | Zm4 | 72254695 | 72255342 | 646  | 648  |
| Sb7 | 26966130 | 26966201 | Zm4 | 72255435 | 72255506 | 72   | 72   |

|     |          |          |     |          |          |      |      |
|-----|----------|----------|-----|----------|----------|------|------|
| Sb7 | 26965937 | 26966128 | Zm4 | 72256147 | 72256340 | 192  | 194  |
| Sb7 | 26964457 | 26964780 | Zm4 | 72257341 | 72257665 | 324  | 325  |
| Sb7 | 26952261 | 26952720 | Zm4 | 72257783 | 72258247 | 460  | 465  |
| Sb7 | 26963892 | 26964365 | Zm4 | 72257769 | 72258247 | 474  | 479  |
| Sb7 | 26963738 | 26963890 | Zm4 | 72258289 | 72258458 | 153  | 170  |
| Sb7 | 26952107 | 26952259 | Zm4 | 72258289 | 72258458 | 153  | 170  |
| Sb7 | 26951652 | 26951747 | Zm4 | 72258590 | 72258684 | 96   | 95   |
| Sb7 | 26963283 | 26963378 | Zm4 | 72258590 | 72258684 | 96   | 95   |
| Sb7 | 26963103 | 26963212 | Zm4 | 72258767 | 72258870 | 110  | 104  |
| Sb7 | 26951472 | 26951581 | Zm4 | 72258767 | 72258870 | 110  | 104  |
| Sb7 | 26950914 | 26951451 | Zm4 | 72258863 | 72259422 | 538  | 560  |
| Sb7 | 26962514 | 26963082 | Zm4 | 72258863 | 72259453 | 569  | 591  |
| Sb7 | 42423424 | 42423469 | Zm4 | 72330690 | 72330735 | 46   | 46   |
| Sb7 | 42423360 | 42423415 | Zm4 | 72330682 | 72330737 | 56   | 56   |
| Sb7 | 42420956 | 42421068 | Zm4 | 72331208 | 72331317 | 113  | 110  |
| Sb7 | 42419380 | 42419563 | Zm4 | 72332158 | 72332341 | 184  | 184  |
| Sb7 | 42418498 | 42418708 | Zm4 | 72332376 | 72332591 | 211  | 216  |
| Sb7 | 42417053 | 42417278 | Zm4 | 72340780 | 72340978 | 226  | 199  |
| Sb7 | 42416702 | 42416915 | Zm4 | 72341116 | 72341314 | 214  | 199  |
| Sb7 | 42416453 | 42416528 | Zm4 | 72341511 | 72341577 | 76   | 67   |
| Sb7 | 42415423 | 42415954 | Zm4 | 72342636 | 72343169 | 532  | 534  |
| Sb7 | 46190453 | 46190524 | Zm4 | 73306904 | 73306976 | 72   | 73   |
| Sb7 | 46191308 | 46191847 | Zm4 | 73307757 | 73308277 | 540  | 521  |
| Sb7 | 46192177 | 46192514 | Zm4 | 73308480 | 73308794 | 338  | 315  |
| Sb7 | 46192567 | 46192839 | Zm4 | 73308816 | 73309084 | 273  | 269  |
| Sb7 | 46198855 | 46199968 | Zm4 | 73309972 | 73311100 | 1114 | 1129 |

|     |          |          |     |          |          |      |      |
|-----|----------|----------|-----|----------|----------|------|------|
| Sb7 | 46203923 | 46204354 | Zm4 | 73311261 | 73311682 | 432  | 422  |
| Sb7 | 46204512 | 46204645 | Zm4 | 73311964 | 73312100 | 134  | 137  |
| Sb7 | 41418260 | 41418467 | Zm4 | 73597735 | 73597942 | 208  | 208  |
| Sb7 | 41423971 | 41424061 | Zm4 | 73598863 | 73598954 | 91   | 92   |
| Sb7 | 43248702 | 43251499 | Zm4 | 74060115 | 74062902 | 2798 | 2788 |
| Sb7 | 43252948 | 43253056 | Zm4 | 74064163 | 74064272 | 109  | 110  |
| Sb7 | 43747901 | 43748748 | Zm4 | 74229158 | 74230012 | 848  | 855  |
| Sb7 | 43748817 | 43749197 | Zm4 | 74230087 | 74230470 | 381  | 384  |
| Sb7 | 43753484 | 43753679 | Zm4 | 74235214 | 74235411 | 196  | 198  |
| Sb7 | 43759092 | 43759457 | Zm4 | 74235542 | 74235907 | 366  | 366  |
| Sb7 | 43770103 | 43770291 | Zm4 | 74238225 | 74238412 | 189  | 188  |
| Sb7 | 43770477 | 43770769 | Zm4 | 74238593 | 74238878 | 293  | 286  |
| Sb7 | 43771776 | 43771924 | Zm4 | 74239296 | 74239439 | 149  | 144  |
| Sb7 | 43771992 | 43772640 | Zm4 | 74239473 | 74240133 | 649  | 661  |
| Sb7 | 43746242 | 43746367 | Zm4 | 74254305 | 74254432 | 126  | 128  |
| Sb7 | 43746110 | 43746183 | Zm4 | 74254467 | 74254540 | 74   | 74   |
| Sb7 | 43743432 | 43743679 | Zm4 | 74255265 | 74255513 | 248  | 249  |
| Sb7 | 43743173 | 43743428 | Zm4 | 74259792 | 74260047 | 256  | 256  |
| Sb7 | 43742766 | 43742806 | Zm4 | 74267547 | 74267587 | 41   | 41   |
| Sb7 | 43742341 | 43742606 | Zm4 | 74267756 | 74268019 | 266  | 264  |
| Sb7 | 44967517 | 44968754 | Zm4 | 74350143 | 74351430 | 1238 | 1288 |
| Sb7 | 44967310 | 44967431 | Zm4 | 74351541 | 74351670 | 122  | 130  |
| Sb7 | 44967198 | 44967257 | Zm4 | 74351702 | 74351761 | 60   | 60   |
| Sb7 | 44966977 | 44967074 | Zm4 | 74352030 | 74352128 | 98   | 99   |
| Sb7 | 44966728 | 44966837 | Zm4 | 74352218 | 74352327 | 110  | 110  |
| Sb7 | 44966526 | 44966621 | Zm4 | 74352407 | 74352502 | 96   | 96   |

|     |          |          |     |           |           |     |     |
|-----|----------|----------|-----|-----------|-----------|-----|-----|
| Sb7 | 44966249 | 44966374 | Zm4 | 74352642  | 74352767  | 126 | 126 |
| Sb7 | 44965987 | 44966122 | Zm4 | 74352868  | 74353010  | 136 | 143 |
| Sb7 | 44965582 | 44965719 | Zm4 | 74353250  | 74353394  | 138 | 145 |
| Sb7 | 44965031 | 44965129 | Zm4 | 74353936  | 74354034  | 99  | 99  |
| Sb7 | 44956392 | 44956588 | Zm4 | 74356486  | 74356682  | 197 | 197 |
| Sb7 | 20734374 | 20734441 | Zm4 | 74820855  | 74820913  | 68  | 59  |
| Sb7 | 20737401 | 20737472 | Zm4 | 74821199  | 74821242  | 72  | 44  |
| Sb7 | 20737971 | 20738069 | Zm4 | 74821750  | 74821843  | 99  | 94  |
| Sb7 | 20738222 | 20738329 | Zm4 | 74822046  | 74822108  | 108 | 63  |
| Sb7 | 35914124 | 35914180 | Zm4 | 79882231  | 79882287  | 57  | 57  |
| Sb7 | 35912785 | 35912861 | Zm4 | 79883523  | 79883570  | 77  | 48  |
| Sb7 | 35912329 | 35912404 | Zm4 | 79886877  | 79886943  | 76  | 67  |
| Sb7 | 44475072 | 44475241 | Zm4 | 155158556 | 155158726 | 170 | 171 |
| Sb7 | 36933891 | 36934152 | Zm4 | 182115723 | 182115984 | 262 | 262 |
| Sb7 | 36934297 | 36934359 | Zm4 | 182116176 | 182116238 | 63  | 63  |
| Sb7 | 36934441 | 36934683 | Zm4 | 182124732 | 182124959 | 243 | 228 |
| Sb7 | 39680169 | 39680297 | Zm4 | 200947055 | 200947115 | 129 | 61  |
| Sb7 | 39679695 | 39680032 | Zm4 | 200947326 | 200947601 | 338 | 276 |
| Sb7 | 39673139 | 39673227 | Zm4 | 200948663 | 200948751 | 89  | 89  |
| Sb7 | 40388460 | 40388557 | Zm4 | 202140027 | 202140126 | 98  | 100 |
| Sb7 | 41440855 | 41440935 | Zm4 | 203774016 | 203774096 | 81  | 81  |
| Sb7 | 39674296 | 39674352 | Zm5 | 4655463   | 4655502   | 57  | 40  |
| Sb7 | 36092703 | 36092773 | Zm5 | 12627859  | 12627929  | 71  | 71  |
| Sb7 | 22397029 | 22397367 | Zm5 | 20859167  | 20859502  | 339 | 336 |
| Sb7 | 22353098 | 22353436 | Zm5 | 20859167  | 20859502  | 339 | 336 |
| Sb7 | 22353444 | 22353508 | Zm5 | 20859823  | 20859887  | 65  | 65  |

|     |          |          |     |           |           |     |     |
|-----|----------|----------|-----|-----------|-----------|-----|-----|
| Sb7 | 25584919 | 25585037 | Zm5 | 88292481  | 88292599  | 119 | 119 |
| Sb7 | 40006287 | 40006359 | Zm5 | 93743908  | 93743980  | 73  | 73  |
| Sb7 | 26432831 | 26432900 | Zm5 | 160097467 | 160097518 | 70  | 52  |
| Sb7 | 36442472 | 36442681 | Zm5 | 193162771 | 193162981 | 210 | 211 |
| Sb7 | 36442257 | 36442416 | Zm5 | 193163016 | 193163175 | 160 | 160 |
| Sb7 | 36441716 | 36441927 | Zm5 | 193197053 | 193197174 | 212 | 122 |
| Sb7 | 36441486 | 36441613 | Zm5 | 193197299 | 193197419 | 128 | 121 |
| Sb7 | 22904147 | 22904349 | Zm5 | 197434139 | 197434340 | 203 | 202 |
| Sb7 | 36105612 | 36105723 | Zm5 | 203240027 | 203240138 | 112 | 112 |
| Sb7 | 37855509 | 37855614 | Zm5 | 203447603 | 203447708 | 106 | 106 |
| Sb7 | 37855724 | 37855828 | Zm5 | 203448366 | 203448470 | 105 | 105 |
| Sb7 | 25702707 | 25702995 | Zm5 | 204946921 | 204947210 | 289 | 290 |
| Sb7 | 40455660 | 40455864 | Zm5 | 211880837 | 211881039 | 205 | 203 |
| Sb7 | 40456566 | 40457030 | Zm5 | 211882304 | 211882750 | 465 | 447 |
| Sb7 | 37763758 | 37763856 | Zm6 | 17595099  | 17595201  | 99  | 103 |
| Sb7 | 36750697 | 36750740 | Zm6 | 28227556  | 28227599  | 44  | 44  |
| Sb7 | 22189434 | 22189730 | Zm6 | 43289711  | 43290004  | 297 | 294 |
| Sb7 | 22189263 | 22189421 | Zm6 | 43290046  | 43290200  | 159 | 155 |
| Sb7 | 36034495 | 36034582 | Zm6 | 50478992  | 50479033  | 88  | 42  |
| Sb7 | 36034680 | 36034894 | Zm6 | 50479178  | 50479389  | 215 | 212 |
| Sb7 | 40914198 | 40914336 | Zm6 | 125134157 | 125134297 | 139 | 141 |
| Sb7 | 40912696 | 40912774 | Zm6 | 125134685 | 125134763 | 79  | 79  |
| Sb7 | 38644287 | 38644343 | Zm6 | 155815066 | 155815122 | 57  | 57  |
| Sb7 | 43432682 | 43432759 | Zm6 | 157940291 | 157940368 | 78  | 78  |
| Sb7 | 43432987 | 43433053 | Zm6 | 157940631 | 157940696 | 67  | 66  |
| Sb7 | 37989018 | 37989074 | Zm6 | 161824949 | 161825005 | 57  | 57  |



|     |          |          |     |           |           |     |     |
|-----|----------|----------|-----|-----------|-----------|-----|-----|
| Sb7 | 39555265 | 39555316 | Zm6 | 165182293 | 165182344 | 52  | 52  |
| Sb7 | 42759866 | 42760007 | Zm7 | 22943421  | 22943561  | 142 | 141 |
| Sb7 | 42760010 | 42760281 | Zm7 | 22943760  | 22944033  | 272 | 274 |
| Sb7 | 42760364 | 42760521 | Zm7 | 22944091  | 22944248  | 158 | 158 |
| Sb7 | 21454740 | 21454812 | Zm7 | 35440380  | 35440452  | 73  | 73  |
| Sb7 | 44474648 | 44474774 | Zm7 | 76563377  | 76563503  | 127 | 127 |
| Sb7 | 44472971 | 44473055 | Zm7 | 76563949  | 76564033  | 85  | 85  |
| Sb7 | 37781019 | 37781198 | Zm7 | 119275145 | 119275324 | 180 | 180 |
| Sb7 | 37780598 | 37780845 | Zm7 | 119275536 | 119275783 | 248 | 248 |
| Sb7 | 21345564 | 21345717 | Zm7 | 159614057 | 159614208 | 154 | 152 |
| Sb7 | 40016953 | 40017018 | Zm7 | 160610492 | 160610557 | 66  | 66  |
| Sb7 | 22353766 | 22353924 | Zm7 | 162529397 | 162529521 | 159 | 125 |
| Sb7 | 22397694 | 22397823 | Zm7 | 162529426 | 162529521 | 130 | 96  |
| Sb7 | 36874316 | 36874443 | Zm7 | 165351189 | 165351312 | 128 | 124 |
| Sb7 | 44474802 | 44474879 | Zm7 | 168185228 | 168185305 | 78  | 78  |
| Sb7 | 37854624 | 37854691 | Zm8 | 13746891  | 13746958  | 68  | 68  |
| Sb7 | 36846850 | 36846906 | Zm8 | 52658493  | 52658549  | 57  | 57  |
| Sb7 | 44782225 | 44782343 | Zm8 | 77788080  | 77788196  | 119 | 117 |
| Sb7 | 22795298 | 22795372 | Zm8 | 125531716 | 125531790 | 75  | 75  |
| Sb7 | 41604894 | 41604966 | Zm8 | 157901091 | 157901163 | 73  | 73  |
| Sb7 | 38977439 | 38977499 | Zm8 | 165844940 | 165845000 | 61  | 61  |
| Sb7 | 36527040 | 36527107 | Zm9 | 38298202  | 38298269  | 68  | 68  |
| Sb7 | 37017662 | 37017912 | Zm9 | 38298202  | 38298449  | 251 | 248 |
| Sb7 | 37014671 | 37014753 | Zm9 | 38298467  | 38298549  | 83  | 83  |
| Sb7 | 36526883 | 36527021 | Zm9 | 38298414  | 38298552  | 139 | 139 |
| Sb7 | 35760421 | 35760493 | Zm9 | 61497311  | 61497383  | 73  | 73  |

|     |          |          |     |           |           |     |     |
|-----|----------|----------|-----|-----------|-----------|-----|-----|
| Sb7 | 35460531 | 35460603 | Zm9 | 61497311  | 61497383  | 73  | 73  |
| Sb7 | 26969212 | 26969287 | Zm9 | 105111821 | 105111896 | 76  | 76  |
| Sb7 | 39555395 | 39555488 | Zm9 | 110498317 | 110498410 | 94  | 94  |
| Sb8 | 32591812 | 32591876 | Zm1 | 9885348   | 9885412   | 65  | 65  |
| Sb8 | 17865290 | 17865519 | Zm1 | 37278771  | 37278991  | 230 | 221 |
| Sb8 | 17865525 | 17865709 | Zm1 | 37279430  | 37279598  | 185 | 169 |
| Sb8 | 29649161 | 29649235 | Zm1 | 55184880  | 55184954  | 75  | 75  |
| Sb8 | 30613310 | 30613491 | Zm1 | 89099601  | 89099782  | 182 | 182 |
| Sb8 | 26135829 | 26135897 | Zm1 | 144754533 | 144754601 | 69  | 69  |
| Sb8 | 26136030 | 26136427 | Zm1 | 144754719 | 144755109 | 398 | 391 |
| Sb8 | 26136459 | 26136639 | Zm1 | 144755739 | 144755912 | 181 | 174 |
| Sb8 | 26136642 | 26136713 | Zm1 | 144756142 | 144756213 | 72  | 72  |
| Sb8 | 26136719 | 26137316 | Zm1 | 144756336 | 144756926 | 598 | 591 |
| Sb8 | 26155123 | 26155641 | Zm1 | 144767099 | 144767607 | 519 | 509 |
| Sb8 | 26156447 | 26156749 | Zm1 | 144768649 | 144768882 | 303 | 234 |
| Sb8 | 26156821 | 26156998 | Zm1 | 144769020 | 144769193 | 178 | 174 |
| Sb8 | 26157348 | 26157764 | Zm1 | 144769464 | 144769850 | 417 | 387 |
| Sb8 | 26157778 | 26157996 | Zm1 | 144770141 | 144770324 | 219 | 184 |
| Sb8 | 26158065 | 26158316 | Zm1 | 144770393 | 144770644 | 252 | 252 |
| Sb8 | 26158494 | 26158666 | Zm1 | 144770850 | 144771027 | 173 | 178 |
| Sb8 | 26171719 | 26172034 | Zm1 | 144779804 | 144780120 | 316 | 317 |
| Sb8 | 26172058 | 26172461 | Zm1 | 144780501 | 144780913 | 404 | 413 |
| Sb8 | 26172559 | 26172985 | Zm1 | 144780962 | 144781388 | 427 | 427 |
| Sb8 | 26173502 | 26173562 | Zm1 | 144781898 | 144781958 | 61  | 61  |
| Sb8 | 26173820 | 26173892 | Zm1 | 144781993 | 144782053 | 73  | 61  |
| Sb8 | 26173897 | 26174522 | Zm1 | 144782102 | 144782702 | 626 | 601 |

|     |          |          |      |           |           |      |      |
|-----|----------|----------|------|-----------|-----------|------|------|
| Sb8 | 17993571 | 17993640 | Zm1  | 145423309 | 145423378 | 70   | 70   |
| Sb8 | 17993092 | 17993151 | Zm1  | 145423541 | 145423598 | 60   | 58   |
| Sb8 | 35970108 | 35970175 | Zm1  | 170440306 | 170440373 | 68   | 68   |
| Sb8 | 35970487 | 35970543 | Zm1  | 170440932 | 170440988 | 57   | 57   |
| Sb8 | 35970567 | 35971355 | Zm1  | 170441034 | 170441794 | 789  | 761  |
| Sb8 | 35971359 | 35971550 | Zm1  | 170441857 | 170442048 | 192  | 192  |
| Sb8 | 34901866 | 34901926 | Zm1  | 172058130 | 172058190 | 61   | 61   |
| Sb8 | 30541338 | 30541436 | Zm1  | 209239087 | 209239185 | 99   | 99   |
| Sb8 | 27345938 | 27345990 | Zm1  | 237920553 | 237920605 | 53   | 53   |
| Sb8 | 27355684 | 27355840 | Zm1  | 261267333 | 261267491 | 157  | 159  |
| Sb8 | 31149493 | 31149561 | Zm1  | 275113609 | 275113677 | 69   | 69   |
| Sb8 | 32230107 | 32230159 | Zm10 | 790339    | 790391    | 53   | 53   |
| Sb8 | 32229840 | 32229957 | Zm10 | 790528    | 790645    | 118  | 118  |
| Sb8 | 27868981 | 27869126 | Zm10 | 12227593  | 12227735  | 146  | 143  |
| Sb8 | 27868229 | 27868738 | Zm10 | 12227982  | 12228486  | 510  | 505  |
| Sb8 | 27867195 | 27867337 | Zm10 | 12229369  | 12229511  | 143  | 143  |
| Sb8 | 27866388 | 27866561 | Zm10 | 12245804  | 12245971  | 174  | 168  |
| Sb8 | 27823023 | 27823073 | Zm10 | 12246988  | 12247038  | 51   | 51   |
| Sb8 | 27822743 | 27822902 | Zm10 | 12247062  | 12247224  | 160  | 163  |
| Sb8 | 27822402 | 27822464 | Zm10 | 12280366  | 12280428  | 63   | 63   |
| Sb8 | 27822118 | 27822180 | Zm10 | 12280366  | 12280428  | 63   | 63   |
| Sb8 | 27421610 | 27421705 | Zm10 | 12411008  | 12411106  | 96   | 99   |
| Sb8 | 27420528 | 27421571 | Zm10 | 12411122  | 12412179  | 1044 | 1058 |
| Sb8 | 27420238 | 27420472 | Zm10 | 12412185  | 12412423  | 235  | 239  |
| Sb8 | 27419620 | 27420143 | Zm10 | 12412652  | 12413184  | 524  | 533  |
| Sb8 | 27419137 | 27419238 | Zm10 | 12413566  | 12413667  | 102  | 102  |

|     |          |          |      |          |          |     |     |
|-----|----------|----------|------|----------|----------|-----|-----|
| Sb8 | 31037447 | 31037508 | Zm10 | 12440828 | 12440889 | 62  | 62  |
| Sb8 | 31035556 | 31035705 | Zm10 | 12441862 | 12442011 | 150 | 150 |
| Sb8 | 31035182 | 31035262 | Zm10 | 12442382 | 12442462 | 81  | 81  |
| Sb8 | 24306735 | 24306807 | Zm10 | 12805176 | 12805245 | 73  | 70  |
| Sb8 | 24304047 | 24304093 | Zm10 | 12812291 | 12812337 | 47  | 47  |
| Sb8 | 24302304 | 24302367 | Zm10 | 12814641 | 12814704 | 64  | 64  |
| Sb8 | 25628172 | 25628337 | Zm10 | 12981973 | 12982142 | 166 | 170 |
| Sb8 | 25628437 | 25628642 | Zm10 | 12982246 | 12982443 | 206 | 198 |
| Sb8 | 25628940 | 25629105 | Zm10 | 12982820 | 12982988 | 166 | 169 |
| Sb8 | 25629330 | 25629576 | Zm10 | 12983256 | 12983503 | 247 | 248 |
| Sb8 | 25629629 | 25629914 | Zm10 | 12983583 | 12983869 | 286 | 287 |
| Sb8 | 25629995 | 25630058 | Zm10 | 12983995 | 12984058 | 64  | 64  |
| Sb8 | 25630293 | 25630971 | Zm10 | 12984337 | 12985021 | 679 | 685 |
| Sb8 | 25631045 | 25631225 | Zm10 | 12985020 | 12985203 | 181 | 184 |
| Sb8 | 25632021 | 25632229 | Zm10 | 12985454 | 12985659 | 209 | 206 |
| Sb8 | 25632292 | 25632477 | Zm10 | 12985708 | 12985901 | 186 | 194 |
| Sb8 | 25632534 | 25632718 | Zm10 | 12986081 | 12986264 | 185 | 184 |
| Sb8 | 25634377 | 25634481 | Zm10 | 12987779 | 12987888 | 105 | 110 |
| Sb8 | 25634509 | 25634601 | Zm10 | 12987889 | 12987981 | 93  | 93  |
| Sb8 | 25634633 | 25634839 | Zm10 | 12987991 | 12988197 | 207 | 207 |
| Sb8 | 25634931 | 25635170 | Zm10 | 12988258 | 12988497 | 240 | 240 |
| Sb8 | 25635330 | 25635376 | Zm10 | 12988624 | 12988670 | 47  | 47  |
| Sb8 | 32330014 | 32330093 | Zm10 | 13033202 | 13033283 | 80  | 82  |
| Sb8 | 32329419 | 32329806 | Zm10 | 13062430 | 13062817 | 388 | 388 |
| Sb8 | 32328323 | 32329195 | Zm10 | 13062814 | 13063696 | 873 | 883 |
| Sb8 | 32326913 | 32326997 | Zm10 | 13064912 | 13064996 | 85  | 85  |

|     |          |          |      |          |          |     |     |
|-----|----------|----------|------|----------|----------|-----|-----|
| Sb8 | 32325810 | 32326311 | Zm10 | 13065111 | 13065624 | 502 | 514 |
| Sb8 | 32321862 | 32322199 | Zm10 | 13072867 | 13073211 | 338 | 345 |
| Sb8 | 32321705 | 32321824 | Zm10 | 13073240 | 13073356 | 120 | 117 |
| Sb8 | 32321403 | 32321525 | Zm10 | 13073801 | 13073928 | 123 | 128 |
| Sb8 | 32320226 | 32320987 | Zm10 | 13073953 | 13074698 | 762 | 746 |
| Sb8 | 32319864 | 32320193 | Zm10 | 13074699 | 13075040 | 330 | 342 |
| Sb8 | 32319423 | 32319862 | Zm10 | 13075067 | 13075513 | 440 | 447 |
| Sb8 | 32319263 | 32319353 | Zm10 | 13077605 | 13077694 | 91  | 90  |
| Sb8 | 32313415 | 32313585 | Zm10 | 13077776 | 13077945 | 171 | 170 |
| Sb8 | 32312669 | 32313303 | Zm10 | 13078034 | 13078673 | 635 | 640 |
| Sb8 | 32309987 | 32310147 | Zm10 | 13079021 | 13079189 | 161 | 169 |
| Sb8 | 32309769 | 32309957 | Zm10 | 13079237 | 13079421 | 189 | 185 |
| Sb8 | 32309606 | 32309742 | Zm10 | 13079540 | 13079669 | 137 | 130 |
| Sb8 | 32309019 | 32309210 | Zm10 | 13079916 | 13080106 | 192 | 191 |
| Sb8 | 32308659 | 32308978 | Zm10 | 13080178 | 13080500 | 320 | 323 |
| Sb8 | 32308524 | 32308590 | Zm10 | 13080583 | 13080649 | 67  | 67  |
| Sb8 | 32307910 | 32308493 | Zm10 | 13080677 | 13081266 | 584 | 590 |
| Sb8 | 34898560 | 34898632 | Zm10 | 15033443 | 15033515 | 73  | 73  |
| Sb8 | 34900222 | 34900342 | Zm10 | 15034694 | 15034812 | 121 | 119 |
| Sb8 | 25521280 | 25521591 | Zm10 | 15266587 | 15266900 | 312 | 314 |
| Sb8 | 25520974 | 25521258 | Zm10 | 15266950 | 15267243 | 285 | 294 |
| Sb8 | 25520370 | 25520433 | Zm10 | 15267406 | 15267469 | 64  | 64  |
| Sb8 | 25519281 | 25520233 | Zm10 | 15267467 | 15268417 | 953 | 951 |
| Sb8 | 25518366 | 25519109 | Zm10 | 15268507 | 15269261 | 744 | 755 |
| Sb8 | 25512524 | 25512709 | Zm10 | 15269288 | 15269470 | 186 | 183 |
| Sb8 | 25511564 | 25511639 | Zm10 | 15270065 | 15270140 | 76  | 76  |

|     |          |          |      |          |          |      |      |
|-----|----------|----------|------|----------|----------|------|------|
| Sb8 | 25462942 | 25462989 | Zm10 | 15279451 | 15279498 | 48   | 48   |
| Sb8 | 25462995 | 25463400 | Zm10 | 15279911 | 15280245 | 406  | 335  |
| Sb8 | 25470647 | 25471411 | Zm10 | 15287276 | 15288044 | 765  | 769  |
| Sb8 | 25471436 | 25471853 | Zm10 | 15288134 | 15288547 | 418  | 414  |
| Sb8 | 25502326 | 25502714 | Zm10 | 15292501 | 15292898 | 389  | 398  |
| Sb8 | 25502728 | 25502763 | Zm10 | 15293955 | 15293990 | 36   | 36   |
| Sb8 | 25502848 | 25503244 | Zm10 | 15294524 | 15294919 | 397  | 396  |
| Sb8 | 25454038 | 25454115 | Zm10 | 15298502 | 15298579 | 78   | 78   |
| Sb8 | 25453344 | 25453662 | Zm10 | 15299265 | 15299579 | 319  | 315  |
| Sb8 | 25450349 | 25450586 | Zm10 | 15299780 | 15300018 | 238  | 239  |
| Sb8 | 28290311 | 28290350 | Zm10 | 20152068 | 20152102 | 40   | 35   |
| Sb8 | 34006002 | 34006204 | Zm10 | 20756480 | 20756682 | 203  | 203  |
| Sb8 | 34006253 | 34006485 | Zm10 | 20756814 | 20757045 | 233  | 232  |
| Sb8 | 34006668 | 34006783 | Zm10 | 20757575 | 20757633 | 116  | 59   |
| Sb8 | 34007474 | 34007553 | Zm10 | 20758266 | 20758344 | 80   | 79   |
| Sb8 | 34007652 | 34007723 | Zm10 | 20758448 | 20758519 | 72   | 72   |
| Sb8 | 34007852 | 34007882 | Zm10 | 20758689 | 20758719 | 31   | 31   |
| Sb8 | 30517454 | 30518419 | Zm10 | 21012233 | 21013189 | 966  | 957  |
| Sb8 | 30518604 | 30519525 | Zm10 | 21013374 | 21014277 | 922  | 904  |
| Sb8 | 30519656 | 30519784 | Zm10 | 21014674 | 21014798 | 129  | 125  |
| Sb8 | 30520040 | 30520109 | Zm10 | 21015018 | 21015087 | 70   | 70   |
| Sb8 | 30521891 | 30521970 | Zm10 | 21015716 | 21015795 | 80   | 80   |
| Sb8 | 30522025 | 30522097 | Zm10 | 21015860 | 21015932 | 73   | 73   |
| Sb8 | 30522356 | 30523639 | Zm10 | 21017761 | 21019028 | 1284 | 1268 |
| Sb8 | 30523740 | 30524168 | Zm10 | 21019133 | 21019571 | 429  | 439  |
| Sb8 | 30524256 | 30524391 | Zm10 | 21019651 | 21019785 | 136  | 135  |

|     |          |          |      |          |          |      |      |
|-----|----------|----------|------|----------|----------|------|------|
| Sb8 | 30524471 | 30524881 | Zm10 | 21019828 | 21020239 | 411  | 412  |
| Sb8 | 30530260 | 30530338 | Zm10 | 21022123 | 21022201 | 79   | 79   |
| Sb8 | 30538667 | 30539365 | Zm10 | 21029864 | 21030549 | 699  | 686  |
| Sb8 | 30539487 | 30539828 | Zm10 | 21030830 | 21031163 | 342  | 334  |
| Sb8 | 30539857 | 30540272 | Zm10 | 21031218 | 21031634 | 416  | 417  |
| Sb8 | 30540289 | 30540668 | Zm10 | 21031957 | 21032338 | 380  | 382  |
| Sb8 | 30545514 | 30545660 | Zm10 | 21032622 | 21032764 | 147  | 143  |
| Sb8 | 30545791 | 30546599 | Zm10 | 21032990 | 21033813 | 809  | 824  |
| Sb8 | 30561224 | 30561692 | Zm10 | 21045738 | 21046206 | 469  | 469  |
| Sb8 | 30564531 | 30564764 | Zm10 | 21050257 | 21050490 | 234  | 234  |
| Sb8 | 30564964 | 30565300 | Zm10 | 21050698 | 21051035 | 337  | 338  |
| Sb8 | 30568830 | 30569168 | Zm10 | 21051116 | 21051451 | 339  | 336  |
| Sb8 | 30569208 | 30570516 | Zm10 | 21051460 | 21052730 | 1309 | 1271 |
| Sb8 | 30570531 | 30570653 | Zm10 | 21052768 | 21052883 | 123  | 116  |
| Sb8 | 30579247 | 30580023 | Zm10 | 21055324 | 21056103 | 777  | 780  |
| Sb8 | 30581193 | 30581553 | Zm10 | 21056542 | 21056891 | 361  | 350  |
| Sb8 | 30581677 | 30581762 | Zm10 | 21057063 | 21057148 | 86   | 86   |
| Sb8 | 17402753 | 17402820 | Zm10 | 21165083 | 21165150 | 68   | 68   |
| Sb8 | 17385387 | 17385515 | Zm10 | 21253965 | 21254082 | 129  | 118  |
| Sb8 | 17371438 | 17371565 | Zm10 | 21432838 | 21432968 | 128  | 131  |
| Sb8 | 17370999 | 17371390 | Zm10 | 21433236 | 21433637 | 392  | 402  |
| Sb8 | 17370630 | 17370900 | Zm10 | 21433736 | 21434006 | 271  | 271  |
| Sb8 | 17370526 | 17370625 | Zm10 | 21434035 | 21434135 | 100  | 101  |
| Sb8 | 17370323 | 17370484 | Zm10 | 21434145 | 21434305 | 162  | 161  |
| Sb8 | 17364839 | 17364937 | Zm10 | 21443832 | 21443891 | 99   | 60   |
| Sb8 | 17364622 | 17364694 | Zm10 | 21444039 | 21444108 | 73   | 70   |

|     |          |          |      |           |           |     |     |
|-----|----------|----------|------|-----------|-----------|-----|-----|
| Sb8 | 17364437 | 17364557 | Zm10 | 21444174  | 21444293  | 121 | 120 |
| Sb8 | 18231790 | 18231884 | Zm10 | 21545827  | 21545921  | 95  | 95  |
| Sb8 | 18028558 | 18028625 | Zm10 | 21594593  | 21594659  | 68  | 67  |
| Sb8 | 18028416 | 18028476 | Zm10 | 21594736  | 21594796  | 61  | 61  |
| Sb8 | 18027908 | 18028300 | Zm10 | 21594888  | 21595262  | 393 | 375 |
| Sb8 | 18026833 | 18027277 | Zm10 | 21595928  | 21596291  | 445 | 364 |
| Sb8 | 18026724 | 18026808 | Zm10 | 21596292  | 21596376  | 85  | 85  |
| Sb8 | 18026371 | 18026599 | Zm10 | 21596484  | 21596702  | 229 | 219 |
| Sb8 | 17950917 | 17951273 | Zm10 | 21714420  | 21714752  | 357 | 333 |
| Sb8 | 17951475 | 17952300 | Zm10 | 21716093  | 21716906  | 826 | 814 |
| Sb8 | 18025483 | 18025572 | Zm10 | 21755575  | 21755663  | 90  | 89  |
| Sb8 | 17954650 | 17954825 | Zm10 | 21756728  | 21756904  | 176 | 177 |
| Sb8 | 17954303 | 17954498 | Zm10 | 21756959  | 21757157  | 196 | 199 |
| Sb8 | 17953798 | 17954162 | Zm10 | 21757319  | 21757680  | 365 | 362 |
| Sb8 | 17953067 | 17953311 | Zm10 | 21757955  | 21758196  | 245 | 242 |
| Sb8 | 17952370 | 17952975 | Zm10 | 21758428  | 21759038  | 606 | 611 |
| Sb8 | 18764687 | 18764831 | Zm10 | 21766837  | 21766966  | 145 | 130 |
| Sb8 | 18765808 | 18765903 | Zm10 | 21767983  | 21768044  | 96  | 62  |
| Sb8 | 18767083 | 18767212 | Zm10 | 21769206  | 21769333  | 130 | 128 |
| Sb8 | 18767583 | 18767830 | Zm10 | 21769708  | 21769924  | 248 | 217 |
| Sb8 | 18767973 | 18768108 | Zm10 | 21770067  | 21770202  | 136 | 136 |
| Sb8 | 19294268 | 19294410 | Zm10 | 21910249  | 21910391  | 143 | 143 |
| Sb8 | 19292444 | 19292849 | Zm10 | 21921466  | 21921874  | 406 | 409 |
| Sb8 | 29649648 | 29649932 | Zm10 | 124884100 | 124884387 | 285 | 288 |
| Sb8 | 30856906 | 30856955 | Zm2  | 1959659   | 1959708   | 50  | 50  |
| Sb8 | 19254602 | 19254715 | Zm2  | 7263823   | 7263936   | 114 | 114 |



|     |          |          |     |           |           |     |     |
|-----|----------|----------|-----|-----------|-----------|-----|-----|
| Sb8 | 19254853 | 19254932 | Zm2 | 7264072   | 7264151   | 80  | 80  |
| Sb8 | 19255803 | 19255907 | Zm2 | 7264912   | 7265012   | 105 | 101 |
| Sb8 | 26245460 | 26245573 | Zm2 | 17471752  | 17471867  | 114 | 116 |
| Sb8 | 32282273 | 32282360 | Zm2 | 36436497  | 36436581  | 88  | 85  |
| Sb8 | 32282408 | 32282555 | Zm2 | 36437309  | 36437454  | 148 | 146 |
| Sb8 | 32282709 | 32282776 | Zm2 | 36438445  | 36438513  | 68  | 69  |
| Sb8 | 32282790 | 32282944 | Zm2 | 36438615  | 36438768  | 155 | 154 |
| Sb8 | 25216599 | 25216739 | Zm2 | 43658909  | 43659052  | 141 | 144 |
| Sb8 | 27440672 | 27440764 | Zm2 | 184713395 | 184713487 | 93  | 93  |
| Sb8 | 18480842 | 18481009 | Zm2 | 195684245 | 195684426 | 168 | 182 |
| Sb8 | 19248022 | 19248081 | Zm2 | 210821648 | 210821707 | 60  | 60  |
| Sb8 | 28289714 | 28289890 | Zm2 | 222055521 | 222055702 | 177 | 182 |
| Sb8 | 18040200 | 18040284 | Zm2 | 231080469 | 231080553 | 85  | 85  |
| Sb8 | 18040333 | 18040512 | Zm2 | 231080975 | 231081157 | 180 | 183 |
| Sb8 | 18040719 | 18040792 | Zm2 | 231081332 | 231081405 | 74  | 74  |
| Sb8 | 18040903 | 18041092 | Zm2 | 231082098 | 231082289 | 190 | 192 |
| Sb8 | 19109897 | 19110219 | Zm3 | 8613636   | 8613959   | 323 | 324 |
| Sb8 | 29653070 | 29653269 | Zm3 | 10304576  | 10304770  | 200 | 195 |
| Sb8 | 30844031 | 30844116 | Zm3 | 20059064  | 20059143  | 86  | 80  |
| Sb8 | 32299890 | 32299994 | Zm3 | 28482146  | 28482249  | 105 | 104 |
| Sb8 | 25153262 | 25153306 | Zm3 | 52279242  | 52279281  | 45  | 40  |
| Sb8 | 25133010 | 25133139 | Zm3 | 52302350  | 52302476  | 130 | 127 |
| Sb8 | 17263270 | 17263368 | Zm3 | 82162467  | 82162564  | 99  | 98  |
| Sb8 | 17262166 | 17262486 | Zm3 | 82163076  | 82163289  | 321 | 214 |
| Sb8 | 17261848 | 17262019 | Zm3 | 82163316  | 82163484  | 172 | 169 |
| Sb8 | 17261262 | 17261841 | Zm3 | 82163519  | 82164090  | 580 | 572 |

|     |          |          |     |          |          |      |      |
|-----|----------|----------|-----|----------|----------|------|------|
| Sb8 | 17260288 | 17261172 | Zm3 | 82164180 | 82165036 | 885  | 857  |
| Sb8 | 17254926 | 17254987 | Zm3 | 82165858 | 82165919 | 62   | 62   |
| Sb8 | 17249431 | 17249519 | Zm3 | 82166274 | 82166362 | 89   | 89   |
| Sb8 | 17249155 | 17249419 | Zm3 | 82166655 | 82166911 | 265  | 257  |
| Sb8 | 17249041 | 17249095 | Zm3 | 82166975 | 82167028 | 55   | 54   |
| Sb8 | 17247415 | 17247696 | Zm3 | 82168314 | 82168584 | 282  | 271  |
| Sb8 | 17246175 | 17246974 | Zm3 | 82168996 | 82169803 | 800  | 808  |
| Sb8 | 17245268 | 17245383 | Zm3 | 82170569 | 82170687 | 116  | 119  |
| Sb8 | 34007332 | 34007465 | Zm3 | 83684180 | 83684310 | 134  | 131  |
| Sb8 | 34008201 | 34008266 | Zm3 | 83685035 | 83685071 | 66   | 37   |
| Sb8 | 24307372 | 24307662 | Zm3 | 83890438 | 83890727 | 291  | 290  |
| Sb8 | 24306995 | 24307051 | Zm3 | 83890934 | 83890984 | 57   | 51   |
| Sb8 | 24306652 | 24306732 | Zm3 | 83891222 | 83891302 | 81   | 81   |
| Sb8 | 30621796 | 30621916 | Zm3 | 84774155 | 84774275 | 121  | 121  |
| Sb8 | 30620894 | 30620975 | Zm3 | 84775313 | 84775392 | 82   | 80   |
| Sb8 | 30618145 | 30618234 | Zm3 | 84777781 | 84777855 | 90   | 75   |
| Sb8 | 34130737 | 34130942 | Zm3 | 84988283 | 84988488 | 206  | 206  |
| Sb8 | 34131014 | 34131124 | Zm3 | 84988560 | 84988670 | 111  | 111  |
| Sb8 | 34131165 | 34131338 | Zm3 | 84988671 | 84988830 | 174  | 160  |
| Sb8 | 34131343 | 34131709 | Zm3 | 84988882 | 84989245 | 367  | 364  |
| Sb8 | 34131743 | 34132064 | Zm3 | 84990076 | 84990396 | 322  | 321  |
| Sb8 | 34132132 | 34133396 | Zm3 | 84990483 | 84991746 | 1265 | 1264 |
| Sb8 | 34133706 | 34134903 | Zm3 | 84998102 | 84999289 | 1198 | 1188 |
| Sb8 | 34134922 | 34135174 | Zm3 | 84999368 | 84999619 | 253  | 252  |
| Sb8 | 34135528 | 34135932 | Zm3 | 85000070 | 85000498 | 405  | 429  |
| Sb8 | 34136087 | 34136357 | Zm3 | 85000659 | 85000935 | 271  | 277  |

|     |          |          |     |          |          |     |     |
|-----|----------|----------|-----|----------|----------|-----|-----|
| Sb8 | 34137185 | 34137650 | Zm3 | 85001174 | 85001633 | 466 | 460 |
| Sb8 | 34142878 | 34142986 | Zm3 | 85001629 | 85001740 | 109 | 112 |
| Sb8 | 34150626 | 34151428 | Zm3 | 85018867 | 85019688 | 803 | 822 |
| Sb8 | 34151684 | 34151821 | Zm3 | 85019692 | 85019829 | 138 | 138 |
| Sb8 | 34151921 | 34152064 | Zm3 | 85019934 | 85020078 | 144 | 145 |
| Sb8 | 25140908 | 25140961 | Zm3 | 85587916 | 85587952 | 54  | 37  |
| Sb8 | 34898864 | 34899052 | Zm3 | 86053128 | 86053309 | 189 | 182 |
| Sb8 | 34897801 | 34898016 | Zm3 | 86054184 | 86054365 | 216 | 182 |
| Sb8 | 35618259 | 35618978 | Zm3 | 87832446 | 87833165 | 720 | 720 |
| Sb8 | 35620741 | 35620806 | Zm3 | 87833323 | 87833390 | 66  | 68  |
| Sb8 | 35626215 | 35626596 | Zm3 | 87841293 | 87841676 | 382 | 384 |
| Sb8 | 35629651 | 35629879 | Zm3 | 87842388 | 87842613 | 229 | 226 |
| Sb8 | 35630564 | 35630786 | Zm3 | 87843294 | 87843513 | 223 | 220 |
| Sb8 | 28288697 | 28288846 | Zm3 | 88807209 | 88807356 | 150 | 148 |
| Sb8 | 28278636 | 28278695 | Zm3 | 88818858 | 88818907 | 60  | 50  |
| Sb8 | 19257815 | 19257915 | Zm3 | 95457301 | 95457358 | 101 | 58  |
| Sb8 | 19258481 | 19258582 | Zm3 | 95457916 | 95458017 | 102 | 102 |
| Sb8 | 19259407 | 19259458 | Zm3 | 95466896 | 95466947 | 52  | 52  |
| Sb8 | 19259495 | 19260254 | Zm3 | 95466950 | 95467705 | 760 | 756 |
| Sb8 | 19260645 | 19260720 | Zm3 | 95474084 | 95474151 | 76  | 68  |
| Sb8 | 19261154 | 19261557 | Zm3 | 95474595 | 95474985 | 404 | 391 |
| Sb8 | 18484615 | 18484701 | Zm3 | 95664912 | 95664998 | 87  | 87  |
| Sb8 | 18484748 | 18485086 | Zm3 | 95665036 | 95665368 | 339 | 333 |
| Sb8 | 18486965 | 18487183 | Zm3 | 95681745 | 95681963 | 219 | 219 |
| Sb8 | 18501087 | 18501680 | Zm3 | 95705763 | 95706358 | 594 | 596 |
| Sb8 | 17372261 | 17372413 | Zm3 | 95884712 | 95884862 | 153 | 151 |

|     |          |          |     |           |           |      |      |
|-----|----------|----------|-----|-----------|-----------|------|------|
| Sb8 | 17372019 | 17372215 | Zm3 | 95884867  | 95885057  | 197  | 191  |
| Sb8 | 17371753 | 17372014 | Zm3 | 95885134  | 95885364  | 262  | 231  |
| Sb8 | 17133236 | 17133295 | Zm3 | 95909245  | 95909297  | 60   | 53   |
| Sb8 | 19281576 | 19281634 | Zm3 | 95909245  | 95909297  | 59   | 53   |
| Sb8 | 19281402 | 19281439 | Zm3 | 95909449  | 95909486  | 38   | 38   |
| Sb8 | 17133574 | 17133821 | Zm3 | 95909908  | 95910162  | 248  | 255  |
| Sb8 | 17133959 | 17134008 | Zm3 | 95911265  | 95911309  | 50   | 45   |
| Sb8 | 17134161 | 17134438 | Zm3 | 95911532  | 95911747  | 278  | 216  |
| Sb8 | 17131429 | 17131948 | Zm3 | 95940769  | 95941301  | 520  | 533  |
| Sb8 | 17130256 | 17131407 | Zm3 | 95941298  | 95942427  | 1152 | 1130 |
| Sb8 | 17122968 | 17123263 | Zm3 | 95956183  | 95956478  | 296  | 296  |
| Sb8 | 17122043 | 17122902 | Zm3 | 95956674  | 95957534  | 860  | 861  |
| Sb8 | 17118259 | 17118734 | Zm3 | 95957530  | 95958014  | 476  | 485  |
| Sb8 | 17117026 | 17117646 | Zm3 | 95970350  | 95970952  | 621  | 603  |
| Sb8 | 17116778 | 17116998 | Zm3 | 95970947  | 95971166  | 221  | 220  |
| Sb8 | 17116135 | 17116727 | Zm3 | 95971193  | 95971783  | 593  | 591  |
| Sb8 | 17115989 | 17116052 | Zm3 | 95971822  | 95971885  | 64   | 64   |
| Sb8 | 30831628 | 30831745 | Zm3 | 111158355 | 111158471 | 118  | 117  |
| Sb8 | 27373590 | 27373638 | Zm3 | 169191205 | 169191253 | 49   | 49   |
| Sb8 | 27433628 | 27433686 | Zm3 | 196778693 | 196778751 | 59   | 59   |
| Sb8 | 27433738 | 27433793 | Zm3 | 196778853 | 196778908 | 56   | 56   |
| Sb8 | 32287999 | 32288112 | Zm3 | 201151220 | 201151334 | 114  | 115  |
| Sb8 | 17586958 | 17587164 | Zm3 | 218265792 | 218265993 | 207  | 202  |
| Sb8 | 18228423 | 18228486 | Zm4 | 3116093   | 3116156   | 64   | 64   |
| Sb8 | 32323431 | 32323544 | Zm4 | 150994306 | 150994419 | 114  | 114  |
| Sb8 | 31038282 | 31038419 | Zm4 | 182124856 | 182124993 | 138  | 138  |

|     |          |          |     |           |           |     |     |
|-----|----------|----------|-----|-----------|-----------|-----|-----|
| Sb8 | 30515838 | 30515889 | Zm4 | 214131888 | 214131939 | 52  | 52  |
| Sb8 | 18796981 | 18797053 | Zm4 | 216808040 | 216808109 | 73  | 70  |
| Sb8 | 18797114 | 18797236 | Zm4 | 216808192 | 216808309 | 123 | 118 |
| Sb8 | 17880194 | 17880256 | Zm4 | 232571284 | 232571346 | 63  | 63  |
| Sb8 | 31038814 | 31038888 | Zm4 | 240071625 | 240071699 | 75  | 75  |
| Sb8 | 34156837 | 34156924 | Zm4 | 241012208 | 241012295 | 88  | 88  |
| Sb8 | 24195581 | 24195698 | Zm5 | 7227560   | 7227677   | 118 | 118 |
| Sb8 | 31451999 | 31452080 | Zm5 | 7317479   | 7317560   | 82  | 82  |
| Sb8 | 31452126 | 31452259 | Zm5 | 7317662   | 7317795   | 134 | 134 |
| Sb8 | 32834283 | 32834404 | Zm5 | 58902235  | 58902356  | 122 | 122 |
| Sb8 | 26560935 | 26560991 | Zm5 | 100466344 | 100466400 | 57  | 57  |
| Sb8 | 18836360 | 18836423 | Zm5 | 159143099 | 159143161 | 64  | 63  |
| Sb8 | 26577828 | 26577860 | Zm5 | 168942116 | 168942145 | 33  | 30  |
| Sb8 | 35605394 | 35605687 | Zm5 | 170129760 | 170130061 | 294 | 302 |
| Sb8 | 25447914 | 25447961 | Zm5 | 176471912 | 176471959 | 48  | 48  |
| Sb8 | 17241085 | 17241264 | Zm5 | 178507917 | 178508098 | 180 | 182 |
| Sb8 | 17235960 | 17236008 | Zm5 | 178508183 | 178508232 | 49  | 50  |
| Sb8 | 17235672 | 17235934 | Zm5 | 178508406 | 178508660 | 263 | 255 |
| Sb8 | 17235526 | 17235600 | Zm5 | 178508766 | 178508842 | 75  | 77  |
| Sb8 | 18617872 | 18617931 | Zm5 | 187014682 | 187014741 | 60  | 60  |
| Sb8 | 18615835 | 18615924 | Zm5 | 187019709 | 187019787 | 90  | 79  |
| Sb8 | 17234948 | 17235066 | Zm5 | 203811746 | 203811864 | 119 | 119 |
| Sb8 | 30614220 | 30614576 | Zm5 | 213531028 | 213531394 | 357 | 367 |
| Sb8 | 29650642 | 29650722 | Zm6 | 34131432  | 34131511  | 81  | 80  |
| Sb8 | 30839821 | 30839936 | Zm6 | 43290049  | 43290164  | 116 | 116 |
| Sb8 | 18233283 | 18233377 | Zm6 | 100080009 | 100080103 | 95  | 95  |

|     |          |          |     |           |           |      |      |
|-----|----------|----------|-----|-----------|-----------|------|------|
| Sb8 | 18242303 | 18242397 | Zm6 | 100080009 | 100080103 | 95   | 95   |
| Sb8 | 18247430 | 18247524 | Zm6 | 100080009 | 100080103 | 95   | 95   |
| Sb8 | 30543400 | 30543457 | Zm6 | 114028165 | 114028207 | 58   | 43   |
| Sb8 | 30543471 | 30543616 | Zm6 | 114030385 | 114030527 | 146  | 143  |
| Sb8 | 18583281 | 18583691 | Zm6 | 134050764 | 134051179 | 411  | 416  |
| Sb8 | 18584923 | 18585012 | Zm6 | 134054325 | 134054410 | 90   | 86   |
| Sb8 | 18585860 | 18585952 | Zm6 | 134054406 | 134054498 | 93   | 93   |
| Sb8 | 18585972 | 18586457 | Zm6 | 134054491 | 134054975 | 486  | 485  |
| Sb8 | 18588468 | 18588725 | Zm6 | 134055586 | 134055843 | 258  | 258  |
| Sb8 | 35720497 | 35720555 | Zm7 | 1796340   | 1796398   | 59   | 59   |
| Sb8 | 18482642 | 18482769 | Zm7 | 17398454  | 17398582  | 128  | 129  |
| Sb8 | 17966758 | 17967061 | Zm7 | 61043341  | 61043649  | 304  | 309  |
| Sb8 | 17966371 | 17966670 | Zm7 | 61043688  | 61043964  | 300  | 277  |
| Sb8 | 17965619 | 17966364 | Zm7 | 61045745  | 61046478  | 746  | 734  |
| Sb8 | 17965118 | 17965486 | Zm7 | 61046525  | 61046906  | 369  | 382  |
| Sb8 | 17964496 | 17965012 | Zm7 | 61047010  | 61047519  | 517  | 510  |
| Sb8 | 17960142 | 17963256 | Zm7 | 61089039  | 61092154  | 3115 | 3116 |
| Sb8 | 17959276 | 17960105 | Zm7 | 61092532  | 61093383  | 830  | 852  |
| Sb8 | 19251246 | 19251316 | Zm7 | 143035086 | 143035156 | 71   | 71   |
| Sb8 | 30842250 | 30842315 | Zm8 | 62905767  | 62905832  | 66   | 66   |
| Sb8 | 30537800 | 30537880 | Zm8 | 127778836 | 127778916 | 81   | 81   |
| Sb8 | 30536908 | 30537006 | Zm8 | 127779558 | 127779641 | 99   | 84   |
| Sb8 | 30512143 | 30512426 | Zm8 | 127945443 | 127945722 | 284  | 280  |
| Sb8 | 17963970 | 17964021 | Zm8 | 128629732 | 128629783 | 52   | 52   |
| Sb8 | 32831791 | 32831890 | Zm8 | 151405852 | 151405952 | 100  | 101  |
| Sb8 | 32831923 | 32832261 | Zm8 | 151405996 | 151406345 | 339  | 350  |

|     |          |          |      |           |           |     |     |
|-----|----------|----------|------|-----------|-----------|-----|-----|
| Sb8 | 32832299 | 32832552 | Zm8  | 151406410 | 151406658 | 254 | 249 |
| Sb8 | 32832577 | 32832888 | Zm8  | 151407166 | 151407482 | 312 | 317 |
| Sb8 | 18481048 | 18481108 | Zm8  | 164574361 | 164574421 | 61  | 61  |
| Sb8 | 17972372 | 17972476 | Zm9  | 93250444  | 93250554  | 105 | 111 |
| Sb8 | 17972201 | 17972265 | Zm9  | 93250650  | 93250714  | 65  | 65  |
| Sb8 | 17971883 | 17971979 | Zm9  | 93250765  | 93250861  | 97  | 97  |
| Sb8 | 17971700 | 17971758 | Zm9  | 93250946  | 93251004  | 59  | 59  |
| Sb8 | 17971420 | 17971544 | Zm9  | 93251128  | 93251252  | 125 | 125 |
| Sb8 | 17970989 | 17971142 | Zm9  | 93251427  | 93251580  | 154 | 154 |
| Sb8 | 17970562 | 17970665 | Zm9  | 93251690  | 93251793  | 104 | 104 |
| Sb8 | 17970367 | 17970461 | Zm9  | 93251889  | 93251983  | 95  | 95  |
| Sb8 | 17590487 | 17590546 | Zm9  | 133091925 | 133091984 | 60  | 60  |
| Sb9 | 23180108 | 23180149 | Zm1  | 49110273  | 49110314  | 42  | 42  |
| Sb9 | 33343336 | 33343414 | Zm1  | 103995277 | 103995355 | 79  | 79  |
| Sb9 | 33344315 | 33344391 | Zm1  | 223457051 | 223457127 | 77  | 77  |
| Sb9 | 17647012 | 17647069 | Zm1  | 224635630 | 224635687 | 58  | 58  |
| Sb9 | 24654220 | 24654416 | Zm1  | 226938281 | 226938472 | 197 | 192 |
| Sb9 | 33811618 | 33812150 | Zm1  | 234075347 | 234075886 | 533 | 540 |
| Sb9 | 34209469 | 34210001 | Zm1  | 234075347 | 234075886 | 533 | 540 |
| Sb9 | 17748113 | 17748387 | Zm1  | 244243165 | 244243441 | 275 | 277 |
| Sb9 | 19514612 | 19514707 | Zm10 | 117805251 | 117805336 | 96  | 86  |
| Sb9 | 27053185 | 27053253 | Zm10 | 141295005 | 141295073 | 69  | 69  |
| Sb9 | 20703585 | 20703629 | Zm2  | 4311825   | 4311869   | 45  | 45  |
| Sb9 | 24626100 | 24626161 | Zm2  | 5821502   | 5821563   | 62  | 62  |
| Sb9 | 18934465 | 18934669 | Zm2  | 14376165  | 14376370  | 205 | 206 |
| Sb9 | 35229335 | 35229416 | Zm2  | 29095884  | 29095965  | 82  | 82  |

|     |          |          |     |           |           |     |     |
|-----|----------|----------|-----|-----------|-----------|-----|-----|
| Sb9 | 35229466 | 35229550 | Zm2 | 29096022  | 29096093  | 85  | 72  |
| Sb9 | 35229772 | 35229865 | Zm2 | 29096357  | 29096449  | 94  | 93  |
| Sb9 | 35229961 | 35230098 | Zm2 | 29096545  | 29096682  | 138 | 138 |
| Sb9 | 20934504 | 20934590 | Zm2 | 37641374  | 37641460  | 87  | 87  |
| Sb9 | 22628786 | 22628898 | Zm2 | 38040530  | 38040642  | 113 | 113 |
| Sb9 | 18765928 | 18765998 | Zm2 | 42720129  | 42720200  | 71  | 72  |
| Sb9 | 22633548 | 22633769 | Zm2 | 99475602  | 99475801  | 222 | 200 |
| Sb9 | 22634520 | 22634595 | Zm2 | 99476525  | 99476563  | 76  | 39  |
| Sb9 | 22001031 | 22001088 | Zm2 | 112836466 | 112836523 | 58  | 58  |
| Sb9 | 20068007 | 20068063 | Zm2 | 178641396 | 178641448 | 57  | 53  |
| Sb9 | 20068072 | 20068123 | Zm2 | 178641772 | 178641816 | 52  | 45  |
| Sb9 | 24615689 | 24615767 | Zm2 | 201125679 | 201125758 | 79  | 80  |
| Sb9 | 20466718 | 20466842 | Zm2 | 212279289 | 212279414 | 125 | 126 |
| Sb9 | 34075862 | 34075929 | Zm2 | 213994533 | 213994600 | 68  | 68  |
| Sb9 | 33757261 | 33757328 | Zm2 | 213994533 | 213994600 | 68  | 68  |
| Sb9 | 33468882 | 33469028 | Zm3 | 19790796  | 19790942  | 147 | 147 |
| Sb9 | 17068079 | 17068222 | Zm3 | 19790799  | 19790942  | 144 | 144 |
| Sb9 | 17808830 | 17809009 | Zm3 | 23488709  | 23488885  | 180 | 177 |
| Sb9 | 17808315 | 17808412 | Zm3 | 23490532  | 23490630  | 98  | 99  |
| Sb9 | 35217201 | 35217265 | Zm3 | 156484218 | 156484282 | 65  | 65  |
| Sb9 | 20109853 | 20109943 | Zm3 | 183063519 | 183063601 | 91  | 83  |
| Sb9 | 35218134 | 35218201 | Zm3 | 188984442 | 188984502 | 68  | 61  |
| Sb9 | 32847665 | 32847697 | Zm3 | 205422150 | 205422176 | 33  | 27  |
| Sb9 | 32847736 | 32847809 | Zm3 | 205422254 | 205422284 | 74  | 31  |
| Sb9 | 22630193 | 22630321 | Zm3 | 225544150 | 225544278 | 129 | 129 |
| Sb9 | 22630421 | 22630623 | Zm3 | 225544355 | 225544561 | 203 | 207 |



|     |          |          |     |           |           |     |     |
|-----|----------|----------|-----|-----------|-----------|-----|-----|
| Sb9 | 25678351 | 25678677 | Zm4 | 16819905  | 16820230  | 327 | 326 |
| Sb9 | 25678800 | 25679478 | Zm4 | 16820349  | 16821008  | 679 | 660 |
| Sb9 | 25680331 | 25680542 | Zm4 | 16821575  | 16821791  | 212 | 217 |
| Sb9 | 25680649 | 25680765 | Zm4 | 16822063  | 16822177  | 117 | 115 |
| Sb9 | 25680818 | 25681284 | Zm4 | 16823918  | 16824387  | 467 | 470 |
| Sb9 | 25684239 | 25684449 | Zm4 | 16827216  | 16827423  | 211 | 208 |
| Sb9 | 25684560 | 25685329 | Zm4 | 16827613  | 16828379  | 770 | 767 |
| Sb9 | 26488225 | 26488282 | Zm4 | 139911676 | 139911733 | 58  | 58  |
| Sb9 | 21476068 | 21476179 | Zm4 | 230686872 | 230686984 | 112 | 113 |
| Sb9 | 22000881 | 22000999 | Zm4 | 240071603 | 240071720 | 119 | 118 |
| Sb9 | 23464237 | 23464305 | Zm5 | 20858899  | 20858967  | 69  | 69  |
| Sb9 | 23463953 | 23464198 | Zm5 | 20859160  | 20859404  | 246 | 245 |
| Sb9 | 20929472 | 20929674 | Zm5 | 43161729  | 43161940  | 203 | 212 |
| Sb9 | 21364945 | 21365073 | Zm5 | 45857021  | 45857148  | 129 | 128 |
| Sb9 | 35260481 | 35260569 | Zm5 | 151269279 | 151269367 | 89  | 89  |
| Sb9 | 16993192 | 16993363 | Zm5 | 171395615 | 171395795 | 172 | 181 |
| Sb9 | 23495060 | 23495184 | Zm5 | 207605605 | 207605736 | 125 | 132 |
| Sb9 | 30815087 | 30815285 | Zm6 | 51156923  | 51157121  | 199 | 199 |
| Sb9 | 20472298 | 20472453 | Zm6 | 85426775  | 85426926  | 156 | 152 |
| Sb9 | 32823235 | 32823310 | Zm6 | 114021331 | 114021389 | 76  | 59  |
| Sb9 | 21367758 | 21367831 | Zm6 | 134072877 | 134072950 | 74  | 74  |
| Sb9 | 21367044 | 21367350 | Zm6 | 134073404 | 134073646 | 307 | 243 |
| Sb9 | 21366083 | 21366392 | Zm6 | 134074256 | 134074577 | 310 | 322 |
| Sb9 | 21365886 | 21365938 | Zm6 | 134074760 | 134074812 | 53  | 53  |
| Sb9 | 21365591 | 21365733 | Zm6 | 134074919 | 134075075 | 143 | 157 |
| Sb9 | 21365396 | 21365472 | Zm6 | 134075176 | 134075255 | 77  | 80  |

|     |          |          |     |           |           |     |     |
|-----|----------|----------|-----|-----------|-----------|-----|-----|
| Sb9 | 17016389 | 17016524 | Zm6 | 134281709 | 134281844 | 136 | 136 |
| Sb9 | 17016654 | 17016792 | Zm6 | 134281963 | 134282100 | 139 | 138 |
| Sb9 | 17026705 | 17026807 | Zm6 | 134283846 | 134283948 | 103 | 103 |
| Sb9 | 17027100 | 17027205 | Zm6 | 134284068 | 134284176 | 106 | 109 |
| Sb9 | 17027554 | 17027781 | Zm6 | 134284483 | 134284710 | 228 | 228 |
| Sb9 | 17027958 | 17028051 | Zm6 | 134284859 | 134284952 | 94  | 94  |
| Sb9 | 17750682 | 17750828 | Zm6 | 134322138 | 134322233 | 147 | 96  |
| Sb9 | 17751843 | 17751985 | Zm6 | 134323283 | 134323398 | 143 | 116 |
| Sb9 | 17752164 | 17752242 | Zm6 | 134323587 | 134323665 | 79  | 79  |
| Sb9 | 17756851 | 17756913 | Zm6 | 134323681 | 134323742 | 63  | 62  |
| Sb9 | 17756937 | 17757043 | Zm6 | 134325428 | 134325504 | 107 | 77  |
| Sb9 | 17758093 | 17758814 | Zm6 | 134326853 | 134327575 | 722 | 723 |
| Sb9 | 17758934 | 17758984 | Zm6 | 134327598 | 134327648 | 51  | 51  |
| Sb9 | 24627238 | 24627615 | Zm6 | 134488682 | 134489057 | 378 | 376 |
| Sb9 | 24624386 | 24624483 | Zm6 | 134491431 | 134491523 | 98  | 93  |
| Sb9 | 24624012 | 24624263 | Zm6 | 134491901 | 134492146 | 252 | 246 |
| Sb9 | 24623443 | 24623925 | Zm6 | 134492209 | 134492700 | 483 | 492 |
| Sb9 | 24623211 | 24623413 | Zm6 | 134492728 | 134492932 | 203 | 205 |
| Sb9 | 24622292 | 24622434 | Zm6 | 134492936 | 134493078 | 143 | 143 |
| Sb9 | 24616078 | 24616867 | Zm6 | 134495168 | 134495942 | 790 | 775 |
| Sb9 | 24608764 | 24608832 | Zm6 | 134496683 | 134496751 | 69  | 69  |
| Sb9 | 24608034 | 24608679 | Zm6 | 134500297 | 134500933 | 646 | 637 |
| Sb9 | 24602721 | 24603092 | Zm6 | 134500976 | 134501345 | 372 | 370 |
| Sb9 | 24602395 | 24602701 | Zm6 | 134505589 | 134505894 | 307 | 306 |
| Sb9 | 24599738 | 24599797 | Zm6 | 134505901 | 134505960 | 60  | 60  |
| Sb9 | 24599349 | 24599592 | Zm6 | 134506092 | 134506336 | 244 | 245 |

|     |          |          |     |           |           |     |     |
|-----|----------|----------|-----|-----------|-----------|-----|-----|
| Sb9 | 24599218 | 24599287 | Zm6 | 134506393 | 134506462 | 70  | 70  |
| Sb9 | 24597252 | 24597384 | Zm6 | 134506779 | 134506911 | 133 | 133 |
| Sb9 | 24595193 | 24595568 | Zm6 | 134508953 | 134509326 | 376 | 374 |
| Sb9 | 24595009 | 24595117 | Zm6 | 134509399 | 134509507 | 109 | 109 |
| Sb9 | 24594399 | 24594673 | Zm6 | 134518679 | 134518953 | 275 | 275 |
| Sb9 | 24587891 | 24588316 | Zm6 | 134519350 | 134519769 | 426 | 420 |
| Sb9 | 19511519 | 19511587 | Zm6 | 135105192 | 135105250 | 69  | 59  |
| Sb9 | 19511640 | 19511695 | Zm6 | 135105325 | 135105373 | 56  | 49  |
| Sb9 | 18480630 | 18481373 | Zm6 | 135394383 | 135395137 | 744 | 755 |
| Sb9 | 18482089 | 18482534 | Zm6 | 135395892 | 135396307 | 446 | 416 |
| Sb9 | 18483198 | 18483816 | Zm6 | 135396974 | 135397604 | 619 | 631 |
| Sb9 | 21489303 | 21489447 | Zm6 | 135634525 | 135634669 | 145 | 145 |
| Sb9 | 21488165 | 21488788 | Zm6 | 135635273 | 135635905 | 624 | 633 |
| Sb9 | 21487370 | 21487675 | Zm6 | 135639781 | 135640095 | 306 | 315 |
| Sb9 | 21487150 | 21487263 | Zm6 | 135640393 | 135640506 | 114 | 114 |
| Sb9 | 21486444 | 21486519 | Zm6 | 135641960 | 135642035 | 76  | 76  |
| Sb9 | 21486020 | 21486410 | Zm6 | 135642047 | 135642430 | 391 | 384 |
| Sb9 | 21478441 | 21478546 | Zm6 | 135644480 | 135644580 | 106 | 101 |
| Sb9 | 21478095 | 21478261 | Zm6 | 135644928 | 135645094 | 167 | 167 |
| Sb9 | 21472343 | 21472479 | Zm6 | 135647500 | 135647626 | 137 | 127 |
| Sb9 | 21470713 | 21470868 | Zm6 | 135648274 | 135648423 | 156 | 150 |
| Sb9 | 21469897 | 21470636 | Zm6 | 135648499 | 135649225 | 740 | 727 |
| Sb9 | 16332890 | 16333139 | Zm6 | 135693940 | 135694113 | 250 | 174 |
| Sb9 | 16333641 | 16333810 | Zm6 | 135694691 | 135694810 | 170 | 120 |
| Sb9 | 16333875 | 16333942 | Zm6 | 135694909 | 135694966 | 68  | 58  |
| Sb9 | 16888848 | 16888946 | Zm6 | 135699061 | 135699162 | 99  | 102 |

|     |          |          |     |           |           |     |     |
|-----|----------|----------|-----|-----------|-----------|-----|-----|
| Sb9 | 26651291 | 26651383 | Zm6 | 135840471 | 135840561 | 93  | 91  |
| Sb9 | 20969655 | 20969692 | Zm6 | 135884202 | 135884239 | 38  | 38  |
| Sb9 | 20969777 | 20969831 | Zm6 | 135884366 | 135884420 | 55  | 55  |
| Sb9 | 20970173 | 20970318 | Zm6 | 135884752 | 135884897 | 146 | 146 |
| Sb9 | 20970412 | 20970461 | Zm6 | 135884931 | 135884980 | 50  | 50  |
| Sb9 | 20970794 | 20970863 | Zm6 | 135885367 | 135885436 | 70  | 70  |
| Sb9 | 20983290 | 20983651 | Zm6 | 135887188 | 135887558 | 362 | 371 |
| Sb9 | 24300181 | 24300753 | Zm6 | 135961395 | 135961965 | 573 | 571 |
| Sb9 | 24305857 | 24306788 | Zm6 | 135962204 | 135963134 | 932 | 931 |
| Sb9 | 24306848 | 24306994 | Zm6 | 135963243 | 135963385 | 147 | 143 |
| Sb9 | 24307832 | 24308460 | Zm6 | 135963979 | 135964608 | 629 | 630 |
| Sb9 | 22933711 | 22933860 | Zm6 | 136055516 | 136055575 | 150 | 60  |
| Sb9 | 23470821 | 23470892 | Zm6 | 136089712 | 136089783 | 72  | 72  |
| Sb9 | 23470896 | 23470973 | Zm6 | 136089733 | 136089810 | 78  | 78  |
| Sb9 | 22422445 | 22422745 | Zm6 | 136118041 | 136118348 | 301 | 308 |
| Sb9 | 22421793 | 22422134 | Zm6 | 136118651 | 136118991 | 342 | 341 |
| Sb9 | 22421538 | 22421608 | Zm6 | 136119043 | 136119113 | 71  | 71  |
| Sb9 | 22414723 | 22415502 | Zm6 | 136119371 | 136120160 | 780 | 790 |
| Sb9 | 34802334 | 34802466 | Zm6 | 142398405 | 142398537 | 133 | 133 |
| Sb9 | 34802558 | 34802717 | Zm6 | 142398633 | 142398797 | 160 | 165 |
| Sb9 | 34802880 | 34803111 | Zm6 | 142398962 | 142399195 | 232 | 234 |
| Sb9 | 34074770 | 34074834 | Zm6 | 142407098 | 142407163 | 65  | 66  |
| Sb9 | 33756180 | 33756244 | Zm6 | 142407098 | 142407163 | 65  | 66  |
| Sb9 | 33756399 | 33756451 | Zm6 | 142407388 | 142407440 | 53  | 53  |
| Sb9 | 34074989 | 34075041 | Zm6 | 142407388 | 142407440 | 53  | 53  |
| Sb9 | 34090655 | 34091255 | Zm6 | 142408029 | 142408648 | 601 | 620 |

|     |          |          |     |           |           |      |      |
|-----|----------|----------|-----|-----------|-----------|------|------|
| Sb9 | 34170549 | 34170758 | Zm6 | 142409059 | 142409267 | 210  | 209  |
| Sb9 | 34091697 | 34091874 | Zm6 | 142409090 | 142409267 | 178  | 178  |
| Sb9 | 34170760 | 34170937 | Zm6 | 142409326 | 142409503 | 178  | 178  |
| Sb9 | 34091876 | 34092053 | Zm6 | 142409326 | 142409503 | 178  | 178  |
| Sb9 | 33774836 | 33774972 | Zm6 | 142409367 | 142409503 | 137  | 137  |
| Sb9 | 34092121 | 34092644 | Zm6 | 142409571 | 142410095 | 524  | 525  |
| Sb9 | 34171005 | 34171528 | Zm6 | 142409571 | 142410095 | 524  | 525  |
| Sb9 | 33775040 | 33775563 | Zm6 | 142409571 | 142410095 | 524  | 525  |
| Sb9 | 17815673 | 17815872 | Zm7 | 13827163  | 13827358  | 200  | 196  |
| Sb9 | 20933443 | 20934268 | Zm7 | 30199039  | 30199852  | 826  | 814  |
| Sb9 | 20933391 | 20933441 | Zm7 | 30200908  | 30200958  | 51   | 51   |
| Sb9 | 20933231 | 20933368 | Zm7 | 30201007  | 30201142  | 138  | 136  |
| Sb9 | 20932423 | 20932653 | Zm7 | 30202076  | 30202317  | 231  | 242  |
| Sb9 | 16333997 | 16334246 | Zm7 | 142788257 | 142788502 | 250  | 246  |
| Sb9 | 23463355 | 23463528 | Zm7 | 162529383 | 162529520 | 174  | 138  |
| Sb9 | 22628208 | 22628543 | Zm7 | 168947037 | 168947372 | 336  | 336  |
| Sb9 | 35262031 | 35262080 | Zm8 | 34617214  | 34617263  | 50   | 50   |
| Sb9 | 20114135 | 20115233 | Zm8 | 83910418  | 83911523  | 1099 | 1106 |
| Sb9 | 20115304 | 20115398 | Zm8 | 83911625  | 83911719  | 95   | 95   |
| Sb9 | 20116185 | 20116362 | Zm8 | 83912088  | 83912266  | 178  | 179  |
| Sb9 | 20139217 | 20139784 | Zm8 | 83912867  | 83913431  | 568  | 565  |
| Sb9 | 32846366 | 32846739 | Zm8 | 84096260  | 84096633  | 374  | 374  |
| Sb9 | 32839987 | 32840373 | Zm8 | 84099611  | 84099996  | 387  | 386  |
| Sb9 | 32839606 | 32839729 | Zm8 | 84100096  | 84100211  | 124  | 116  |
| Sb9 | 32838667 | 32839483 | Zm8 | 84101457  | 84102270  | 817  | 814  |
| Sb9 | 32830037 | 32830092 | Zm8 | 84103430  | 84103485  | 56   | 56   |

|     |          |          |     |           |           |      |      |
|-----|----------|----------|-----|-----------|-----------|------|------|
| Sb9 | 32821650 | 32822232 | Zm8 | 84103376  | 84103943  | 583  | 568  |
| Sb9 | 32820529 | 32820819 | Zm8 | 84106098  | 84106387  | 291  | 290  |
| Sb9 | 16329811 | 16329876 | Zm8 | 89584705  | 89584765  | 66   | 61   |
| Sb9 | 31746687 | 31747438 | Zm8 | 90663842  | 90664629  | 752  | 788  |
| Sb9 | 31746291 | 31746408 | Zm8 | 90665000  | 90665116  | 118  | 117  |
| Sb9 | 31745986 | 31746084 | Zm8 | 90665338  | 90665440  | 99   | 103  |
| Sb9 | 31745886 | 31745973 | Zm8 | 90665486  | 90665573  | 88   | 88   |
| Sb9 | 19135535 | 19135882 | Zm8 | 93370468  | 93370815  | 348  | 348  |
| Sb9 | 19135194 | 19135371 | Zm8 | 93370959  | 93371136  | 178  | 178  |
| Sb9 | 19119489 | 19119553 | Zm8 | 93388723  | 93388786  | 65   | 64   |
| Sb9 | 19119015 | 19119222 | Zm8 | 93389034  | 93389240  | 208  | 207  |
| Sb9 | 19114516 | 19114755 | Zm8 | 93390273  | 93390511  | 240  | 239  |
| Sb9 | 17508027 | 17508133 | Zm8 | 93459856  | 93459960  | 107  | 105  |
| Sb9 | 17506881 | 17507892 | Zm8 | 93460100  | 93461112  | 1012 | 1013 |
| Sb9 | 17501856 | 17502028 | Zm8 | 93468992  | 93469162  | 173  | 171  |
| Sb9 | 17501429 | 17501483 | Zm8 | 93469571  | 93469625  | 55   | 55   |
| Sb9 | 17498586 | 17498989 | Zm8 | 93470528  | 93470931  | 404  | 404  |
| Sb9 | 17493279 | 17493446 | Zm8 | 93474948  | 93475115  | 168  | 168  |
| Sb9 | 33599919 | 33600610 | Zm8 | 108618031 | 108618738 | 692  | 708  |
| Sb9 | 35130203 | 35130290 | Zm8 | 108625554 | 108625639 | 88   | 86   |
| Sb9 | 35129556 | 35130063 | Zm8 | 108625760 | 108626283 | 508  | 524  |
| Sb9 | 35129473 | 35129534 | Zm8 | 108626359 | 108626420 | 62   | 62   |
| Sb9 | 35129093 | 35129405 | Zm8 | 108627190 | 108627511 | 313  | 322  |
| Sb9 | 35129037 | 35129087 | Zm8 | 108627769 | 108627819 | 51   | 51   |
| Sb9 | 35124258 | 35124388 | Zm8 | 108627817 | 108627956 | 131  | 140  |
| Sb9 | 35124130 | 35124200 | Zm8 | 108628138 | 108628208 | 71   | 71   |

|     |          |          |     |           |           |     |     |
|-----|----------|----------|-----|-----------|-----------|-----|-----|
| Sb9 | 35116557 | 35116638 | Zm8 | 108628247 | 108628323 | 82  | 77  |
| Sb9 | 35064633 | 35065319 | Zm8 | 108628650 | 108629339 | 687 | 690 |
| Sb9 | 35064507 | 35064604 | Zm8 | 108630476 | 108630575 | 98  | 100 |
| Sb9 | 35063785 | 35064413 | Zm8 | 108630637 | 108631279 | 629 | 643 |
| Sb9 | 35735747 | 35735893 | Zm8 | 108754276 | 108754426 | 147 | 151 |
| Sb9 | 35767352 | 35767427 | Zm8 | 108755132 | 108755205 | 76  | 74  |
| Sb9 | 35767672 | 35767882 | Zm8 | 108755587 | 108755779 | 211 | 193 |
| Sb9 | 35768016 | 35768408 | Zm8 | 108755949 | 108756353 | 393 | 405 |
| Sb9 | 35770339 | 35770418 | Zm8 | 108758207 | 108758286 | 80  | 80  |
| Sb9 | 16887867 | 16887994 | Zm8 | 111867820 | 111867900 | 128 | 81  |
| Sb9 | 26631215 | 26631260 | Zm8 | 111870282 | 111870326 | 46  | 45  |
| Sb9 | 26631627 | 26631890 | Zm8 | 111870829 | 111870980 | 264 | 152 |
| Sb9 | 26631998 | 26632084 | Zm8 | 111871107 | 111871161 | 87  | 55  |
| Sb9 | 26633436 | 26633522 | Zm8 | 111872469 | 111872544 | 87  | 76  |
| Sb9 | 26633573 | 26633688 | Zm8 | 111872747 | 111872862 | 116 | 116 |
| Sb9 | 26650282 | 26650866 | Zm8 | 111887484 | 111888064 | 585 | 581 |
| Sb9 | 25894505 | 25894617 | Zm8 | 111947369 | 111947481 | 113 | 113 |
| Sb9 | 25894748 | 25894910 | Zm8 | 111947612 | 111947779 | 163 | 168 |
| Sb9 | 25894953 | 25895689 | Zm8 | 111949737 | 111950471 | 737 | 735 |
| Sb9 | 25896088 | 25896597 | Zm8 | 111950642 | 111951169 | 510 | 528 |
| Sb9 | 25900154 | 25900298 | Zm8 | 111957492 | 111957644 | 145 | 153 |
| Sb9 | 25873417 | 25873693 | Zm8 | 112007916 | 112008193 | 277 | 278 |
| Sb9 | 25867892 | 25868465 | Zm8 | 112008190 | 112008753 | 574 | 564 |
| Sb9 | 25866962 | 25867869 | Zm8 | 112008811 | 112009707 | 908 | 897 |
| Sb9 | 17814584 | 17814724 | Zm8 | 114059001 | 114059141 | 141 | 141 |
| Sb9 | 30814263 | 30814418 | Zm9 | 69363814  | 69363969  | 156 | 156 |

|     |          |          |     |           |           |     |     |
|-----|----------|----------|-----|-----------|-----------|-----|-----|
| Sb9 | 21879862 | 21880026 | Zm9 | 126141403 | 126141568 | 165 | 166 |
|-----|----------|----------|-----|-----------|-----------|-----|-----|
